# Supplementary material for: Identification of molecular correlations of RBM8A with autophagy in Alzheimer's disease
Source: publisher site journal article supplement (doi:10.18632/aging.102571), 2019-12-09
Supplement: Supplementary file [file aging-v11i23-102571-supplementary-material-SD1.pdf]

SUPPLEMENTARY FIGURE

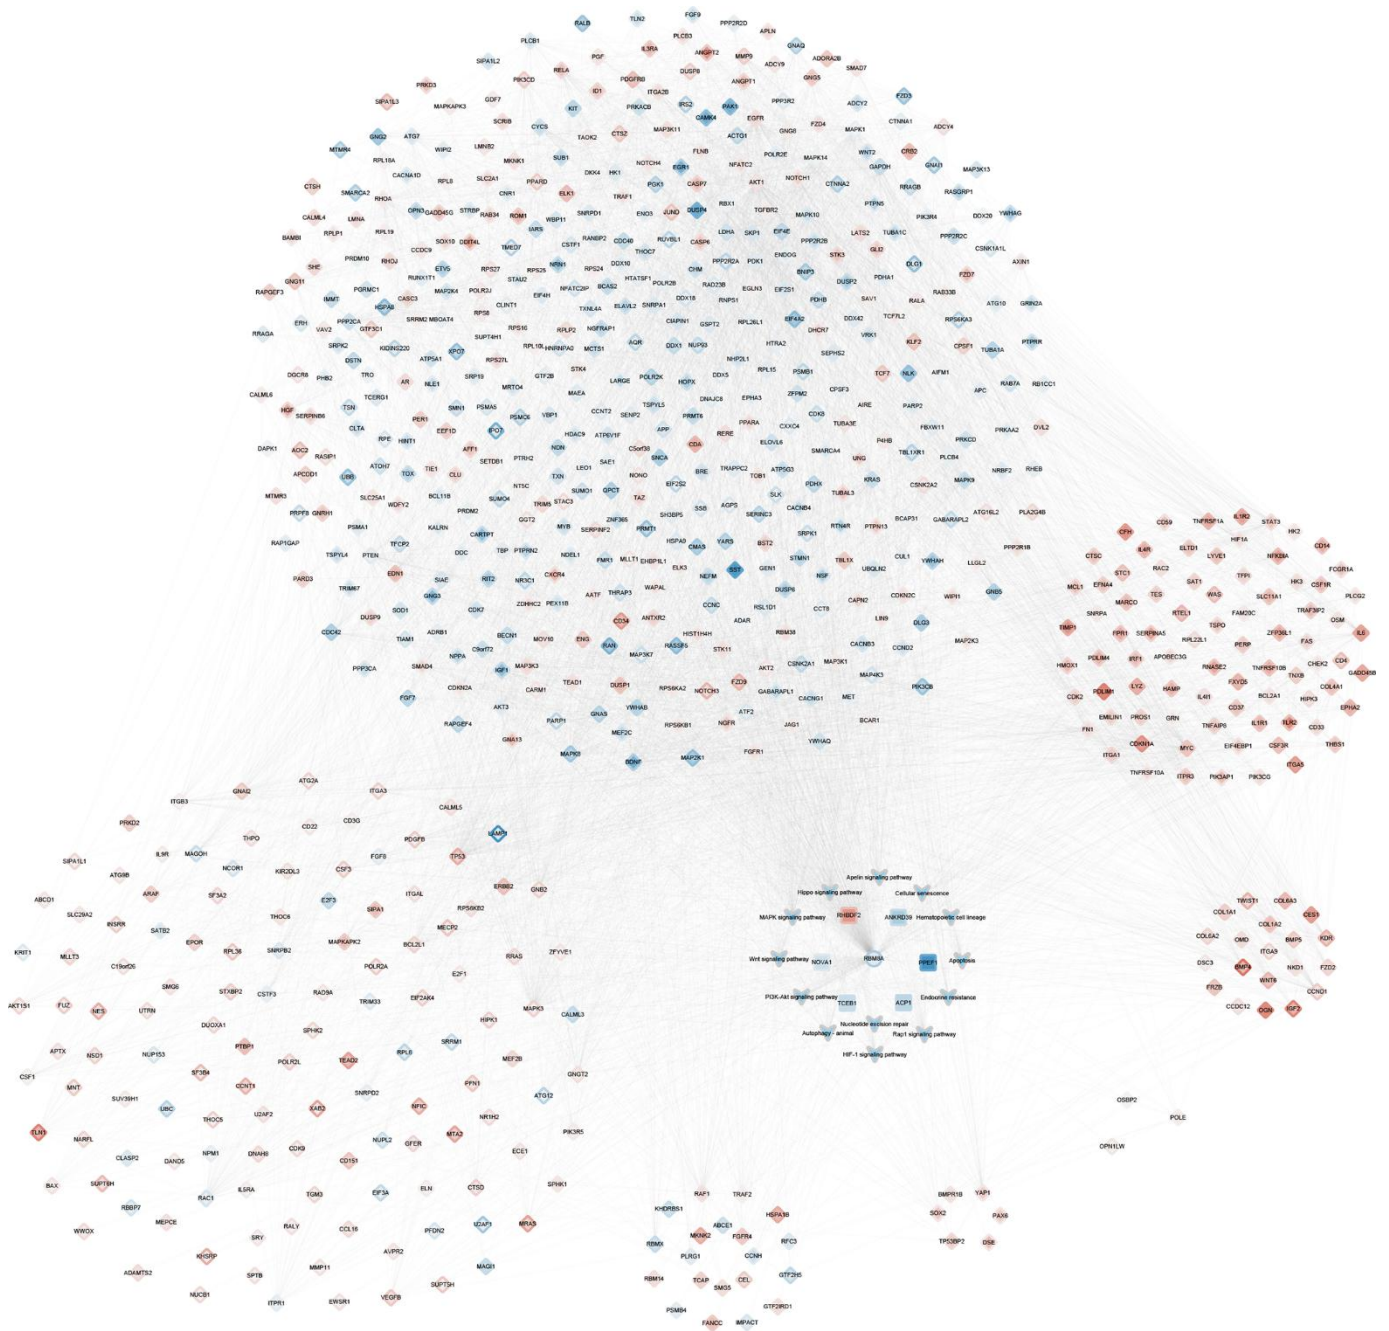

Supplementary Figure 1. RBM8A-module-pathway network. Red represents high expression of genes, blue represents low expression of genes.
