# Supplementary material for: Identification of molecular correlations of RBM8A with autophagy in Alzheimer's disease
Source: Aging (Albany NY). 2019 Dec 9;11(23):11673–85. doi: 10.18632/aging.102571 (PMC6932873; doi:10.18632/aging.102571)
Supplement: Supplementary Table 1 [file aging-11-102571-s003..xls]

## Sheet: AD versus control 
Supplementary Table 1. Differentially expressed genes in AD compared to control samples.
	logFC	AveExpr	t	P.Value	adj.P.Val	B
CRH	-0.984316	-0.473211	-25.2535	1.92233e-89	3.71818e-85	193.301
SYT1	-0.748026	-0.536164	-16.3879	4.86e-48	8.62404e-47	98.4365
S100A8	0.72726	-0.229857	14.5686	6.40229e-40	6.29553e-39	79.8454
SERPINA3	0.71924	-0.416905	15.5192	3.99214e-44	5.22436e-43	89.4721
RPS4Y1	-0.706388	-0.537189	-8.13114	3.83811e-15	1.05345e-14	23.3005
PPEF1	-0.675815	-0.331336	-24.0706	6.37642e-84	2.05555e-80	180.653
XIST	0.664702	-0.715394	7.37011	7.77301e-13	1.92086e-12	18.0768
S100A9	0.653004	-0.173249	14.7446	1.08232e-40	1.11293e-39	81.6124
VIP	-0.647202	-0.282825	-21.4347	1.56252e-71	5.59672e-69	152.264
SST	-0.634747	-0.344177	-20.1822	1.22504e-65	1.593e-63	138.757
VGF	-0.609042	-0.183919	-22.7313	1.23087e-77	1.25302e-74	166.25
FKBP5	0.606779	-0.0456664	22.5961	5.32145e-77	4.67852e-74	164.793
RGS1	0.596062	-0.155745	13.8733	6.60001e-37	5.42761e-36	72.95
SLCO4A1	0.592379	-0.00625386	19.9786	1.10855e-64	1.27629e-62	136.565
TNFRSF11B	0.588793	0.0519511	19.4536	3.21633e-62	2.78969e-60	130.922
C4B	0.573122	-0.0766236	22.6247	3.90421e-77	3.59596e-74	165.102
CBLN4	-0.568285	-0.222369	-22.4766	1.94336e-76	1.50354e-73	163.504
SLN	-0.56322	-0.239033	-18.239	1.49997e-56	6.43292e-55	117.933
TAC1	-0.560664	-0.298731	-20.7419	2.85622e-68	5.51902e-66	144.789
MCHR2	-0.551737	-0.277593	-18.7879	4.17133e-59	2.373e-57	123.789
NEUROD6	-0.548679	-0.15823	-24.7999	2.4934e-87	2.41137e-83	188.46
C4A	0.546647	-0.037335	22.3742	5.894e-76	4.07149e-73	162.4
FCGBP	0.543185	-0.1356	15.5644	2.5067e-44	3.33686e-43	89.9348
FREM3	-0.538853	-0.214341	-20.1675	1.43718e-65	1.84093e-63	138.598
TMSB4Y	-0.537467	-0.273729	-11.3443	1.6061e-26	7.44967e-26	49.2091
CHGB	-0.533897	-0.264248	-18.472	1.23841e-57	5.89985e-56	120.414
SLC4A10	-0.533395	-0.304495	-14.6495	2.83123e-40	2.84328e-39	80.6565
MT2A	0.528565	0.103201	16.2933	1.30596e-47	2.24733e-46	97.4533
ADCYAP1	-0.526455	-0.227907	-19.2642	2.48037e-61	1.92672e-59	128.889
JARID1D	-0.524309	-0.284396	-7.57283	1.962e-13	4.9828e-13	19.4293
SLC32A1	-0.523838	-0.220411	-20.1166	2.49045e-65	3.12794e-63	138.051
FRMPD2	-0.521944	-0.182092	-22.445	2.73537e-76	1.95954e-73	163.164
NEFL	-0.520366	-0.361593	-15.5342	3.4205e-44	4.50983e-43	89.6257
CXCL1	0.520028	-0.0530382	15.2947	4.00133e-43	4.85532e-42	87.1802
CRYM	-0.515837	-0.235152	-21.3759	2.95746e-71	1.04006e-68	151.629
DUSP4	-0.515563	-0.201965	-19.9153	2.19777e-64	2.37482e-62	135.883
CEBPD	0.512814	0.0478365	18.0086	1.75945e-55	6.59521e-54	115.483
S100A12	0.511164	-0.126608	12.2522	3.93653e-30	2.2025e-29	57.4565
DDX3Y	-0.510342	-0.454091	-6.2899	7.29433e-10	1.56798e-09	11.3741
PDLIM1	0.502711	0.0110614	16.1187	8.05922e-47	1.288e-45	95.6432
ADH1B	0.495862	-0.0280423	17.9571	3.04604e-55	1.11373e-53	114.937
SCIN	0.49575	-0.17753	15.9909	3.04219e-46	4.6626e-45	94.3221
MAFF	0.49525	-0.067132	17.9424	3.56616e-55	1.30145e-53	114.78
CAMK4	-0.489225	-0.223366	-22.4913	1.65636e-76	1.33489e-73	163.663
BDNF	-0.488327	-0.149426	-23.9461	2.44072e-83	6.74406e-80	179.317
EGR1	-0.485827	-0.121625	-18.0524	1.10262e-55	4.23995e-54	115.948
NUPR1	0.483953	0.0400748	21.0208	1.39002e-69	3.58478e-67	147.797
TLR2	0.483844	-0.104611	20.0631	4.44238e-65	5.37028e-63	137.475
EMP1	0.48209	-0.148741	17.2266	7.16057e-52	1.81758e-50	107.213
NMS	-0.481706	-0.257613	-20.7411	2.88192e-68	5.51902e-66	144.78
CSDA	0.480381	-0.0785418	16.9319	1.60951e-50	3.56191e-49	104.117
FLJ45910	0.479588	0.322001	12.4753	4.85256e-31	2.8511e-30	59.5342
OGN	0.479481	-0.0429305	10.2724	1.84177e-22	7.05557e-22	39.9479
PAK1	-0.479148	-0.264591	-21.2704	9.27976e-71	2.94245e-68	150.491
LOC400120	-0.478444	-0.215721	-21.0131	1.51102e-69	3.84553e-67	147.714
RGS4	-0.469946	-0.244044	-21.7459	5.34918e-73	2.35145e-70	155.622
USP9Y	-0.469763	-0.224926	-9.33963	3.9225e-19	1.29205e-18	32.3671
C1QA	0.469463	-0.0431194	18.2373	1.52734e-56	6.5358e-55	117.915
GEM	0.467275	-0.086208	20.0668	4.27181e-65	5.19657e-63	137.514
GABRG2	-0.465715	-0.305294	-15.6463	1.07751e-44	1.46976e-43	90.7744
ARPP-19	-0.462347	-0.267185	-20.3221	2.69596e-66	3.84893e-64	140.263
SCN3B	-0.461599	-0.229828	-20.3374	2.28389e-66	3.29664e-64	140.428
ANGPTL4	0.461297	-0.0785837	14.8229	4.90078e-41	5.15168e-40	82.4
BAG3	0.460028	-0.0206016	15.8607	1.17426e-45	1.71805e-44	92.9788
CD163	0.457096	-0.0644618	17.3547	1.8453e-52	5.01994e-51	108.562
SLC14A1	0.454693	-0.0907411	13.6284	7.35927e-36	5.68235e-35	70.5541
CFH	0.449152	0.0105528	19.3025	1.64079e-61	1.30066e-59	129.3
LOC441019	0.448341	0.128338	17.2705	4.503e-52	1.17223e-50	107.675
F13A1	0.448305	-0.0228323	12.0845	1.87509e-29	1.01137e-28	55.9074
ANGPT2	0.446349	-0.0760179	16.5845	6.2055e-49	1.1943e-47	100.484
FGF12	-0.441682	-0.252128	-17.1119	2.40837e-51	5.87423e-50	106.007
hCG_1776018	0.440042	-0.166752	15.2496	6.35174e-43	7.56498e-42	86.7207
TIMP1	0.439168	-0.10003	16.72	1.49733e-49	3.04857e-48	101.898
UCHL1	-0.438741	-0.127609	-16.6532	3.01898e-49	5.97067e-48	101.201
NMU	-0.438623	-0.203657	-19.5026	1.8959e-62	1.69771e-60	131.448
VSIG4	0.438275	-0.0640195	19.477	2.49948e-62	2.20753e-60	131.172
OLFM3	-0.43796	-0.174869	-20.4558	6.33739e-67	1.00474e-64	141.704
CALB1	-0.436842	-0.246504	-15.6723	8.24287e-45	1.13154e-43	91.0408
SCG2	-0.435842	-0.17483	-20.9534	2.88621e-69	6.97814e-67	147.07
EGR2	-0.43527	-0.158302	-16.2626	1.7987e-47	3.04112e-46	97.1349
SLC6A20	0.434738	0.00300539	11.038	2.45154e-25	1.07183e-24	46.5073
CA10	-0.433724	-0.192699	-22.9466	1.19617e-78	1.53581e-75	168.57
SPTLC3	0.433465	-0.033705	11.2284	4.52636e-26	2.05273e-25	48.1819
APOLD1	0.433256	-0.0214194	14.9468	1.39309e-41	1.51123e-40	83.6505
RHBDF2	0.432038	-0.0053845	21.7891	3.34816e-73	1.54191e-70	156.089
IFITM2	0.43161	0.0437821	18.0738	8.76891e-56	3.39896e-54	116.176
HSD11B2	0.431501	-0.0346578	18.7859	4.26199e-59	2.41746e-57	123.767
AEBP1	0.430867	0.0275598	19.3263	1.26982e-61	1.03632e-59	129.555
IL18	0.430015	-0.0683183	18.3228	6.11756e-57	2.75176e-55	118.825
CYorf15B	-0.429899	-0.241332	-7.37513	7.51492e-13	1.8585e-12	18.1099
IFITM2///IFITM1	0.428509	-0.00791222	19.0372	2.85836e-60	1.86778e-58	126.456
MT1M	0.427717	0.0810857	15.6121	1.53275e-44	2.07462e-43	90.424
KRT5	-0.426421	-0.10874	-19.8379	5.07539e-64	5.42365e-62	135.051
PCDH8	-0.42617	-0.161662	-17.4293	8.36235e-53	2.35779e-51	109.35
SV2B	-0.426161	-0.260594	-17.431	8.2137e-53	2.31926e-51	109.368
S100A11	0.425978	0.0397948	17.7004	4.69736e-54	1.48458e-52	112.215
GPR158	-0.424818	-0.258267	-17.298	3.36209e-52	8.83554e-51	107.965
ITPKB	0.424387	0.0183377	24.1353	3.17434e-84	1.22796e-80	181.347
LCP1	0.424329	-0.0581809	18.665	1.56128e-58	8.2735e-57	122.475
CFHR1	0.423748	0.0142252	19.2668	2.41147e-61	1.88076e-59	128.917
KLF15	0.42078	0.0442071	21.1674	2.83532e-70	8.43705e-68	149.379
IFITM3	0.420756	0.0592144	17.9776	2.44843e-55	9.02047e-54	115.154
VIM	0.420361	0.121615	16.1927	3.73023e-47	6.09376e-46	96.4094
ENSA	-0.418982	-0.155211	-13.5645	1.37719e-35	1.0442e-34	69.9315
IFI30	0.417456	-0.10066	16.2915	1.33135e-47	2.28897e-46	97.4342
GNG3	-0.416815	-0.169059	-20.3659	1.67745e-66	2.49578e-64	140.735
TUBB6	0.413137	-0.0119521	17.9236	4.3555e-55	1.56879e-53	114.581
RTN1	-0.41229	-0.126942	-17.1531	1.55773e-51	3.85783e-50	106.44
CHI3L1	0.411595	-0.235608	12.6855	6.6462e-32	4.08228e-31	61.5078
MT1X	0.409473	0.0206264	19.0127	3.71927e-60	2.38997e-58	126.194
C20orf54	0.409454	0.0540947	18.6468	1.89958e-58	9.9571e-57	122.28
SNAP25	-0.40865	0.0948464	-17.908	5.14326e-55	1.83883e-53	114.415
ANXA2	0.408249	-0.0432119	16.6717	2.48593e-49	4.95699e-48	101.394
ANXA2P2	0.407756	-0.0550447	17.0714	3.69592e-51	8.81462e-50	105.58
PRELP	0.40767	0.0590972	18.6027	3.04745e-58	1.55115e-56	121.81
FCGR2A	0.406134	-0.0731298	16.781	7.88267e-50	1.65186e-48	102.536
LOC401097	-0.404968	-0.120197	-22.5658	7.38826e-77	6.2132e-74	164.467
LILRB3	0.404958	-0.0363112	16.2531	1.98677e-47	3.34158e-46	97.036
DDIT4	0.404682	-0.00976053	17.0585	4.23278e-51	1.00086e-49	105.446
NCALD	-0.404293	-0.118308	-23.1317	1.61474e-79	2.23088e-76	170.563
RBM3	-0.403747	-0.233485	-13.9089	4.64502e-37	3.8626e-36	73.2991
SRGN	0.403148	-0.0250745	16.5218	1.19756e-48	2.25323e-47	99.8299
NELL1	-0.402852	-0.273372	-15.85	1.3114e-45	1.91002e-44	92.869
C1R	0.401576	-0.0167551	17.8198	1.31751e-54	4.44371e-53	113.479
DSP	0.400852	0.0421346	9.489	1.18684e-19	4.00205e-19	33.5487
ATOH8	0.400653	0.0328653	20.9826	2.10323e-69	5.21546e-67	147.385
ANXA2P1	0.400622	-0.0253427	17.2487	5.66597e-52	1.45154e-50	107.446
C1orf162	0.400464	-0.0489477	20.8305	1.09325e-68	2.40292e-66	145.745
ANKRD56	-0.400249	-0.254498	-19.0065	3.97611e-60	2.5298e-58	126.128
VWC2	-0.399057	-0.11725	-22.9411	1.27045e-78	1.53581e-75	168.51
CD44	0.397998	-0.157866	15.4361	9.38148e-44	1.19301e-42	88.6224
MT1G	0.396453	0.030157	13.4014	6.77223e-35	4.91699e-34	68.3492
CLEC2B	0.395977	0.00947711	20.307	3.17251e-66	4.44656e-64	140.101
IGF1	-0.395921	-0.0899359	-20.9168	4.29144e-69	1.00006e-66	146.675
GJA1	0.395494	0.00567728	15.0467	5.0422e-42	5.66026e-41	84.6609
CFI	0.395137	-0.0574095	17.7739	2.14824e-54	7.10414e-53	112.993
BEX5	-0.394591	-0.179712	-20.7006	4.46792e-68	8.4724e-66	144.344
HSPB3	-0.393015	-0.173934	-21.2959	7.0426e-71	2.30878e-68	150.765
MT1A	0.392952	-0.070407	13.906	4.77989e-37	3.96793e-36	73.2706
CARTPT	-0.39272	-0.235714	-11.1754	7.26079e-26	3.25239e-25	47.7134
CAP2	-0.392125	-0.185285	-20.3217	2.70631e-66	3.84893e-64	140.259
C6orf105	-0.389456	-0.15962	-20.6093	1.20114e-67	2.07433e-65	143.359
C1QC	0.388988	0.0234401	16.7362	1.26186e-49	2.58547e-48	102.068
TXNIP	0.388438	0.0145013	15.2738	4.95826e-43	5.96039e-42	86.967
GAD2	-0.388093	-0.167938	-18.1653	3.29952e-56	1.35786e-54	117.148
CDKN1A	0.387794	-0.0175173	15.709	5.63834e-45	7.82329e-44	91.4185
GBP2	0.386801	-0.158156	15.0562	4.57746e-42	5.15051e-41	84.757
HSPA1A	0.38568	-0.0809534	8.90209	1.20903e-17	3.72196e-17	28.9809
KHDRBS2	-0.384902	-0.126933	-19.3207	1.34859e-61	1.09599e-59	129.495
DDIT4L	0.384607	-0.0319658	17.3683	1.59715e-52	4.35101e-51	108.706
CES1	0.384287	-0.0189448	13.4374	4.77037e-35	3.49105e-34	68.6973
SERPINA5	0.382394	-0.180059	13.1144	1.09437e-33	7.46117e-33	65.5855
FBLN7	-0.381909	-0.153258	-20.8268	1.13891e-68	2.47516e-66	145.704
NAP1L5	-0.381702	-0.145202	-20.7936	1.63127e-68	3.42958e-66	145.346
STYK1	-0.381309	-0.209862	-16.6628	2.72846e-49	5.40716e-48	101.301
IL1R2	0.381237	-0.0295659	13.4341	4.92388e-35	3.59659e-34	68.6658
NFKBIA	0.38062	0.00574703	22.9143	1.69723e-78	1.93105e-75	168.222
DCLK1	-0.3791	-0.170102	-17.879	7.00958e-55	2.45615e-53	114.107
ADM	0.379076	-0.0308704	12.7913	2.42739e-32	1.52586e-31	62.5079
SVOP	-0.378874	-0.128735	-22.6331	3.56415e-77	3.44689e-74	165.192
NELL2	-0.378707	-0.23423	-14.42	2.85052e-39	2.69344e-38	78.361
TBX15	0.377892	0.0515574	16.1043	9.36426e-47	1.48828e-45	95.4939
CREG2	-0.376892	-0.186767	-16.3076	1.12506e-47	1.94468e-46	97.6016
FAM84A	-0.376438	-0.218823	-17.1451	1.69651e-51	4.19079e-50	106.355
IFITM1	0.374952	0.0121072	17.2074	8.77851e-52	2.21374e-50	107.011
FAM20A	0.374109	0.0518148	11.8714	1.341e-28	6.9227e-28	53.9554
IL6	0.373804	-0.158923	8.83855	1.97062e-17	6.01289e-17	28.4987
TMPRSS5	0.373241	-0.0787693	12.6689	7.7766e-32	4.75545e-31	61.3519
C3AR1	0.373086	-0.0698705	17.7345	3.26549e-54	1.05269e-52	112.576
TNFRSF10D	0.372513	-0.00978059	19.6249	5.06569e-63	4.77954e-61	132.761
PAK3	-0.372143	-0.236596	-16.7032	1.78461e-49	3.61067e-48	101.724
CRHBP	-0.372136	-0.199072	-17.3535	1.86906e-52	5.07745e-51	108.55
ADAMTS9	0.371035	-0.168511	11.197	5.98973e-26	2.69677e-25	47.9042
FAM107A	0.370757	0.104653	18.3572	4.23546e-57	1.92306e-55	119.191
PLA1A	0.370033	-0.00376073	17.0866	3.14642e-51	7.5883e-50	105.741
C1S	0.368904	-0.0329195	17.8255	1.23906e-54	4.21194e-53	113.54
MAL2	-0.368654	-0.112626	-21.8047	2.82733e-73	1.33381e-70	156.257
DYNC1I1	-0.368087	-0.194084	-16.7625	9.57666e-50	1.99388e-48	102.343
GPR4	0.367604	0.00161945	16.5265	1.13997e-48	2.15116e-47	99.8789
ELMOD1	-0.367462	-0.167656	-17.8533	9.22121e-55	3.16235e-53	113.834
S100A10	0.365897	0.0318129	16.9362	1.53788e-50	3.41511e-49	104.162
DIRAS2	-0.36536	-0.243355	-15.635	1.21023e-44	1.64384e-43	90.6589
FMOD	0.364405	0.0237251	11.3616	1.37504e-26	6.40867e-26	49.3631
ATP6V1B2	-0.363709	-0.242001	-15.9997	2.77595e-46	4.27487e-45	94.4132
ITGA5	0.362671	0.0449539	17.5449	2.45153e-53	7.22827e-52	110.571
IL18R1	0.361791	-0.00249526	12.4918	4.15605e-31	2.44931e-30	59.688
MS4A6A	0.361537	-0.031263	19.822	6.02204e-64	6.36493e-62	134.88
NRSN1	-0.361354	-0.0885588	-18.7326	7.55758e-59	4.14104e-57	123.197
DDN	-0.360857	-0.19219	-16.934	1.57384e-50	3.49097e-49	104.139
RNASE2	0.360229	-0.132547	13.7346	2.59412e-36	2.053e-35	71.59
MS4A4A	0.359045	-0.0289449	16.3048	1.15889e-47	2.00137e-46	97.5722
C1QB	0.35888	-0.0196147	17.0145	6.73855e-51	1.56092e-49	104.983
ENC1	-0.358128	-0.195967	-15.795	2.31712e-45	3.31738e-44	92.3028
C7	0.35773	0.0226571	16.4218	3.41235e-48	6.14542e-47	98.7883
SLC10A4	-0.356863	-0.143418	-21.1108	5.24018e-70	1.49052e-67	148.768
CCL2	0.355539	-0.194667	12.358	1.46241e-30	8.37604e-30	58.4392
MID1IP1	0.355521	0.124595	12.1691	8.54239e-30	4.69395e-29	56.6876
C19orf59	0.355035	0.0104745	14.1051	6.62856e-38	5.77521e-37	75.2338
FOXC1	0.355026	0.0546791	15.2333	7.49974e-43	8.88848e-42	86.5555
NRN1	-0.354089	-0.0950823	-23.7158	2.93075e-82	6.29851e-79	176.844
LOC284214	-0.35377	-0.0838654	-21.9376	6.69577e-74	3.40815e-71	157.69
SLC39A12	0.353161	-0.0236395	17.3745	1.49583e-52	4.08072e-51	108.771
HIG2	0.352944	-0.0366674	12.1382	1.13897e-29	6.2179e-29	56.4021
GJA4	0.352293	-0.00808888	16.2783	1.52789e-47	2.60604e-46	97.2972
APOD	0.351946	0.151672	11.2406	4.05998e-26	1.84555e-25	48.2897
ZFP36L1	0.351875	0.00659811	23.2947	2.77044e-80	4.12198e-77	172.317
MS4A7	0.350315	-0.0994284	16.3565	6.7483e-48	1.18444e-46	98.11
DEFB1	0.350167	-0.0302167	9.96537	2.41575e-21	8.81278e-21	37.4004
HLA-DRA	0.349848	-0.0692999	14.3993	3.5079e-39	3.30169e-38	78.1547
YWHAH	-0.34954	-0.170528	-15.9731	3.65914e-46	5.55535e-45	94.1384
PCK1	0.349443	-0.0243102	10.5141	2.34885e-23	9.37698e-23	41.9871
TMEFF1	-0.349307	-0.191817	-16.9879	8.91521e-51	2.02868e-49	104.705
LDB2	-0.349042	-0.198549	-17.5961	1.42377e-53	4.29618e-52	111.111
C1QL3	-0.348916	-0.248352	-13.2708	2.40908e-34	1.6975e-33	67.0887
SERPINI1	-0.348776	-0.185627	-17.9722	2.59467e-55	9.54108e-54	115.096
B3GALT2	-0.348316	-0.181529	-15.344	2.41524e-43	2.97931e-42	87.6821
PF4	0.347722	-0.0922169	11.8895	1.13559e-28	5.88546e-28	54.1204
KCNK1	-0.34731	-0.169063	-17.8197	1.31873e-54	4.44371e-53	113.478
TOMM20	-0.347121	-0.180093	-17.507	3.66607e-53	1.0631e-51	110.17
EGR3	-0.347033	-0.129436	-20.3507	1.9779e-66	2.87644e-64	140.571
C5orf40	-0.34668	-0.205868	-15.0859	3.38037e-42	3.83929e-41	85.0584
LAT2	0.346566	-0.112386	17.4557	6.32448e-53	1.80691e-51	109.628
NEK2	-0.346223	-0.137898	-19.9223	2.03783e-64	2.22687e-62	135.959
MT1E	0.346021	0.0848798	13.5328	1.87795e-35	1.41061e-34	69.6234
MT1H	0.345971	0.0023428	15.1291	2.17493e-42	2.50104e-41	85.4969
C20orf103	-0.345367	-0.213148	-15.2811	4.5984e-43	5.54503e-42	87.0419
GADD45B	0.344856	-0.0383567	12.5177	3.25398e-31	1.93181e-30	59.9309
PYGL	0.34392	-0.0606105	17.7408	3.05427e-54	9.91204e-53	112.643
SYN2	-0.34334	-0.20972	-15.9139	6.76209e-46	1.01076e-44	93.5277
A4GALT	0.343053	0.0769939	18.0972	6.8293e-56	2.69116e-54	116.424
MRC1	0.342877	-0.0436978	11.278	2.9092e-26	1.33277e-25	48.6201
ATP6V1A	-0.342705	-0.284401	-12.3693	1.31563e-30	7.55547e-30	58.5442
LRRC32	0.342411	0.0498037	18.6973	1.10417e-58	5.949e-57	122.82
ALOX5AP	0.341916	-0.107609	15.225	8.16841e-43	9.6632e-42	86.4706
RAB20	0.341034	0.0279859	17.7073	4.36235e-54	1.38322e-52	112.288
VCAM1	0.340414	0.00968222	11.9529	6.33403e-29	3.32915e-28	54.6996
LOC645405	-0.340313	-0.24322	-14.5567	7.21147e-40	7.05534e-39	79.7271
CDH8	-0.339985	-0.149347	-17.5288	2.90889e-53	8.5248e-52	110.4
CDK5R2	-0.339892	-0.102426	-21.1615	3.0251e-70	8.7468e-68	149.315
PRDM6	0.339754	0.0138933	13.7752	1.73798e-36	1.39147e-35	71.988
CLIC1	0.339013	-0.0196055	18.985	5.01172e-60	3.10694e-58	125.897
CD14	0.339005	-0.103934	14.3334	6.79222e-39	6.2889e-38	77.498
TUBB2A	-0.338774	-0.000841611	-18.477	1.17319e-57	5.64473e-56	120.468
NRXN3	-0.338442	-0.148813	-21.1865	2.30454e-70	7.00771e-68	149.586
PCP4	-0.338217	-0.150152	-16.791	7.09353e-50	1.49459e-48	102.641
FPR1	0.338048	-0.114851	12.6501	9.299e-32	5.67565e-31	61.1744
GLRB	-0.337757	-0.190215	-14.9507	1.33988e-41	1.45595e-40	83.6892
D4S234E	-0.336823	-0.251496	-14.6128	4.0971e-40	4.07017e-39	80.2891
ACTN2	-0.336175	-0.223037	-16.9474	1.3673e-50	3.05032e-49	104.279
VNN2	0.33614	0.00400006	12.6767	7.22254e-32	4.42784e-31	61.4253
PPBP	0.336113	-0.0712052	10.8568	1.20586e-24	5.10143e-24	44.9286
HGF	0.335896	-0.0589993	15.7249	4.78385e-45	6.67118e-44	91.5819
CORT	-0.335609	-0.127514	-21.5946	2.76075e-72	1.04703e-69	153.989
TYROBP	0.334939	-0.0141089	16.1847	4.05543e-47	6.60826e-46	96.3263
DMXL2	-0.334933	-0.225774	-16.2267	2.61563e-47	4.34635e-46	96.7625
DLX1	-0.334877	-0.123531	-19.759	1.18964e-63	1.21746e-61	134.203
FCGR1B	0.334849	-0.165834	11.3719	1.25362e-26	5.85829e-26	49.4548
PVALB	-0.334847	-0.199732	-12.4815	4.57952e-31	2.69395e-30	59.5917
LILRA2	0.334692	-0.0588783	18.7165	8.98865e-59	4.88366e-57	123.025
OLFM1	-0.334647	0.0299429	-21.6716	1.19771e-72	4.82629e-70	154.82
SLC16A9	0.334445	0.0231204	15.7876	2.50208e-45	3.56372e-44	92.2265
GAP43	-0.334331	0.0276166	-17.2032	9.17887e-52	2.30868e-50	106.966
C3	0.3341	-0.152423	13.5195	2.14004e-35	1.60002e-34	69.4936
IL4R	0.333919	0.00438488	16.7283	1.37103e-49	2.80322e-48	101.986
TNFRSF1A	0.333651	0.0197332	20.0225	6.89395e-65	8.18054e-63	137.037
PCP4L1	-0.332754	-0.0840985	-21.7234	6.82641e-73	2.87036e-70	155.38
S100A4	0.332194	0.0179203	16.7601	9.82003e-50	2.03361e-48	102.318
BCL6	0.332165	-0.0365582	20.0177	7.26494e-65	8.5682e-63	136.985
RAB3B	-0.331731	-0.189106	-16.7978	6.60652e-50	1.39807e-48	102.712
GOT1	-0.331386	-0.211416	-17.8136	1.40722e-54	4.73364e-53	113.414
CPVL	0.331311	-0.0516298	16.7965	6.6973e-50	1.41573e-48	102.698
SELL	0.330353	-0.00408458	16.509	1.3698e-48	2.56483e-47	99.6962
ZIC1	0.329437	-0.0121345	15.8946	8.26399e-46	1.22861e-44	93.3282
TBC1D9	-0.328902	-0.217211	-17.8433	1.02592e-54	3.5059e-53	113.728
CD93	0.328839	-0.0427204	14.0929	7.48467e-38	6.50937e-37	75.1131
CFB	0.328348	0.0222421	16.6187	4.33373e-49	8.48411e-48	100.841
GUCY1B3	-0.328174	-0.246223	-14.451	2.08734e-39	1.99473e-38	78.6707
PHYHD1	0.328083	0.0499163	18.1383	4.40461e-56	1.78604e-54	116.861
NYD-SP21	0.328034	-0.00445134	17.3328	2.32621e-52	6.24911e-51	108.332
LOC201229	-0.327676	-0.088653	-16.4955	1.57794e-48	2.94032e-47	99.5555
ATCAY	-0.327608	-0.0925216	-18.7354	7.33082e-59	4.0282e-57	123.228
ALX3	0.327398	0.0113143	13.443	4.51554e-35	3.31083e-34	68.7518
LPPR4	-0.326626	-0.119937	-19.8053	7.21428e-64	7.50208e-62	134.701
COL8A1	0.326587	0.0487103	12.8998	8.6096e-33	5.5472e-32	63.5371
MYOT	0.326476	-0.0698493	14.7954	6.47452e-41	6.74731e-40	82.1232
PROK2	0.326229	-0.00801623	13.5319	1.89536e-35	1.42258e-34	69.6142
NLK	-0.326127	-0.182847	-19.0219	3.37133e-60	2.1882e-58	126.292
TPD52L1	0.326116	0.0134494	19.7486	1.33176e-63	1.35573e-61	134.091
GABRA5	-0.324987	-0.149729	-16.6164	4.44307e-49	8.68058e-48	100.816
LOC728192	-0.324871	-0.0761959	-17.7282	3.49377e-54	1.12253e-52	112.509
B4GALT6	-0.324759	-0.184129	-18.1669	3.24249e-56	1.33723e-54	117.165
KCNV1	-0.324578	-0.169926	-17.122	2.1638e-51	5.31794e-50	106.113
NEGR1	-0.323957	-0.178735	-15.1571	1.63553e-42	1.89768e-41	85.7803
HPRT1	-0.323734	-0.0994867	-19.654	3.69969e-63	3.57797e-61	133.074
TRIP10	0.323695	0.0699276	18.4944	9.73049e-58	4.76474e-56	120.654
MIA	0.323614	-0.0284815	13.7779	1.69243e-36	1.3583e-35	72.0144
MLPH	0.323477	0.0062836	12.2836	2.93667e-30	1.65504e-29	57.7473
KCNJ3	-0.323241	-0.171179	-16.291	1.33736e-47	2.29523e-46	97.4297
EMP3	0.323134	-0.0279576	21.8056	2.80037e-73	1.33381e-70	156.266
COL8A2	0.32297	-0.0127304	16.6836	2.19453e-49	4.39862e-48	101.518
LOC647509	-0.322927	-0.102587	-18.7826	4.41462e-59	2.48483e-57	123.732
TNFRSF10B	0.322853	0.0129595	21.7196	7.11311e-73	2.92727e-70	155.339
MAP1B	-0.322502	-0.196324	-13.1376	8.74822e-34	5.98967e-33	65.8079
NXPH1	-0.322277	-0.0442904	-19.2091	4.49129e-61	3.35407e-59	128.298
BEX1	-0.322061	-0.0188999	-18.5473	5.52022e-58	2.75897e-56	121.218
LTF	0.322054	-0.119474	8.12504	4.01109e-15	1.09953e-14	23.257
LOC389073	-0.321696	-0.123589	-18.6309	2.25193e-58	1.16775e-56	122.111
TGIF1	0.321615	0.0131502	21.0218	1.37501e-69	3.58478e-67	147.808
GABRA1	-0.32112	-0.157039	-15.5454	3.04859e-44	4.03599e-43	89.7402
CNKSR2	-0.321056	-0.203159	-17.0411	5.08562e-51	1.19812e-49	105.263
CYorf15A	-0.321051	-0.0859287	-8.8088	2.47499e-17	7.51511e-17	28.2738
CIRBP	-0.320927	-0.102263	-15.5621	2.56644e-44	3.41404e-43	89.9114
FBXO16	-0.320534	-0.11102	-20.4317	8.22647e-67	1.2832e-64	141.445
GYPC	0.320198	0.0486387	17.8943	5.95343e-55	2.11675e-53	114.27
IL18RAP	0.319774	-0.0135506	13.5762	1.22754e-35	9.33667e-35	70.0458
CHST3	0.319636	-0.0242423	18.3402	5.07876e-57	2.30055e-55	119.01
HCK	0.319427	-0.0841803	13.6587	5.46636e-36	4.24961e-35	70.8495
LOC645652	0.319224	0.036783	17.0593	4.19612e-51	9.93407e-50	105.454
UBE2V2	-0.319079	-0.172211	-15.7997	2.20876e-45	3.16458e-44	92.3505
NFE2	0.318444	0.0224526	14.9084	2.05805e-41	2.21027e-40	83.2626
RELL1	0.317995	-0.0201304	18.9573	6.75206e-60	4.13286e-58	125.601
YWHAG	-0.317975	0.0554113	-16.7601	9.81792e-50	2.03361e-48	102.318
LOC399947	-0.317383	-0.135344	-16.9427	1.4364e-50	3.20079e-49	104.23
SNAP91	-0.317116	-0.161779	-16.2599	1.85039e-47	3.12578e-46	97.1067
MSX1	0.317066	0.061499	16.0314	1.99737e-46	3.10057e-45	94.7405
NETO2	-0.316925	-0.153658	-20.3863	1.34547e-66	2.0654e-64	140.955
SCG5	-0.316893	-0.117374	-18.0814	8.08331e-56	3.17135e-54	116.257
FLJ22655	-0.316327	-0.0492582	-11.2229	4.7568e-26	2.15471e-25	48.1327
ATP8A2	-0.316323	-0.157857	-18.0017	1.8932e-55	7.06918e-54	115.41
STMN2	-0.316285	-0.136622	-14.4221	2.79151e-39	2.63996e-38	78.3818
CDA	0.316177	0.0413114	17.2736	4.35322e-52	1.13477e-50	107.708
SCG3	-0.316026	-0.0832121	-19.7843	9.05604e-64	9.36694e-62	134.474
C21orf62	0.315602	-0.0761744	19.077	1.86302e-60	1.24257e-58	126.882
LRP10	0.31495	0.0520888	19.4443	3.55596e-62	3.04334e-60	130.822
SLC4A11	0.314587	0.0368784	15.274	4.94534e-43	5.94856e-42	86.9696
CCKBR	-0.314046	-0.0986462	-21.0285	1.27816e-69	3.38659e-67	147.881
FCGR3A	0.314029	-0.191642	10.2957	1.51209e-22	5.81678e-22	40.1432
ITGB2	0.313566	-0.071982	16.3577	6.66481e-48	1.17085e-46	98.1224
CDH13	-0.31347	-0.134253	-18.2107	2.03085e-56	8.57657e-55	117.631
FLJ36032	-0.313463	-0.126707	-18.4907	1.01305e-57	4.92324e-56	120.614
IL17RB	0.313358	-0.0339099	17.6527	7.80256e-54	2.41854e-52	111.71
FCER1G	0.31321	-0.0186812	17.0925	2.95539e-51	7.14539e-50	105.803
HVCN1	0.313071	-0.018933	20.7581	2.3974e-68	4.73168e-66	144.963
LAPTM5	0.312539	-0.0855438	16.424	3.33398e-48	6.01548e-47	98.8114
LRTM2	-0.31215	-0.0282396	-21.9451	6.16914e-74	3.22496e-71	157.772
GAD1	-0.312084	-0.14809	-18.9413	8.02376e-60	4.88036e-58	125.429
ADH1A	0.311713	-0.0349476	15.8482	1.33721e-45	1.94469e-44	92.8496
CD300A	0.311093	-0.0601715	14.1169	5.89522e-38	5.16419e-37	75.3504
LYZ	0.31098	0.00920738	13.0433	2.17077e-33	1.45485e-32	64.9053
TMEM176A	0.310916	0.0599733	17.8364	1.10357e-54	3.7646e-53	113.656
PRMT8	-0.310421	-0.0864938	-20.0598	4.60349e-65	5.53047e-63	137.439
TGFBR3	0.308932	-0.0406633	19.0981	1.48397e-60	9.96628e-59	127.108
GNG2	-0.308796	-0.175807	-15.3775	1.71242e-43	2.1355e-42	88.0241
PDLIM4	0.308664	-0.052047	15.0565	4.56178e-42	5.13884e-41	84.7604
RNASE3	0.308655	-0.0871929	12.9621	4.73399e-33	3.10495e-32	64.131
ANKRD25	0.308642	0.0349227	19.0685	2.0415e-60	1.34767e-58	126.791
MT1F	0.308628	0.007773	13.5939	1.03227e-35	7.88241e-35	70.2179
ADORA3	0.308322	-0.0788458	17.2906	3.63885e-52	9.54987e-51	107.887
DLEC1	0.307789	0.0284843	16.5063	1.40915e-48	2.63596e-47	99.668
C1orf78	0.307464	0.0635531	19.5779	8.41609e-63	7.86396e-61	132.256
LIMK2	0.307347	-0.045836	16.5606	7.97415e-49	1.52407e-47	100.234
HAMP	0.307208	-0.185614	10.0251	1.46984e-21	5.41722e-21	37.8921
LOC643037	-0.307148	-0.133952	-17.5551	2.19984e-53	6.51598e-52	110.678
HLA-DMB	0.30697	-0.0674797	13.683	4.30821e-36	3.36549e-35	71.086
FAM19A1	-0.306869	-0.120262	-17.4668	5.62116e-53	1.61073e-51	109.745
TBXAS1	0.306414	-0.0451483	16.5206	1.21191e-48	2.27801e-47	99.818
MLLT11	-0.30634	-0.0725779	-17.9252	4.28159e-55	1.54505e-53	114.598
SPG3A	-0.306178	-0.118777	-19.1859	5.76316e-61	4.25462e-59	128.05
SECTM1	0.305846	-0.0944544	11.519	3.33247e-27	1.6086e-26	50.7686
KIAA1467	-0.305834	-0.17658	-17.3797	1.41549e-52	3.88345e-51	108.826
RAB13	0.305799	0.0839389	19.0181	3.51088e-60	2.27115e-58	126.251
C10orf105	0.30577	-0.00813964	13.1076	1.16853e-33	7.95274e-33	65.5204
MRGPRF	0.305677	0.0266372	13.5346	1.84449e-35	1.3874e-34	69.6413
RANBP3L	0.305041	0.038456	14.8933	2.39887e-41	2.56348e-40	83.1102
NP	0.304665	-0.0265536	15.9844	3.25519e-46	4.96936e-45	94.2548
AQP4	0.304646	-0.0450148	17.5353	2.71603e-53	7.97169e-52	110.469
OR7A5	0.304103	-0.0185226	13.1545	7.4281e-34	5.10751e-33	65.9703
EPHA2	0.303721	0.0504859	16.6412	3.42283e-49	6.74866e-48	101.076
NCF2	0.303678	-0.0248971	14.9623	1.19025e-41	1.29774e-40	83.807
GPRASP1	-0.303497	-0.150042	-19.1759	6.42117e-61	4.6691e-59	127.942
TAC3	-0.303474	-0.117053	-15.9439	4.95586e-46	7.45963e-45	93.8367
IHPK3	0.3031	-0.139225	11.7102	5.86487e-28	2.92367e-27	52.4917
PNOC	-0.30284	-0.0769559	-19.8075	7.04947e-64	7.37032e-62	134.724
MGC2889	-0.302313	-0.101259	-18.4332	1.87611e-57	8.74401e-56	120.001
IER3	0.302125	0.0446254	14.0064	1.76798e-37	1.50512e-36	74.2589
ROM1	0.301944	0.00959888	20.3022	3.34316e-66	4.65205e-64	140.049
FGFRL1	0.301625	0.119935	17.739	3.11307e-54	1.00691e-52	112.624
SLC2A5	0.301221	-0.0925357	13.6216	7.87122e-36	6.06072e-35	70.4873
GPSM3	0.30062	0.0612718	18.6418	2.00404e-58	1.0448e-56	122.227
EMX2	0.300558	0.0407024	18.2421	1.45067e-56	6.2353e-55	117.966
TNFRSF1B	0.300395	0.00396156	18.1082	6.0717e-56	2.42642e-54	116.541
LTBR	0.300224	0.0831996	17.5383	2.63015e-53	7.73137e-52	110.501
HIST1H1C	0.300111	-0.0213816	14.9916	8.83453e-42	9.74771e-41	84.1033
CHN1	-0.299969	-0.0459733	-15.0419	5.29632e-42	5.93519e-41	84.612
HMGCS1	-0.299676	-0.179696	-14.8987	2.27203e-41	2.42928e-40	83.1642
ACTR3B	-0.299228	-0.128163	-20.1821	1.22716e-65	1.593e-63	138.755
MICALL2	0.299213	0.00300439	15.1414	1.91997e-42	2.21443e-41	85.6209
ACSL5	0.299191	-0.0159387	15.512	4.29794e-44	5.61315e-43	89.3987
TNFRSF12A	0.299067	-0.120617	15.6574	9.60528e-45	1.31322e-43	90.8887
CAPS	0.299008	-0.0167338	16.2519	2.01096e-47	3.37639e-46	97.024
MOAP1	-0.299	-0.145142	-17.11	2.4569e-51	5.98507e-50	105.987
PXN	0.298993	0.0582444	21.7805	3.67824e-73	1.65452e-70	155.995
CNN2	0.298888	0.0587666	13.4985	2.626e-35	1.95731e-34	69.2903
TMEM155	-0.298707	-0.0920479	-18.2624	1.16811e-56	5.05451e-55	118.181
PLAC8	0.298525	-0.160377	9.91486	3.67176e-21	1.3302e-20	36.9862
CD74	0.298277	0.0508664	13.7183	3.04451e-36	2.40453e-35	71.431
PCSK1	-0.298219	-0.120941	-19.2	4.95475e-61	3.68595e-59	128.2
LRRTM1	-0.298	-0.111489	-16.148	5.93956e-47	9.5497e-46	95.9468
RPH3A	-0.297521	0.0106383	-17.8924	6.07484e-55	2.14807e-53	114.25
STX11	0.2975	0.0665304	15.5277	3.6563e-44	4.79784e-43	89.5594
URP2	0.297226	0.00974566	16.5666	7.48606e-49	1.43504e-47	100.297
CEBPB	0.297154	0.0402101	19.2477	2.96107e-61	2.28179e-59	128.712
PECAM1	0.29692	-0.0177232	17.7076	4.34915e-54	1.3813e-52	112.291
TASP1	-0.296406	-0.0643493	-19.9997	8.82481e-65	1.02825e-62	136.792
FAM89A	0.296089	0.0616683	18.312	6.86927e-57	3.07559e-55	118.71
EIF4A2	-0.296015	-0.115261	-14.8426	4.0146e-41	4.23856e-40	82.5983
LRP4	0.295807	0.050103	17.7957	1.70267e-54	5.66835e-53	113.224
PLA2G2A	0.295655	-0.109691	8.81976	2.27585e-17	6.92676e-17	28.3566
KIFAP3	-0.295613	-0.201932	-15.8508	1.3013e-45	1.89673e-44	92.8766
LOC730034	-0.295588	-0.0952707	-19.7384	1.48677e-63	1.49001e-61	133.981
DARC	0.295177	0.0502435	13.5749	1.24443e-35	9.46142e-35	70.0322
PTGDS	0.295158	0.286043	9.50925	1.00827e-19	3.41121e-19	33.7099
MFSD4	-0.294747	-0.155785	-16.401	4.23778e-48	7.58253e-47	98.5728
CIDEA	-0.294736	-0.216701	-14.8614	3.31528e-41	3.51944e-40	82.7886
SLC13A4	0.294388	-0.00420019	9.41571	2.13695e-19	7.11777e-19	32.9674
FAM3C	-0.294259	-0.120251	-17.8831	6.70884e-55	2.35503e-53	114.151
PDK4	0.2934	-0.108825	11.5503	2.50843e-27	1.2166e-26	51.0503
KCNC2	-0.293327	-0.152798	-16.1519	5.70715e-47	9.19132e-46	95.9865
LOC441052	-0.293229	-0.046447	-16.7434	1.17033e-49	2.40558e-48	102.143
C5orf13	-0.293186	-0.0528962	-24.2875	6.16425e-85	3.9743e-81	182.978
PLSCR4	0.292896	-0.0698337	14.0879	7.86271e-38	6.83508e-37	75.0642
ARHGAP20	-0.292709	-0.181204	-15.9866	3.18258e-46	4.87005e-45	94.2772
METTL7B	0.292691	-0.012796	19.771	1.04583e-63	1.07599e-61	134.331
IGF2	0.292214	0.129291	9.79789	9.6323e-21	3.41912e-20	36.0321
PENK	-0.29211	-0.15694	-11.0265	2.71543e-25	1.18453e-24	46.406
RIT2	-0.291998	-0.134625	-15.1777	1.32521e-42	1.54597e-41	85.9895
SRPX2	0.291957	0.00826652	16.0451	1.73299e-46	2.69449e-45	94.8817
ZIC2	0.291517	0.0493414	16.4762	1.92934e-48	3.5608e-47	99.3555
SLC7A7	0.291275	-0.0529104	17.386	1.32455e-52	3.64315e-51	108.892
ATRNL1	-0.291227	-0.115232	-19.3865	6.63364e-62	5.55445e-60	130.201
CRYAB	0.291204	0.0919707	10.6903	5.13897e-24	2.11216e-23	43.4923
CKMT1B	-0.291039	-0.155886	-14.5114	1.13772e-39	1.10249e-38	79.2739
BTBD14A	0.290981	-0.0208527	17.3335	2.30907e-52	6.21168e-51	108.339
SERPINH1	0.290708	0.00820299	12.5451	2.51325e-31	1.50313e-30	60.1873
CXCR4	0.290166	-0.0553013	13.5784	1.2021e-35	9.15032e-35	70.0666
C9orf61	0.289903	-0.0321769	15.6095	1.57541e-44	2.13088e-43	90.3967
RARRES3	0.289704	-0.0316613	14.3981	3.54933e-39	3.33906e-38	78.1431
RBP4	-0.289554	-0.105203	-18.5247	7.03186e-58	3.47852e-56	120.978
HN1	-0.289489	-0.179811	-17.8699	7.72028e-55	2.67609e-53	114.011
FYB	0.289219	-0.120543	13.8991	5.11794e-37	4.23582e-36	73.2027
CRB2	0.288991	0.047239	16.3824	5.15167e-48	9.09986e-47	98.3786
TLN1	0.288262	0.134591	12.9459	5.53303e-33	3.61188e-32	63.9761
RP5-1022P6.2	-0.288128	-0.0822726	-17.7239	3.65724e-54	1.17311e-52	112.464
RAN	-0.28789	-0.18689	-13.8482	8.45726e-37	6.90503e-36	72.7037
EBI3	0.287848	0.0223053	16.6172	4.40262e-49	8.61025e-48	100.825
SNCA	-0.287775	-0.178855	-17.781	1.99092e-54	6.60521e-53	113.069
SYTL4	0.287716	0.0217224	18.2797	9.70357e-57	4.2463e-55	118.366
TREM2	0.287279	-0.0607959	13.9025	4.94792e-37	4.10213e-36	73.2363
SLA	0.287085	-0.044698	18.4725	1.23173e-57	5.8825e-56	120.42
CYBRD1	0.28702	0.0584982	16.8887	2.53688e-50	5.55071e-49	103.664
EPB41L3	-0.286949	-0.199377	-14.9485	1.36894e-41	1.48586e-40	83.6679
DUSP2	-0.286798	-0.0460296	-19.6305	4.76971e-63	4.52234e-61	132.821
C18orf33	-0.286563	-0.0441358	-20.5328	2.75121e-67	4.5482e-65	142.535
FLJ20160	-0.286254	-0.203448	-15.261	5.65002e-43	6.77092e-42	86.8371
FZD7	0.285825	0.0170912	17.4092	1.03486e-52	2.8842e-51	109.138
VSNL1	-0.285391	-0.114077	-17.2672	4.66131e-52	1.20857e-50	107.64
BCL3	0.285356	0.115344	15.251	6.25904e-43	7.45917e-42	86.7353
FER1L3	0.284927	-0.00221449	16.6145	4.53303e-49	8.8474e-48	100.796
FBXW7	-0.284835	-0.149018	-16.8094	5.84561e-50	1.24112e-48	102.834
ATP1B1	-0.284806	-0.0930447	-15.708	5.69632e-45	7.89808e-44	91.4083
HCLS1	0.284553	-0.0289644	19.0743	1.91717e-60	1.27429e-58	126.854
SRD5A1	-0.284525	-0.0803838	-20.7682	2.14825e-68	4.32827e-66	145.072
GABRD	-0.284398	-0.0927256	-18.7122	9.40616e-59	5.09181e-57	122.979
KCNIP4	-0.284331	-0.158481	-17.028	5.84055e-51	1.35942e-49	105.125
DLG3	-0.284024	-0.154368	-16.0662	1.39082e-46	2.17472e-45	95.1005
RTP1	-0.283904	-0.103224	-15.7478	3.77663e-45	5.32805e-44	91.817
STOM	0.283745	0.0274845	18.7587	5.7081e-59	3.1635e-57	123.476
FXYD5	0.283358	0.0547	18.8788	1.5715e-59	9.35259e-58	124.76
ROBO2	-0.282593	-0.138489	-17.0141	6.76011e-51	1.56404e-49	104.98
RGS7	-0.282228	-0.132256	-20.6457	8.10209e-68	1.43771e-65	143.751
OLFML2A	0.282068	0.0632757	10.8356	1.45151e-24	6.11524e-24	44.7449
SLC22A2	0.282036	0.0165037	10.1083	7.33269e-22	2.74277e-21	38.5803
HCN1	-0.281979	-0.130425	-14.9795	9.9955e-42	1.09724e-40	83.9806
MST150	0.281967	0.0177907	17.6363	9.28505e-54	2.85066e-52	111.537
OLAH	0.281434	0.0198544	15.3279	2.8485e-43	3.48706e-42	87.5181
ERBB2IP	0.281194	-0.0448298	17.8931	6.02811e-55	2.13545e-53	114.257
ARL4C	-0.280536	-0.196547	-15.9065	7.30339e-46	1.09083e-44	93.4511
SCN8A	-0.280435	-0.0994651	-19.1066	1.35459e-60	9.19318e-59	127.199
ANKRD39	-0.279531	-0.0987999	-22.4536	2.49204e-76	1.85389e-73	163.257
C6orf176	-0.27949	-0.0786587	-14.2966	9.81162e-39	8.96864e-38	77.1324
FCER1A	0.27949	-0.0552876	7.21292	2.21656e-12	5.37994e-12	17.0481
FOXJ1	0.279415	0.0121573	13.1487	7.86021e-34	5.39887e-33	65.9142
GPR120	-0.27938	-0.106377	-21.1041	5.6311e-70	1.5785e-67	148.696
C10orf54	0.279209	-0.0323774	16.6038	5.06807e-49	9.85192e-48	100.685
CP	0.279032	-0.069905	14.3575	5.33182e-39	4.96046e-38	77.7386
A2BP1	-0.278999	-0.149829	-16.8532	3.68792e-50	7.94339e-49	103.292
PLK2	-0.278926	-0.181001	-16.2135	3.00172e-47	4.97083e-46	96.6255
CLEC5A	0.278724	0.0694923	16.4357	2.94977e-48	5.34719e-47	98.9332
ALDH1L1	0.278544	-0.0142712	16.4724	2.00908e-48	3.70136e-47	99.3152
PRPH2	-0.278541	-0.184481	-12.0736	2.07458e-29	1.11586e-28	55.8071
IL15RA	0.27853	0.000381134	17.8932	6.02534e-55	2.13545e-53	114.258
MPZL2	0.278481	0.00883857	18.2802	9.656e-57	4.23506e-55	118.371
DUSP6	-0.278455	-0.0398499	-17.0864	3.15395e-51	7.59697e-50	105.738
LOC253962	-0.278297	-0.0787893	-17.9271	4.19556e-55	1.51967e-53	114.618
C6orf145	0.278268	-0.0422531	19.6095	5.98101e-63	5.61577e-61	132.596
2019-03-04	-0.278162	-0.0044981	-20.6984	4.57504e-68	8.59131e-66	144.32
EGR4	-0.278068	-0.124251	-12.9491	5.36568e-33	3.505e-32	64.0066
ALOX5	0.278028	-0.0494524	13.6116	8.67742e-36	6.65498e-35	70.3904
C1orf90	0.277735	0.030544	15.214	9.14273e-43	1.08092e-41	86.3585
CA4	-0.277414	-0.122155	-15.4737	6.37325e-44	8.2017e-43	89.0069
FRMPD4	-0.27739	-0.18881	-16.5475	9.15073e-49	1.73864e-47	100.097
GAS1	0.277368	-0.00182717	12.2332	4.70106e-30	2.62267e-29	57.2803
CASP1	0.277107	0.00176783	17.2183	7.82378e-52	1.98073e-50	107.125
SLC7A2	0.277005	-0.000406151	20.5521	2.23374e-67	3.78992e-65	142.742
IL1R1	0.276732	-0.0224192	15.3349	2.65105e-43	3.25359e-42	87.5895
LOC387763	0.276643	0.00115619	11.2059	5.53413e-26	2.4963e-25	47.9826
ELOVL7	0.276643	0.0143951	16.9902	8.70376e-51	1.98524e-49	104.728
SMAD6	0.276456	0.0283938	12.9031	8.33877e-33	5.37987e-32	63.5688
CPZ	0.276413	-0.0227302	9.71909	1.83709e-20	6.43713e-20	35.3935
MAP2K1	-0.276386	-0.228783	-12.889	9.54422e-33	6.13099e-32	63.4348
CSTA	0.276344	-0.0314648	13.6404	6.54207e-36	5.0635e-35	70.671
IL13RA1	0.276248	-0.0701777	19.6621	3.38937e-63	3.31097e-61	133.161
STAT4	-0.276223	-0.131314	-14.7975	6.33751e-41	6.60809e-40	82.1444
HAPLN1	-0.276099	-0.119197	-19.1288	1.06628e-60	7.47244e-59	127.437
STAB1	0.275824	0.0206903	16.39	4.7585e-48	8.47504e-47	98.4575
SIX1	0.275722	0.0607407	9.13553	1.96831e-18	6.28754e-18	30.7735
MARK1	-0.275653	-0.142885	-17.2294	6.95049e-52	1.76658e-50	107.243
C1orf76	-0.275651	-0.0794657	-18.1054	6.26002e-56	2.49652e-54	116.511
GALNTL2	0.275588	-0.110952	13.3584	1.02947e-34	7.39399e-34	67.9332
ANXA3	0.27551	0.00260847	16.0919	1.06552e-46	1.68376e-45	95.3655
MT1P2	0.275311	-0.0137562	12.7539	3.46599e-32	2.16116e-31	62.1542
RGS7BP	-0.275202	-0.162038	-14.2958	9.89157e-39	9.03745e-38	77.1244
RASSF5	-0.275019	-0.19412	-13.1879	5.378e-34	3.71637e-33	66.2911
SH3GL2	-0.274835	-0.189274	-12.7093	5.29866e-32	3.26911e-31	61.7328
KLK5	-0.274618	-0.129257	-13.35	1.11688e-34	8.00987e-34	67.8523
HLA-DPA1	0.274612	-0.0275971	11.5924	1.71348e-27	8.37758e-27	51.4283
WIF1	-0.274571	0.0394903	-9.78354	1.08367e-20	3.83537e-20	35.9155
C1orf95	-0.274486	-0.055453	-20.5402	2.53923e-67	4.23395e-65	142.614
KLHL6	0.274456	-0.00676778	17.2428	6.03525e-52	1.54002e-50	107.383
DLEU7	-0.274185	-0.132421	-17.3371	2.22408e-52	6.00813e-51	108.377
SLC1A3	0.274087	0.104647	13.7476	2.28164e-36	1.81164e-35	71.7176
KCNIP1	-0.273939	-0.0956605	-16.4601	2.28513e-48	4.18947e-47	99.1871
FSTL1	0.273693	0.0161719	17.4268	8.59246e-53	2.41563e-51	109.323
BMP4	0.273655	0.181468	9.30563	5.14017e-19	1.68482e-18	32.1
C1orf128	-0.273317	-0.216055	-12.9887	3.67002e-33	2.42437e-32	64.3838
CHML	-0.273045	-0.097456	-20.3765	1.49524e-66	2.25945e-64	140.85
CCR5	0.27297	-0.0844999	12.6733	7.46291e-32	4.56796e-31	61.3928
EBI2	0.27276	-0.0218014	8.75486	3.73645e-17	1.12588e-16	27.8673
CD200	-0.272724	-0.137752	-19.1357	9.89937e-61	6.98809e-59	127.511
GRAMD3	0.272576	0.00857897	14.9689	1.11327e-41	1.21654e-40	83.8734
BASP1	-0.272526	0.0382624	-16.4279	3.19959e-48	5.78919e-47	98.8523
UNC5D	-0.272359	-0.146661	-16.1725	4.60415e-47	7.46467e-46	96.2001
B4GALT1	0.272352	0.0497092	17.0556	4.3635e-51	1.02925e-49	105.415
ADAM33	0.272282	0.0771409	14.938	1.52429e-41	1.64709e-40	83.561
PTPRR	-0.272277	-0.0509706	-19.529	1.42612e-62	1.29503e-60	131.731
KIAA1239	-0.272203	-0.102159	-16.3396	8.05183e-48	1.40431e-46	97.9344
HSPA1B	0.272198	0.0562106	7.73856	6.23591e-14	1.61726e-13	20.5564
EDN1	0.272121	-0.0404914	10.9122	7.42327e-25	3.17095e-24	45.4093
KLHL14	-0.272039	-0.125906	-15.347	2.34233e-43	2.89306e-42	87.7126
IRX3	0.271969	0.0764793	11.6111	1.44546e-27	7.08339e-27	51.597
METTL7A	0.27186	0.0181324	17.511	3.51414e-53	1.02211e-51	110.212
CSF1R	0.271717	0.00755879	14.2319	1.87243e-38	1.68058e-37	76.4902
ZNF238	-0.27148	-0.177144	-12.1938	6.7873e-30	3.75086e-29	56.9158
NOPE	0.271472	0.0422259	18.0163	1.62012e-55	6.10847e-54	115.565
GRIK2	-0.271301	-0.158848	-16.8356	4.43879e-50	9.52886e-49	103.108
NKIRAS1	-0.271298	-0.148258	-16.3783	5.37328e-48	9.46538e-47	98.3367
PCDH19	-0.271225	-0.10299	-16.6437	3.33509e-49	6.58238e-48	101.101
2019-03-03	0.27097	-0.0375014	16.8583	3.49427e-50	7.56843e-49	103.346
GDAP1	-0.270724	-0.164306	-15.8891	8.74841e-46	1.29565e-44	93.2715
SEPP1	0.270657	-0.0366616	12.4118	8.82573e-31	5.11866e-30	58.9405
RNF150	-0.270171	-0.108593	-16.5851	6.165e-49	1.18768e-47	100.49
ETV5	-0.270097	-0.0328448	-18.0153	1.63703e-55	6.16022e-54	115.554
ARPP-21	-0.269928	-0.157338	-18.8214	2.90963e-59	1.67994e-57	124.147
MARCO	0.2698	-0.0500785	7.76789	5.08135e-14	1.32333e-13	20.7577
LOC157503	-0.269448	-0.100385	-17.5699	1.87998e-53	5.61151e-52	110.835
PPM1E	-0.269149	-0.194138	-13.0206	2.69938e-33	1.80101e-32	64.6889
LOC402573	0.269079	-0.0295819	11.6642	8.92294e-28	4.40836e-27	52.0755
HMOX1	0.26882	-0.0299953	13.907	4.7329e-37	3.93229e-36	73.2805
SLC11A1	0.268781	-0.0672631	13.3592	1.02109e-34	7.33771e-34	67.9413
C1orf173	-0.268675	-0.171372	-13.8057	1.28703e-36	1.04158e-35	72.2865
BEX2	-0.268578	-0.0648453	-19.2537	2.77711e-61	2.1486e-59	128.776
FAM19A2	-0.268177	-0.0923219	-15.0788	3.63431e-42	4.11804e-41	84.9864
GIMAP5	0.268173	0.0296809	18.0165	1.61695e-55	6.1084e-54	115.567
TNIP2	0.268146	-0.00149023	18.5781	3.96825e-58	1.99361e-56	121.547
RASL12	0.268134	-0.0476007	15.3452	2.38416e-43	2.94285e-42	87.695
IL10RA	0.267831	0.0252735	16.6034	5.08814e-49	9.881e-48	100.681
ATP2B2	-0.267517	-0.0972595	-19.1957	5.18882e-61	3.84529e-59	128.154
CASP4	0.267242	-0.00639507	17.6317	9.7501e-54	2.98396e-52	111.488
TCIRG1	0.267172	0.0336357	18.5191	7.4678e-58	3.68475e-56	120.918
TMEM10	-0.266975	-0.117309	-8.6504	8.25408e-17	2.44039e-16	27.0853
SLC39A10	-0.266725	-0.0918359	-19.011	3.79007e-60	2.4274e-58	126.175
TMBIM1	0.266623	0.0086496	14.008	1.73908e-37	1.48117e-36	74.2753
CLEC7A	0.266416	-0.0130338	15.016	6.89023e-42	7.65045e-41	84.3504
HLA-DRB3	0.266337	-0.00869656	9.77322	1.17943e-20	4.16819e-20	35.8318
C5AR1	0.266	0.0555889	12.9587	4.89099e-33	3.20683e-32	64.0986
MKNK2	0.265955	0.0610308	13.4749	3.3083e-35	2.4442e-34	69.0609
LOC286002	-0.265925	-0.168534	-14.7457	1.07072e-40	1.10159e-39	81.6231
PCMT1	-0.265883	-0.15473	-16.23	2.52802e-47	4.208e-46	96.7964
IL3RA	0.265633	0.0138949	15.8529	1.27256e-45	1.85765e-44	92.8988
SLC30A3	-0.265323	-0.0378436	-20.9995	1.75013e-69	4.39622e-67	147.568
VAMP8	0.265154	0.00176753	16.9929	8.45942e-51	1.93407e-49	104.757
SERPING1	0.264848	0.0208603	17.4385	7.58682e-53	2.14853e-51	109.447
ACOT7	-0.264635	-0.0667048	-17.6273	1.02219e-53	3.12341e-52	111.441
FCGR2B	0.264542	0.0167234	12.1949	6.71745e-30	3.71332e-29	56.9261
UNC84B	0.264281	0.0143708	15.9857	3.21129e-46	4.90622e-45	94.2683
CNTNAP2	-0.264218	-0.0941158	-18.5573	4.96085e-58	2.48582e-56	121.325
NDRG4	-0.264097	-0.0254415	-17.1946	1.00507e-51	2.51815e-50	106.876
KIAA1949	0.26384	0.0492696	17.5626	2.03115e-53	6.04407e-52	110.758
COL6A3	0.263516	-0.00750897	10.003	1.7668e-21	6.4882e-21	37.71
MYD88	0.263504	-0.0329102	17.6557	7.55154e-54	2.34826e-52	111.742
SLC38A2	0.263334	-0.0849199	14.5403	8.50557e-40	8.28372e-39	79.563
CD34	0.263243	0.111028	11.0357	2.50273e-25	1.09297e-24	46.4868
C1QTNF4	-0.263241	-0.0959	-20.299	3.45923e-66	4.77917e-64	140.015
hCG_38480///KCTD1	-0.263199	-0.132511	-19.1834	5.92529e-61	4.35768e-59	128.022
GRIK1	-0.263164	-0.0889361	-21.4684	1.08464e-71	3.95831e-69	152.627
C13orf15	0.262931	-0.00193665	15.1838	1.24438e-42	1.45517e-41	86.052
TRIM22	0.262826	-0.0592891	18.4152	2.2746e-57	1.05505e-55	119.809
RASGRP1	-0.262811	-0.0915548	-16.7937	6.89747e-50	1.45637e-48	102.669
MOV10L1	0.262796	0.125438	20.9508	2.96935e-69	7.09051e-67	147.042
CD180	0.262793	0.00106886	15.4932	5.21664e-44	6.75823e-43	89.206
GBP3	0.262613	-0.0537219	10.3774	7.55764e-23	2.95075e-22	40.8298
FLJ32679	-0.262575	-0.162214	-12.7099	5.26952e-32	3.25217e-31	61.7383
SOD2	0.262535	-0.143796	10.2978	1.48575e-22	5.71887e-22	40.1606
UBE2T	-0.262455	-0.130587	-16.2646	1.76233e-47	2.98485e-46	97.1552
RNASE4	0.26237	0.00147124	16.7071	1.71448e-49	3.47605e-48	101.763
GRIA1	-0.262106	-0.106799	-14.3213	7.66694e-39	7.07439e-38	77.3776
PITPNB	-0.262054	-0.144953	-10.1456	5.36561e-22	2.02107e-21	38.8894
ABBA-1	0.262042	0.189183	11.1401	9.93284e-26	4.42675e-25	47.4028
KCNA4	-0.261937	-0.117096	-14.5858	5.38237e-40	5.31423e-39	80.0179
IQGAP1	0.261931	-0.0104168	19.9698	1.21972e-64	1.39519e-62	136.469
CLDN5	0.261738	0.0296852	15.2075	9.76527e-43	1.15241e-41	86.293
HOPX	-0.261576	-0.0542571	-19.4459	3.49643e-62	3.00569e-60	130.838
KIAA1199	0.261556	0.00574352	10.1668	4.4881e-22	1.69648e-21	39.0662
CHST6	0.261514	-0.0650769	14.1739	3.34018e-38	2.96357e-37	75.915
C6orf142	-0.261474	-0.0701155	-18.0088	1.75592e-55	6.59475e-54	115.485
NRIP3	-0.261238	-0.108455	-18.1515	3.82222e-56	1.56299e-54	117.002
TBRG1	-0.261139	-0.0766673	-18.4111	2.37767e-57	1.09759e-55	119.765
MRAP	0.261115	0.0211675	11.4353	7.09272e-27	3.36326e-26	50.0196
CASP7	0.260947	-0.00189022	17.8267	1.22416e-54	4.16859e-53	113.553
PEAR1	0.260786	0.0715911	15.714	5.35805e-45	7.44508e-44	91.4692
OCA2	-0.260367	-0.0918177	-17.4316	8.16632e-53	2.30925e-51	109.373
TPBG	-0.260303	-0.11712	-14.4529	2.04951e-39	1.96052e-38	78.6889
GNA13	0.259986	-0.0164467	20.3179	2.81947e-66	3.9806e-64	140.219
HMHA1	0.259974	0.0269076	18.2002	2.27132e-56	9.5504e-55	117.52
PCYOX1L	-0.25986	-0.0754002	-17.2682	4.60998e-52	1.19686e-50	107.651
CDKN2AIPNL	-0.259474	-0.102076	-20.0454	5.38358e-65	6.42773e-63	137.283
ADAMTS1	0.259467	-0.0579906	11.0359	2.49854e-25	1.09164e-24	46.4885
PLTP	0.25944	0.121141	16.8845	2.65041e-50	5.78603e-49	103.621
SH3TC1	0.259418	-0.0196745	17.3762	1.46892e-52	4.01298e-51	108.789
SQRDL	0.259404	-0.0120817	18.4244	2.06191e-57	9.58688e-56	119.907
NSF	-0.259106	-0.012365	-17.4558	6.31435e-53	1.80669e-51	109.629
GIMAP4	0.259048	-0.0166512	17.8756	7.26883e-55	2.53322e-53	114.071
SLC47A2	0.258996	-0.030425	11.0103	3.13042e-25	1.36217e-24	46.265
CD99	0.258579	0.0733857	13.6796	4.45297e-36	3.47716e-35	71.0532
GNB5	-0.258527	-0.140718	-17.649	8.10825e-54	2.50127e-52	111.671
RBM13	-0.258172	0.0367871	-11.9738	5.22228e-29	2.75681e-28	54.8911
MICA	0.257997	0.227297	17.6925	5.10735e-54	1.61152e-52	112.131
MSN	0.257994	0.0258993	17.6667	6.72285e-54	2.1007e-52	111.858
LOC389023	-0.257919	-0.101447	-18.3145	6.687e-57	3.00092e-55	118.736
RIMBP2	-0.25791	-0.121145	-20.1687	1.41856e-65	1.82919e-63	138.611
TCL1B	0.25788	-0.0568847	15.9735	3.64552e-46	5.53901e-45	94.1421
NME5	-0.257873	-0.128743	-16.8034	6.2276e-50	1.31932e-48	102.771
PCLO	-0.257808	-0.118374	-18.5855	3.66398e-58	1.85036e-56	121.626
AKR1C3	0.257698	-0.0299659	14.6908	1.86614e-40	1.89417e-39	81.0708
TRAF3IP2	0.25767	-0.00815554	18.4921	9.97851e-58	4.86438e-56	120.629
GRIA2	-0.257426	-0.161783	-13.6751	4.65501e-36	3.62907e-35	71.0091
GADD45G	0.257334	-0.00621004	13.2293	3.60351e-34	2.51621e-33	66.6888
ARHGEF9	-0.257186	-0.156581	-14.6579	2.59956e-40	2.62288e-39	80.7413
CYTL1	0.257111	-0.0445276	13.2379	3.31548e-34	2.3218e-33	66.7715
LOC150166	0.257107	0.0251236	19.183	5.95108e-61	4.36006e-59	128.018
ATP6V1G2	-0.256916	-0.0110623	-18.1761	2.93893e-56	1.21984e-54	117.263
LRRC1	0.256856	-0.0830438	15.3497	2.27833e-43	2.81941e-42	87.7402
AOX1	0.256434	0.0186737	12.1379	1.14136e-29	6.22744e-29	56.4
C1orf64	0.25643	0.0356523	13.914	4.41255e-37	3.67561e-36	73.3501
RUNX1	0.2563	-0.0121844	14.0606	1.03178e-37	8.90131e-37	74.7941
NUAK2	0.256085	0.0543782	15.0175	6.78455e-42	7.54177e-41	84.3658
C6orf154	-0.256064	-0.0819809	-20.2109	8.98306e-66	1.19007e-63	139.065
CMAS	-0.255759	-0.174768	-17.2631	4.86793e-52	1.25541e-50	107.597
FLJ22662	0.255748	0.018349	16.1554	5.49959e-47	8.86442e-46	96.0233
BGN	0.255693	0.0787924	15.1921	1.14391e-42	1.34094e-41	86.1357
TMEM130	-0.255589	-0.0362372	-15.248	6.45781e-43	7.68658e-42	86.7042
FOXO1	0.255581	0.0193571	20.6541	7.398e-68	1.34993e-65	143.842
RASL10A	-0.255506	-0.0824159	-18.9993	4.29896e-60	2.70848e-58	126.05
SIDT1	-0.255453	-0.112057	-15.4181	1.12834e-43	1.4283e-42	88.4389
DLL4	0.255232	0.0458363	14.6947	1.79282e-40	1.82221e-39	81.1107
C10orf116	0.254835	0.037439	14.1308	5.13186e-38	4.52005e-37	75.4882
SERPINB1	0.254782	-0.052349	13.5711	1.29092e-35	9.80716e-35	69.9958
CYBB	0.254619	-0.0841347	12.1481	1.03903e-29	5.68672e-29	56.4933
LOC493869	0.254584	0.0683205	10.5922	1.19907e-23	4.84284e-23	42.653
CD302	0.254417	0.00900669	20.503	3.80043e-67	6.17713e-65	142.213
MAP7D2	-0.254246	-0.115669	-16.2021	3.38166e-47	5.55025e-46	96.507
PIK3AP1	0.254211	-0.0424975	14.4845	1.49173e-39	1.43762e-38	79.0046
MRVI1	0.254161	-0.00692852	13.2581	2.72672e-34	1.91713e-33	66.9657
TMEM132D	-0.253931	-0.0439597	-19.4705	2.68118e-62	2.35725e-60	131.103
DSE	0.253856	-0.0162037	20.2254	7.67537e-66	1.03095e-63	139.222
ADD2	-0.25379	-0.102393	-19.1097	1.30922e-60	8.94801e-59	127.233
AKR1C1	0.253648	-0.0576436	12.6354	1.06918e-31	6.51134e-31	61.0358
NPC2	0.25359	-0.0330729	19.9375	1.72786e-64	1.92071e-62	136.123
SIPA1	0.253484	0.0335864	19.1085	1.32753e-60	9.0412e-59	127.219
DUSP1	0.253348	0.0357475	11.1826	6.80595e-26	3.05502e-25	47.7776
TSPAN13	-0.253321	-0.0782588	-15.082	3.51791e-42	3.99082e-41	85.0188
CACNG3	-0.253205	-0.00605737	-16.1697	4.74056e-47	7.67297e-46	96.171
FGD2	0.253146	0.00507198	14.5967	4.82071e-40	4.76942e-39	80.1274
AZGP1	0.253043	-0.0671457	13.22	3.94348e-34	2.74864e-33	66.5992
RNASE6	0.253013	-0.0212546	16.3097	1.1006e-47	1.9058e-46	97.6235
NLRC4	0.252912	-0.0506484	14.3222	7.59174e-39	7.00904e-38	77.3874
OPN3	-0.25284	-0.141669	-15.6839	7.3074e-45	1.00813e-43	91.1606
IRF1	0.252791	0.0203411	13.2751	2.31076e-34	1.63001e-33	67.1301
WSB2	-0.252723	-0.0431583	-23.2971	2.69803e-80	4.12198e-77	172.344
NWD1	0.252491	0.0975273	11.5525	2.45917e-27	1.19361e-26	51.07
EFHD1	0.252233	-0.0171097	12.9257	6.71397e-33	4.35777e-32	63.784
ATP2B1	-0.252154	-0.14128	-16.2065	3.22932e-47	5.31135e-46	96.5528
LOC387856	-0.251938	-0.0296336	-18.4904	1.016e-57	4.92516e-56	120.611
QPCT	-0.251937	-0.154436	-13.5233	2.06144e-35	1.54245e-34	69.5308
OSR1	0.251927	0.121928	7.13767	3.63828e-12	8.75487e-12	16.5619
RP11-216N14.7	0.251866	-0.0360939	15.0439	5.18983e-42	5.81922e-41	84.6322
PTBP1	0.251819	0.0496472	19.8335	5.32065e-64	5.65451e-62	135.004
ANGPT1	0.251625	0.0229652	18.9637	6.30697e-60	3.88501e-58	125.669
LILRB5	0.251547	0.058125	10.1517	5.09478e-22	1.92055e-21	38.9407
TEAD2	0.251344	0.0932876	15.3378	2.57188e-43	3.16446e-42	87.6196
ITGB4	0.251262	0.0615688	16.6839	2.18642e-49	4.38691e-48	101.522
NECAP1	-0.251127	-0.115665	-18.0685	9.27586e-56	3.58111e-54	116.12
RTN4R	-0.251103	0.0792702	-19.9233	2.01526e-64	2.21473e-62	135.97
CSRP1	0.251077	0.0419913	17.33	2.39655e-52	6.42024e-51	108.302
VWF	0.251056	-0.00267349	14.4888	1.42855e-39	1.37742e-38	79.0476
NDUFA4	-0.251051	-0.0122113	-18.1028	6.43362e-56	2.54998e-54	116.484
CYBA	0.251031	-0.0410824	16.2965	1.26348e-47	2.17809e-46	97.4862
CPNE4	-0.250683	-0.0468826	-16.3883	4.84269e-48	8.6068e-47	98.4401
DLX2	-0.25041	0.034205	-14.2767	1.19764e-38	1.08908e-37	76.9343
LBH	-0.25039	-0.0659298	-15.401	1.34573e-43	1.6935e-42	88.2637
CDC42	-0.250333	-0.116109	-18.4337	1.86557e-57	8.71592e-56	120.007
TSLP	0.250178	0.0195932	14.4366	2.41403e-39	2.2972e-38	78.5262
PF4V1	0.250034	-0.0375108	11.5687	2.12329e-27	1.03318e-26	51.2156
LOC440731	0.250006	-0.010213	18.1413	4.26418e-56	1.73273e-54	116.893
HPR	0.249901	-0.0417252	8.77139	3.29388e-17	9.94851e-17	27.9917
FAM129B	0.249711	0.0807071	17.2763	4.23132e-52	1.10448e-50	107.737
PPFIA2	-0.249669	-0.150213	-16.6653	2.65919e-49	5.28613e-48	101.327
LOC375196	-0.249501	-0.0939976	-20.3847	1.36917e-66	2.08524e-64	140.938
TUSC3	-0.249402	-0.123427	-16.7	1.84561e-49	3.73018e-48	101.69
PRPS2	-0.249354	-0.138528	-16.395	4.51594e-48	8.06531e-47	98.5096
COL1A2	0.249326	0.0266037	10.3211	1.21946e-22	4.71264e-22	40.3561
CARD6	0.24918	0.00790472	20.6868	5.18979e-68	9.652e-66	144.195
ARRDC2	0.24899	0.0246527	13.4784	3.19643e-35	2.36426e-34	69.095
CRISPLD2	0.248976	-0.00227185	10.7406	3.31879e-24	1.37133e-23	43.9255
FGF14	-0.248902	-0.16905	-14.8011	6.11127e-41	6.38252e-40	82.1806
NPTX1	-0.248787	-0.0926424	-13.4411	4.60093e-35	3.37088e-34	68.7332
ZFP36	0.248645	0.0158789	12.5918	1.61472e-31	9.73869e-31	60.6265
SBNO2	0.248258	0.0844623	16.5567	8.3021e-49	1.58518e-47	100.194
MAPKAPK2	0.248159	0.0588471	19.6377	4.41216e-63	4.24577e-61	132.898
LILRB2	0.248107	0.0176157	13.1307	9.34402e-34	6.39081e-33	65.7424
CBLN2	-0.24802	-0.120868	-14.5461	8.02762e-40	7.83797e-39	79.6205
NPTX2	-0.24767	-0.155606	-10.0453	1.24211e-21	4.59104e-21	38.0587
NBEA	-0.247663	-0.122796	-15.5901	1.92265e-44	2.5807e-43	90.1986
CHRM3	-0.247643	-0.183215	-13.6228	7.77466e-36	5.99113e-35	70.4995
HIST1H2BD	0.247558	-0.0351147	14.2376	1.76877e-38	1.5905e-37	76.5468
CD86	0.247471	-0.0340677	14.2781	1.18033e-38	1.07435e-37	76.9488
LAIR1	0.247436	-0.0805156	14.4643	1.82723e-39	1.75222e-38	78.803
KIAA0984	-0.247317	-0.131072	-14.71	1.53582e-40	1.56677e-39	81.2645
PRKD3	0.247309	0.0156105	21.882	1.22316e-73	6.06623e-71	157.091
PODN	0.24721	0.124121	13.2695	2.44026e-34	1.71885e-33	67.076
MYCT1	0.247161	0.0109043	15.0597	4.41654e-42	4.98394e-41	84.7926
SERPIND1	0.247061	0.00575584	9.41552	2.14023e-19	7.12747e-19	32.9659
STAR	-0.246883	-0.120231	-15.3491	2.29224e-43	2.83481e-42	87.7341
NAV3	-0.246817	-0.163341	-14.5245	9.98018e-40	9.68573e-39	79.4041
TARBP1	-0.246725	-0.0311958	-16.1967	3.57605e-47	5.85673e-46	96.4514
LOC338651	-0.246707	-0.0749888	-17.5713	1.85297e-53	5.53942e-52	110.849
VSTM2A	-0.246581	-0.137508	-13.3799	8.34952e-35	6.02823e-34	68.1412
SOX9	0.246382	0.0826123	16.8757	2.91071e-50	6.33284e-49	103.527
ATP6AP2	-0.246305	-0.147006	-16.444	2.70325e-48	4.91874e-47	99.02
GPR61	-0.246299	-0.0060871	-18.9271	9.34849e-60	5.61873e-58	125.277
H19	0.246234	0.000489007	7.71067	7.57229e-14	1.95415e-13	20.3654
ISG20	0.246149	-0.0395208	12.9895	3.63939e-33	2.4066e-32	64.3921
MGC26718	-0.246126	-0.095008	-15.3133	3.30706e-43	4.03312e-42	87.3697
GDF15	0.246025	0.0168737	11.7748	3.25099e-28	1.64437e-27	53.077
TMEM118	-0.245836	-0.0958093	-22.1527	6.49907e-75	3.80924e-72	160.012
SASH1	0.245768	0.0118092	18.001	1.90864e-55	7.1131e-54	115.402
LMO4	-0.245759	-0.00244276	-16.5772	6.69853e-49	1.28662e-47	100.408
PLXNB1	0.245526	-0.0276272	18.0334	1.35065e-55	5.16289e-54	115.746
FLJ20699	0.245481	-0.0328238	18.8262	2.76518e-59	1.60132e-57	124.198
SLC44A3	0.245417	-0.0181275	13.2886	2.02806e-34	1.43372e-33	67.2597
CPM	0.245159	-0.0725595	14.2798	1.16105e-38	1.0573e-37	76.9651
PRKY	-0.245092	-0.0708548	-6.11512	2.03608e-09	4.26348e-09	10.3728
FNDC5	-0.245085	-0.0553003	-19.4506	3.32303e-62	2.86937e-60	130.889
DRD1	-0.244943	-0.216908	-11.8525	1.59536e-28	8.20895e-28	53.7831
PRSS16	-0.24478	-0.0703355	-17.682	5.70795e-54	1.79517e-52	112.021
FLJ25076	-0.244377	-0.130625	-14.7258	1.30953e-40	1.33945e-39	81.4229
CFC1	-0.243861	-0.0657921	-16.226	2.63472e-47	4.37431e-46	96.7552
LOC283755	0.243784	-0.0854362	8.29411	1.17141e-15	3.29658e-15	24.4697
RANBP6	-0.243782	-0.199539	-10.9574	4.99108e-25	2.15149e-24	45.8027
MCL1	0.243712	0.0246607	18.0811	8.11496e-56	3.17732e-54	116.253
RUNX3	0.243451	0.00047616	15.831	1.59748e-45	2.3093e-44	92.6727
ABHD12B	-0.243398	-0.0834924	-15.8679	1.09025e-45	1.59876e-44	93.0526
SLC26A2	0.243358	0.0462362	12.6869	6.55355e-32	4.02793e-31	61.5218
SYT13	-0.243302	-0.107801	-16.0499	1.64824e-46	2.56478e-45	94.9316
LOC153277	0.243253	0.0294545	15.5649	2.4936e-44	3.32171e-43	89.94
C9orf4	-0.243223	-0.156548	-14.1473	4.35463e-38	3.84599e-37	75.6514
TNS1	0.243213	0.0150287	17.3525	1.88916e-52	5.12483e-51	108.539
NXN	0.243199	0.0578502	16.6856	2.14817e-49	4.31463e-48	101.539
KLHDC5	-0.243122	-0.210992	-11.9569	6.10006e-29	3.2088e-28	54.7369
CHCHD6	-0.24287	-0.0854638	-21.6408	1.6722e-72	6.46876e-70	154.488
HYAL2	0.242825	0.0613473	13.7146	3.15792e-36	2.49003e-35	71.3946
EPHX1	0.242805	0.0839516	16.7868	7.4149e-50	1.5589e-48	102.597
MLKL	0.242588	0.00721548	16.0908	1.07749e-46	1.70128e-45	95.3544
ABCA1	0.242582	0.00673989	16.9255	1.7208e-50	3.79517e-49	104.05
GSDMDC1	0.242504	0.0508142	18.7559	5.88298e-59	3.2511e-57	123.446
NFE2L2	0.242423	-0.0124991	19.5506	1.12933e-62	1.04017e-60	131.963
SLITRK5	-0.242252	-0.0446836	-12.9837	3.8476e-33	2.53908e-32	64.3369
OXGR1	-0.242169	-0.132866	-14.9467	1.39494e-41	1.51239e-40	83.6492
SIX5	0.242033	0.0471399	18.9582	6.68565e-60	4.1052e-58	125.611
CTSC	0.241988	-0.0253166	14.2554	1.48163e-38	1.3404e-37	76.7228
VASP	0.241945	0.025439	18.7815	4.46756e-59	2.50468e-57	123.72
FLJ35024	-0.241594	-0.156905	-8.84798	1.83309e-17	5.59678e-17	28.5701
RFX4	0.241533	-0.0406162	16.2692	1.67981e-47	2.85258e-46	97.2029
SLC1A5	0.241524	-0.0156566	17.3975	1.17213e-52	3.25737e-51	109.014
ARHGAP30	0.241352	-0.015891	18.1949	2.40432e-56	1.00735e-54	117.463
PDE1A	-0.241268	-0.153521	-12.5826	1.76193e-31	1.061e-30	60.5399
PJA2	-0.241081	-0.12197	-15.2039	1.01394e-42	1.19583e-41	86.2557
SLFN11	0.241042	0.00725228	19.2153	4.20074e-61	3.14925e-59	128.364
FHL2	-0.241004	-0.091735	-17.1077	2.51886e-51	6.12057e-50	105.962
ICAM2	0.241003	0.00750452	16.2021	3.38257e-47	5.55025e-46	96.5067
LOC348801	-0.241003	-0.0953621	-19.1225	1.1416e-60	7.91426e-59	127.369
FOXF1	0.24097	0.0801267	13.0857	1.44295e-33	9.77222e-33	65.3109
C7orf16	-0.240643	-0.134385	-11.4369	6.9899e-27	3.31532e-26	50.034
ST8SIA3	-0.240288	-0.125318	-15.9814	3.35723e-46	5.11303e-45	94.2241
LYVE1	0.240058	0.00995907	14.3374	6.52463e-39	6.04404e-38	77.5379
TRIM47	0.240022	0.0142047	17.8627	8.33954e-55	2.87017e-53	113.934
EIF1AY	-0.239981	-0.0782295	-7.14668	3.42947e-12	8.26164e-12	16.6199
PTPN5	-0.23997	-0.0434813	-18.9539	7.00156e-60	4.27205e-58	125.565
PCDH11Y	-0.239574	-0.0508416	-13.5942	1.02907e-35	7.86109e-35	70.221
FOXD1	0.239435	0.0800071	14.1988	2.60555e-38	2.32457e-37	76.1618
RFTN2	0.239404	-0.0114171	14.9401	1.49136e-41	1.6124e-40	83.5827
ANKRD55	-0.239252	-0.00367837	-16.4809	1.83771e-48	3.40144e-47	99.4039
CDH9	-0.23925	-0.0343643	-15.7938	2.34688e-45	3.35253e-44	92.2902
CYP1B1	0.239185	0.00124605	11.297	2.45267e-26	1.12737e-25	48.7894
MYO1F	0.239011	0.00157614	16.6809	2.25591e-49	4.51696e-48	101.49
DKFZP761N09121	-0.238921	-0.13135	-12.7148	5.02782e-32	3.11094e-31	61.7849
TPTE2	-0.238832	-0.120839	-12.5242	3.0604e-31	1.82024e-30	59.9918
TOX	-0.238732	-0.140359	-15.851	1.29832e-45	1.89382e-44	92.8789
CXorf21	0.238681	0.00497147	15.412	1.20134e-43	1.51871e-42	88.3766
TMEM169	-0.238512	-0.0886141	-21.7409	5.6487e-73	2.42794e-70	155.568
EMX2OS	0.238326	0.0279411	14.2491	1.57694e-38	1.42462e-37	76.6609
YWHAB	-0.238168	-0.0992536	-16.4219	3.40862e-48	6.14442e-47	98.7894
PGM2L1	-0.23813	-0.0667042	-17.0746	3.57037e-51	8.5468e-50	105.615
VNN1	0.238103	0.0138757	13.6115	8.69053e-36	6.66239e-35	70.3889
TAGLN3	-0.23808	-0.0358593	-18.2284	1.67961e-56	7.17151e-55	117.82
CLUL1	-0.237972	-0.167941	-9.47555	1.32233e-19	4.45119e-19	33.4418
TUBB3	-0.237947	0.00639607	-14.9635	1.17621e-41	1.28315e-40	83.8188
TOB2	0.237907	0.0415706	17.8737	7.41751e-55	2.58039e-53	114.051
WEE1	0.237805	0.0254832	17.4226	8.98026e-53	2.51734e-51	109.279
STS-1	-0.237781	-0.128744	-16.172	4.62774e-47	7.49662e-46	96.195
RELA	0.237735	0.00588049	19.6898	2.51423e-63	2.46854e-61	133.458
ADSS	-0.237407	-0.214459	-10.986	3.87807e-25	1.68108e-24	46.0528
LRIG1	0.237208	-0.000567732	14.7483	1.04325e-40	1.07447e-39	81.6489
LOC162073	0.237153	0.0421283	18.1486	3.94437e-56	1.60615e-54	116.971
TSPAN7	-0.236985	-0.0412409	-17.9412	3.60946e-55	1.31477e-53	114.768
MAP3K8	0.236737	-0.0111547	18.1311	4.75512e-56	1.91611e-54	116.785
GABBR2	-0.236718	-0.114585	-16.7121	1.62622e-49	3.30057e-48	101.816
FANCC	0.236712	0.00437075	18.6042	2.99903e-58	1.53458e-56	121.826
TSGA14	-0.236411	-0.113934	-16.164	5.02872e-47	8.11899e-46	96.1123
NPY	-0.236287	-0.170048	-11.2909	2.59062e-26	1.18908e-25	48.7351
PTPN20B	-0.236284	-0.0184098	-9.06425	3.43775e-18	1.08595e-17	30.2227
IL13RA2	-0.236278	-0.100901	-14.7781	7.71166e-41	8.00638e-40	81.9493
NIPSNAP1	-0.236274	-0.106478	-18.3043	7.45601e-57	3.31527e-55	118.628
PLAUR	0.236197	-0.0299829	15.4806	5.93583e-44	7.66428e-43	89.0776
CBLN1	-0.236142	-0.104685	-14.0784	8.64143e-38	7.49518e-37	74.9703
FOLH1	-0.236107	-0.250531	-7.13179	3.78143e-12	9.09027e-12	16.524
OTOS	0.236057	-0.006436	16.8274	4.83938e-50	1.03429e-48	103.022
DKFZP564O0823	-0.235938	-0.0586228	-13.9503	3.08048e-37	2.59055e-36	73.7072
SPEF1	-0.235917	-0.0671157	-18.492	9.98429e-58	4.86438e-56	120.629
BHLHB4	0.235594	0.0858796	18.5443	5.69939e-58	2.84118e-56	121.187
ELK1	0.235549	0.0144103	18.1568	3.61394e-56	1.48095e-54	117.058
SCN2A	-0.235527	-0.0682142	-15.9266	5.92826e-46	8.88182e-45	93.6586
MFAP4	0.235488	0.0912893	8.99446	5.91789e-18	1.84977e-17	29.6863
KCNB2	-0.235313	-0.0377321	-14.4898	1.41375e-39	1.36383e-38	79.058
SPARC	0.235312	-0.0346947	15.6639	8.98802e-45	1.23121e-43	90.9548
R3HDM1	-0.235295	-0.073577	-18.8491	2.16238e-59	1.27515e-57	124.442
NPY5R	-0.235165	-0.0967933	-14.942	1.46243e-41	1.58289e-40	83.6022
SNX10	-0.235092	-0.0608934	-16.8788	2.81465e-50	6.13766e-49	103.561
C14orf44	-0.234954	-0.163884	-16.7241	1.43327e-49	2.92122e-48	101.942
ITPR3	0.234866	-0.0117108	15.6882	6.99058e-45	9.65109e-44	91.2047
MTHFD2	0.234682	-0.0528548	12.4044	9.45885e-31	5.46945e-30	58.8717
HIF3A	0.234662	0.0583797	18.927	9.35389e-60	5.61873e-58	125.276
PRNP	-0.23465	-0.0990391	-13.5553	1.50729e-35	1.13972e-34	69.8418
C1orf165	-0.234616	-0.0874779	-21.0569	9.39359e-70	2.52348e-67	148.187
DOCK2	0.234523	-0.0192262	14.846	3.87655e-41	4.09728e-40	82.6331
FLRT1	-0.234472	-0.0409823	-16.0778	1.23287e-46	1.93714e-45	95.2204
CCDC103	-0.234424	-0.0729061	-11.769	3.42936e-28	1.73142e-27	53.024
PTPRN2	-0.234376	-0.0589286	-18.2785	9.82764e-57	4.29088e-55	118.353
PTPN20A///PTPN20B	-0.234317	-0.0144622	-9.23599	8.92427e-19	2.89668e-18	31.5549
CASP6	0.23428	0.00341163	18.1096	5.98141e-56	2.39529e-54	116.556
COPS4	-0.234189	-0.15763	-14.2995	9.53078e-39	8.72016e-38	77.1613
CTSS	0.234084	-0.0619978	13.3834	8.06692e-35	5.83946e-34	68.1754
C3orf14	-0.234053	-0.154239	-16.4875	1.71533e-48	3.19018e-47	99.4724
CNIH3	-0.233931	-0.063651	-16.5344	1.04924e-48	1.98576e-47	99.9614
SP8	-0.233885	0.0460588	-10.5057	2.52301e-23	1.0064e-22	41.9163
LOC158402	-0.233866	-0.0954557	-14.4338	2.48167e-39	2.35874e-38	78.4987
TUBA4A	-0.233831	0.00613853	-14.754	9.84167e-41	1.01578e-39	81.7069
LY86	0.233823	-0.102951	11.2116	5.2603e-26	2.375e-25	48.0329
COL4A1	0.233778	-0.0832049	9.19261	1.25671e-18	4.06003e-18	31.2167
LL22NC03-75B3.6	-0.233683	0.000244994	-20.0676	4.2337e-65	5.1828e-63	137.523
ATPIF1	-0.233612	-0.0595051	-20.65	7.73628e-68	1.39846e-65	143.797
PSTPIP2	0.233596	-0.0244108	14.0725	9.16664e-38	7.92939e-37	74.9117
STMN1	-0.233424	-0.130384	-18.3308	5.61448e-57	2.53136e-55	118.91
TCEAL7	-0.233417	-0.0795698	-20.1286	2.1888e-65	2.76705e-63	138.179
MGC33846	0.233399	-0.0217616	15.2033	1.02005e-42	1.20231e-41	86.2497
CTGF	0.233211	-0.055088	9.18204	1.36573e-18	4.40414e-18	31.1345
PHF19	0.233194	0.0349993	18.8349	2.51737e-59	1.46219e-57	124.291
TM6SF1	-0.233029	-0.130271	-15.2678	5.27046e-43	6.3239e-42	86.9062
TINAGL1	0.233017	0.117557	13.067	1.728e-33	1.1666e-32	65.1318
C9orf167	0.232973	0.0311048	16.2455	2.15177e-47	3.60655e-46	96.9566
CHAF1B	-0.232889	-0.0850983	-17.3952	1.20063e-52	3.3318e-51	108.99
KCNS2	-0.232828	-0.131697	-13.7451	2.33758e-36	1.85453e-35	71.6935
GRIN3A	-0.232633	-0.110502	-15.0906	3.22287e-42	3.66256e-41	85.1059
BOC	0.232506	0.0150491	18.9965	4.42977e-60	2.77284e-58	126.02
DRD5	-0.232397	-0.0531862	-14.7718	8.22348e-41	8.52404e-40	81.8854
M6PRBP1	0.232198	-0.0817215	13.7906	1.49394e-36	1.20299e-35	72.1383
DGCR6	0.232151	0.0554619	18.9208	9.99945e-60	5.9879e-58	125.21
TRIM56	0.232143	-0.0256689	16.9367	1.53026e-50	3.4021e-49	104.167
PTPRC	0.232098	-0.0602981	13.9813	2.26775e-37	1.91708e-36	74.0116
CHDH	0.231987	0.00820196	16.7497	1.09578e-49	2.25714e-48	102.209
LGI2	-0.231898	-0.0509382	-16.14	6.45446e-47	1.03432e-45	95.8641
PLSCR1	0.231728	0.0928775	12.4564	5.80136e-31	3.39618e-30	59.357
CCDC102A	0.231671	0.0197389	16.9702	1.07413e-50	2.42425e-49	104.519
PLCE1	0.231408	0.00435168	20.7694	2.12113e-68	4.31861e-66	145.085
STEAP3	0.231072	-0.0152281	17.5184	3.24893e-53	9.49258e-52	110.29
FLJ10781	-0.231017	-0.137551	-14.6907	1.86753e-40	1.89417e-39	81.0701
EYA2	0.230902	0.0910606	15.9017	7.67877e-46	1.14424e-44	93.4012
SLPI	0.230823	-0.0172475	9.81202	8.57618e-21	3.04815e-20	36.147
HTR2C	-0.230701	-0.0992111	-14.339	6.42092e-39	5.95081e-38	77.5539
GPRC5A	0.23068	0.0597514	11.3513	1.50882e-26	7.01191e-26	49.2711
NPPA	-0.230586	-0.0752701	-15.8684	1.08376e-45	1.59044e-44	93.0586
EFNA1	0.230521	-0.0560529	13.3406	1.22355e-34	8.76512e-34	67.7617
ECHDC3	0.230514	-0.0064045	15.1407	1.93304e-42	2.22818e-41	85.6141
CCR1	0.230089	-0.0660405	12.2108	5.79131e-30	3.21053e-29	57.0733
RALB	-0.230045	-0.142638	-15.5287	3.62173e-44	4.75894e-43	89.5689
SLC16A14	-0.229962	-0.0949521	-17.8109	1.44798e-54	4.8623e-53	113.385
STARD8	0.229918	0.0539661	17.3206	2.64644e-52	7.0506e-51	108.204
RXFP1	-0.229872	-0.162779	-11.6984	6.53317e-28	3.25263e-27	52.3847
OGFRL1	0.229661	-0.00590965	17.2783	4.14583e-52	1.08657e-50	107.757
VASN	0.229645	0.0190556	13.872	6.68778e-37	5.49745e-36	72.9369
HIST3H2BB	0.229497	-0.02031	16.2123	3.04015e-47	5.02586e-46	96.6129
DKFZP586K1520	-0.229315	-0.0793373	-19.2899	1.88044e-61	1.47852e-59	129.164
FGF13	-0.229311	-0.0662138	-20.6227	1.03924e-67	1.81091e-65	143.504
STON1	0.22916	-0.000642667	13.1027	1.22472e-33	8.3264e-33	65.4737
MAPK8	-0.229103	-0.116149	-12.4369	6.96978e-31	4.06298e-30	59.1748
ANXA5	0.229047	0.0131568	17.1665	1.35279e-51	3.3632e-50	106.58
C17orf72	-0.229045	-0.0479502	-16.4973	1.54786e-48	2.89263e-47	99.5746
PIM1	0.228513	-0.0843037	13.9481	3.14837e-37	2.64649e-36	73.6855
THBS1	0.228494	-0.0728109	9.88289	4.78289e-21	1.7237e-20	36.7246
DOK1	0.228377	0.0257428	20.8569	8.21151e-69	1.84682e-66	146.029
SLC25A18	0.228377	0.0751594	15.6055	1.64114e-44	2.21669e-43	90.356
NAP1L3	-0.228097	-0.106206	-13.7891	1.51532e-36	1.21919e-35	72.1242
NOD2	0.228093	-0.0170427	12.1482	1.03713e-29	5.67794e-29	56.4951
HSPA8	-0.228086	-0.0249469	-11.4233	7.90173e-27	3.73497e-26	49.9125
AFF1	0.228039	0.0310127	24.2315	1.1266e-84	5.44766e-81	182.378
SEC23A	-0.227963	-0.209916	-10.5109	2.41445e-23	9.63687e-23	41.9598
GFRA2	-0.227956	-0.0968362	-12.2189	5.36938e-30	2.98261e-29	57.1484
UHRF1	0.227897	-0.0602069	14.6907	1.86725e-40	1.89417e-39	81.0702
TMEM158	-0.227794	-0.0521912	-20.3669	1.66016e-66	2.48921e-64	140.746
ELTD1	0.227724	-0.00112135	16.9707	1.06892e-50	2.41531e-49	104.524
CSF3R	0.227706	0.0482273	13.3283	1.37943e-34	9.84173e-34	67.6426
UBLCP1	-0.227682	-0.0724649	-20.7838	1.81429e-68	3.77334e-66	145.241
EFNA4	0.22753	0.0316901	20.5175	3.24764e-67	5.32337e-65	142.37
PHF14	-0.227488	-0.117806	-16.1099	8.83055e-47	1.40692e-45	95.5523
HEYL	0.227395	0.0318282	13.2341	3.43821e-34	2.40426e-33	66.7354
DOCK8	0.227371	-0.108902	12.8689	1.15683e-32	7.39436e-32	63.2438
NRXN1	-0.227162	-0.118801	-14.5566	7.21985e-40	7.05998e-39	79.7259
NDUFA5	-0.227123	-0.0825103	-16.099	9.89157e-47	1.56822e-45	95.4395
ARPC1B	0.227041	-0.0327876	16.4684	2.09443e-48	3.84715e-47	99.2738
FAM129A	0.226916	0.0250344	13.4833	3.04713e-35	2.25988e-34	69.1426
KCNIP3	-0.226906	-0.00248737	-15.7651	3.15739e-45	4.46747e-44	91.9951
NALCN	-0.226785	-0.15846	-13.1497	7.78087e-34	5.34627e-33	65.9243
LOC153328	0.226652	-0.0493084	10.8428	1.36199e-24	5.74434e-24	44.808
TGFBI	0.226552	-0.00236787	8.86539	1.60369e-17	4.90799e-17	28.7021
STXBP1	-0.226545	0.0205899	-14.8901	2.47967e-41	2.6469e-40	83.0773
LY96	0.226531	0.00403553	14.3919	3.78013e-39	3.54928e-38	78.0804
ZNF217	0.226481	-0.0322554	16.7582	1.00168e-49	2.06992e-48	102.298
DDR1	0.22647	0.0493336	16.0213	2.2187e-46	3.43313e-45	94.636
CLSTN3	-0.226382	-0.0139721	-16.7617	9.65018e-50	2.00272e-48	102.335
KIAA0500	0.226348	-0.0914981	10.7329	3.5511e-24	1.46638e-23	43.8585
GPR56	0.226341	0.0389783	16.2526	1.99694e-47	3.35576e-46	97.0309
CAMKK2	-0.226238	-0.0601679	-15.273	4.99801e-43	6.00444e-42	86.959
GPR65	0.226154	-0.00644725	13.177	5.97917e-34	4.12443e-33	66.1858
KCNN3	0.226058	-0.0123723	13.5331	1.87344e-35	1.40777e-34	69.6258
MYC	0.225936	0.0031528	14.0808	8.43911e-38	7.32956e-37	74.9939
PNRC1	0.225932	0.029446	22.0487	2.00752e-74	1.0786e-71	158.889
SYK	0.225908	-0.0291378	16.0096	2.50496e-46	3.8668e-45	94.5153
LOC284454	0.225803	0.030331	16.7375	1.24457e-49	2.55274e-48	102.082
BMP6	0.225625	-0.00281291	15.1436	1.87693e-42	2.16737e-41	85.6434
KIT	-0.225615	-0.070911	-13.8291	1.02182e-36	8.30772e-36	72.5157
HACL1	-0.225579	-0.125343	-16.4553	2.40154e-48	4.39457e-47	99.1377
KIAA1524	-0.22548	-0.00429158	-13.657	5.56127e-36	4.31992e-35	70.8324
DPP10	-0.225411	-0.0279406	-16.5411	9.77828e-49	1.85605e-47	100.031
TUBA1A	-0.225171	-0.0734071	-16.283	1.45408e-47	2.48672e-46	97.3465
GABRA4	-0.225144	-0.144156	-12.2726	3.25358e-30	1.82991e-29	57.6456
PGCP	0.224996	0.00970992	20.5725	1.79133e-67	3.06618e-65	142.962
CD59	0.224974	0.000512994	20.8309	1.0888e-68	2.40292e-66	145.749
ARID5A	0.224912	0.0429766	13.6408	6.51909e-36	5.04773e-35	70.6745
VKORC1L1	-0.224842	-0.0178836	-21.35	3.91546e-71	1.35237e-68	151.35
CAPG	0.224665	-0.0150032	15.5062	4.5643e-44	5.94896e-43	89.3389
OXCT1	-0.224611	-0.153958	-15.6431	1.11351e-44	1.51779e-43	90.7418
HIVEP2	-0.224607	-0.149996	-15.3834	1.61204e-43	2.01291e-42	88.0841
STX1A	-0.224513	0.00475993	-17.8679	7.88675e-55	2.72403e-53	113.99
ADIPOR2	0.224328	-0.0383459	15.3584	2.08195e-43	2.5797e-42	87.8298
NDRG1	0.224278	0.0401755	13.567	1.3445e-35	1.02062e-34	69.9554
NAP1L2	-0.224125	-0.0628117	-14.962	1.19379e-41	1.30086e-40	83.804
SEZ6L2	-0.2241	-0.0857075	-15.2009	1.04462e-42	1.22902e-41	86.226
ZBTB16	0.223977	0.0481642	18.2108	2.02757e-56	8.57657e-55	117.633
FLJ23049	-0.223941	-0.11102	-14.0576	1.06316e-37	9.15564e-37	74.7644
CDKN3	-0.223925	-0.0941031	-15.4593	7.38856e-44	9.47047e-43	88.8599
CDKN2D	-0.223886	0.0154558	-23.5906	1.13157e-81	2.18868e-78	175.5
EDN3	-0.223613	-0.0393977	-11.732	4.80938e-28	2.40805e-27	52.6885
HIST2H2BE	0.22334	-0.011642	12.9056	8.13736e-33	5.25519e-32	63.5931
C10orf35	-0.223297	-0.0993469	-19.0631	2.16332e-60	1.42323e-58	126.733
RIN3	0.223261	0.0312148	17.7172	3.92672e-54	1.25331e-52	112.393
SDC2	0.222852	0.0432986	15.4813	5.89802e-44	7.62054e-43	89.084
RNASET2	0.222594	-0.00156055	17.1692	1.3146e-51	3.27667e-50	106.609
LMO3	-0.222564	-0.15287	-12.5695	1.99421e-31	1.19789e-30	60.417
TBR1	-0.222337	-0.17924	-12.3493	1.58657e-30	9.06839e-30	58.3584
PCSK2	-0.222331	-0.0937606	-12.7475	3.68404e-32	2.29269e-31	62.0936
CBFB	0.2223	-0.0244382	17.1304	1.97999e-51	4.8724e-50	106.201
KRT222P	-0.222254	-0.106907	-17.1828	1.13798e-51	2.84745e-50	106.752
NRGN	-0.222228	-0.0145187	-12.6843	6.71846e-32	4.12404e-31	61.4971
FAM59B	0.222107	0.0364345	13.9508	3.06534e-37	2.57894e-36	73.7121
TCEAL6	-0.222083	-0.115377	-15.6227	1.37445e-44	1.86427e-43	90.5324
ELAVL2	-0.222046	-0.116373	-14.573	6.11996e-40	6.0271e-39	79.8902
FXYD6	-0.222	0.0710169	-15.1241	2.2908e-42	2.62648e-41	85.4453
SERPINA1	0.221918	-0.0127443	14.265	1.34642e-38	1.21979e-37	76.8179
SRD5A3	-0.221829	-0.0641128	-14.1095	6.34458e-38	5.54527e-37	75.2774
PPP3CB	-0.221786	-0.0558599	-16.286	1.40928e-47	2.41437e-46	97.3776
CD37	0.221737	0.0171564	15.0459	5.0835e-42	5.70331e-41	84.6528
VLDLR	-0.22172	-0.11357	-17.2698	4.53269e-52	1.17838e-50	107.668
STK3	0.221682	-0.0211139	19.1809	6.0837e-61	4.44041e-59	127.996
GPR34	0.221602	-0.122357	9.24623	8.23047e-19	2.67552e-18	31.6348
NXPH3	-0.221588	0.00307389	-14.854	3.57555e-41	3.78535e-40	82.7134
HECW2	-0.221446	-0.118767	-17.9703	2.64666e-55	9.71378e-54	115.076
C7orf53	0.221386	-0.0468409	12.8255	1.75146e-32	1.10745e-31	62.8319
TOMM70A	-0.221245	-0.156111	-16.7596	9.8726e-50	2.04231e-48	102.312
ACP1	-0.221197	-0.0277298	-22.0595	1.78526e-74	9.86587e-72	159.006
SUB1	-0.221194	-0.0700786	-19.1667	7.09297e-61	5.13829e-59	127.843
SORCS3	-0.220891	-0.0835769	-19.4139	4.93557e-62	4.16873e-60	130.495
ID4	0.220826	-0.00557752	12.7338	4.1969e-32	2.60432e-31	61.9642
CTXN3	-0.220627	-0.159908	-9.54451	7.58683e-20	2.58353e-19	33.9911
SLC26A6	0.220613	0.0374287	18.8707	1.71316e-59	1.01333e-57	124.674
TJP2	0.22052	-0.0383459	12.4224	7.99057e-31	4.64683e-30	59.0392
LINGO1	-0.220399	0.0132005	-14.6862	1.95459e-40	1.98143e-39	81.0248
C3orf26	-0.220365	-0.0837845	-19.5113	1.72556e-62	1.55962e-60	131.541
GRP	-0.220349	-0.0512013	-18.9133	1.08345e-59	6.46794e-58	125.13
SGIP1	-0.220335	-0.111845	-19.5515	1.11878e-62	1.03538e-60	131.972
SCAMP1	-0.220273	-0.114886	-12.3864	1.1206e-30	6.46042e-30	58.7035
TSPAN5	-0.220251	-0.146037	-14.0597	1.04064e-37	8.96974e-37	74.7856
SOBP	-0.220238	-0.112505	-21.0708	8.0865e-70	2.20294e-67	148.336
SLC9A9	0.219871	-0.0177047	17.3765	1.46444e-52	4.00638e-51	108.792
WNT2	-0.219863	-0.118466	-12.0323	3.03947e-29	1.6191e-28	55.4281
PTPN3	-0.219846	-0.100479	-17.5448	2.45566e-53	7.22943e-52	110.569
SPRY4	-0.219831	0.030177	-14.4719	1.69305e-39	1.62677e-38	78.8788
HAS1	-0.219739	-0.00350146	-16.2065	3.22887e-47	5.31135e-46	96.553
CDKN1C	0.219696	-0.0342993	10.7729	2.50706e-24	1.04171e-23	44.2034
TMEM17	-0.219695	-0.0615545	-16.2218	2.75507e-47	4.56629e-46	96.7108
BAZ1A	0.219624	-0.0202305	17.9126	4.89624e-55	1.75376e-53	114.464
MEF2C	-0.219512	-0.119882	-11.4453	6.47803e-27	3.07858e-26	50.1094
SULT1B1	0.219511	-0.0308395	12.458	5.7136e-31	3.34582e-30	59.3721
GSN	0.219423	0.0701914	14.1411	4.63061e-38	4.08787e-37	75.5903
CNN3	0.219355	-0.0463737	13.0738	1.61772e-33	1.09367e-32	65.1973
INPPL1	0.21935	0.0601659	18.4767	1.17722e-57	5.65005e-56	120.465
KCTD8	-0.219247	-0.132172	-15.8934	8.36976e-46	1.24242e-44	93.3155
BTG1	0.219213	-0.0217743	20.5405	2.53213e-67	4.23395e-65	142.617
NPTN	-0.219204	-0.0788338	-16.1259	7.47926e-47	1.19755e-45	95.7175
KMO	-0.219132	-0.0239367	-14.8767	2.83976e-41	3.02293e-40	82.9425
EID2	-0.219004	-0.149393	-16.6216	4.20761e-49	8.25391e-48	100.87
DHRS3	0.218904	0.0161203	18.8416	2.34199e-59	1.37269e-57	124.363
TCEAL5	-0.218808	-0.076563	-20.6735	5.99449e-68	1.10424e-65	144.051
SUSD4	-0.218766	-0.0798095	-16.244	2.18397e-47	3.65102e-46	96.9419
NQO1	0.218496	-0.054676	11.0187	2.90679e-25	1.26657e-24	46.3385
SPA17	-0.218493	-0.0800698	-17.5881	1.54996e-53	4.66967e-52	111.027
HLA-DRB1	0.218334	-0.109205	11.9513	6.42564e-29	3.37638e-28	54.6854
TncRNA	0.218315	0.0179349	10.5645	1.52323e-23	6.12266e-23	42.416
FAM81A	-0.218306	-0.0930761	-16.0594	1.49351e-46	2.32963e-45	95.0297
IMPG1	-0.218295	-0.091218	-14.1275	5.30493e-38	4.66294e-37	75.4552
DGKG	0.218293	0.0470023	17.0122	6.90031e-51	1.59457e-49	104.959
SLC39A11	0.218284	0.0108748	15.9177	6.50544e-46	9.73149e-45	93.5662
GPC4	0.218178	-0.0276579	15.9983	2.81739e-46	4.33524e-45	94.3984
LOC112703	-0.218099	-0.0322907	-20.097	3.07986e-65	3.84327e-63	137.839
LOC653506	0.218088	0.0485608	13.8863	5.80426e-37	4.79564e-36	73.0777
SYNJ1	-0.217947	-0.106973	-13.7931	1.4577e-36	1.17478e-35	72.1627
TSPO	0.217912	0.0221171	19.4658	2.82119e-62	2.46911e-60	131.052
BBOX1	0.217774	0.0163747	12.5489	2.4244e-31	1.45134e-30	60.2231
PPM2C	-0.217691	-0.096956	-13.3807	8.2848e-35	5.98822e-34	68.149
FCGR1A	0.217669	-0.0331343	11.4964	4.08616e-27	1.96554e-26	50.5664
CUX2	-0.217654	-0.0770758	-12.3549	1.50535e-30	8.61433e-30	58.4105
PDGFRB	0.217646	0.112126	15.8135	1.91507e-45	2.74991e-44	92.4924
TRIP6	0.217601	0.042443	18.1035	6.38398e-56	2.54072e-54	116.491
RAB27B	-0.217493	-0.0765232	-15.1251	2.26675e-42	2.60199e-41	85.4558
TUBAL3	0.217429	-0.0252347	12.5027	3.74991e-31	2.214e-30	59.7901
PLEK	0.217314	-0.0987013	11.9809	4.88808e-29	2.58321e-28	54.9567
MSR1	0.217274	-0.0336322	16.3934	4.59211e-48	8.19379e-47	98.4929
C14orf129	-0.217164	-0.100526	-15.1754	1.35555e-42	1.57946e-41	85.967
DBI	0.217103	0.00843516	20.3586	1.81507e-66	2.65963e-64	140.657
ISYNA1	0.217034	0.0623757	13.2385	3.2947e-34	2.30808e-33	66.7778
GPR177	0.217026	0.0147382	16.3088	1.11123e-47	1.92249e-46	97.6139
PGAM1	-0.217009	0.0390948	-18.7254	8.1674e-59	4.46254e-57	123.12
NGFRAP1	-0.216996	0.0279131	-18.2981	7.96794e-57	3.53477e-55	118.562
CCDC88B	0.216872	0.0223411	16.7632	9.50445e-50	1.98098e-48	102.35
SMYD2	-0.216774	-0.115023	-15.2827	4.52399e-43	5.46211e-42	87.0581
GABARAPL1	-0.216734	-0.00938189	-19.1205	1.16607e-60	8.05502e-59	127.348
CRYBB2	-0.216733	-0.124574	-8.75898	3.62077e-17	1.09154e-16	27.8983
SLC12A5	-0.216366	-0.0991515	-12.8538	1.33603e-32	8.51448e-32	63.1008
CNTN4	-0.216213	-0.0712941	-15.5885	1.95453e-44	2.62167e-43	90.1822
YWHAZ	-0.216162	-0.06758	-17.8993	5.64361e-55	2.01029e-53	114.323
GRHL1	-0.216091	-0.0884709	-13.8882	5.69969e-37	4.71126e-36	73.0958
GNRH1	0.216064	0.00308586	23.5557	1.64995e-81	2.90121e-78	175.124
JAKMIP1	-0.216022	-0.0642751	-17.7724	2.18299e-54	7.19308e-53	112.977
EVI1	0.216021	-0.0245439	14.5953	4.89215e-40	4.83762e-39	80.1128
RP13-102H20.1	-0.216007	-0.0346355	-16.4823	1.81119e-48	3.36199e-47	99.4183
C14orf126	-0.215975	-0.0447074	-15.6412	1.13547e-44	1.54664e-43	90.7223
GLI1	0.215948	0.0618876	14.1182	5.81926e-38	5.09996e-37	75.3632
HAP1	0.215683	0.0484852	20.463	5.86145e-67	9.3696e-65	141.782
XKR4	-0.215682	-0.128992	-15.5649	2.49267e-44	3.32171e-43	89.9404
KCNK3	-0.215662	-0.0595749	-17.422	9.0337e-53	2.52865e-51	109.273
CXCL2	0.215655	0.0421737	8.7328	4.4197e-17	1.3268e-16	27.7016
ELAVL4	-0.215628	-0.066751	-14.6469	2.90554e-40	2.91488e-39	80.6307
HIST1H2AC	0.215452	-0.0569425	13.0249	2.59053e-33	1.73078e-32	64.7297
SERTAD1	0.215424	0.00825396	16.785	7.55705e-50	1.58706e-48	102.578
CLGN	-0.215423	-0.0907725	-12.3849	1.13625e-30	6.54675e-30	58.6897
MDH2	-0.215388	-0.111901	-18.1149	5.65534e-56	2.26941e-54	116.612
LRRC8B	-0.215309	-0.120058	-13.982	2.2519e-37	1.90452e-36	74.0185
NGEF	-0.215187	-0.0662532	-17.5136	3.42075e-53	9.97952e-52	110.239
RGL3	0.215095	0.101545	10.1262	6.31237e-22	2.36891e-21	38.7286
SLC43A3	0.215091	-0.0255023	15.5119	4.30544e-44	5.61915e-43	89.3969
UCHL5	-0.215043	-0.105958	-17.2641	4.81528e-52	1.24349e-50	107.608
FBXL17	-0.215014	-0.0814191	-15.1628	1.54292e-42	1.79239e-41	85.8382
DTNA	0.214971	-0.0478838	15.7499	3.69727e-45	5.2199e-44	91.8382
PLEKHB2	-0.214901	-0.0908429	-17.3121	2.89822e-52	7.71077e-51	108.113
HLA-DRB6	0.214823	-0.0454133	9.96018	2.52199e-21	9.19168e-21	37.3578
LOC338758	-0.214772	-0.0625663	-17.0714	3.6935e-51	8.81462e-50	105.581
NIT2	-0.214736	-0.133415	-12.6762	7.25847e-32	4.44846e-31	61.4203
POLR3K	-0.214705	-0.145783	-16.4074	3.96379e-48	7.09885e-47	98.6393
TMCO4	0.214682	0.027376	18.3621	4.01845e-57	1.82882e-55	119.243
MVP	0.214541	-0.023153	13.8503	8.28948e-37	6.7795e-36	72.7236
TRAPPC2L	-0.214433	-0.0831916	-17.6639	6.92242e-54	2.15957e-52	111.829
SAMSN1	0.214425	-0.0601915	11.5393	2.77287e-27	1.34186e-26	50.9509
UBE2NL	-0.214416	-0.148301	-12.8372	1.56652e-32	9.93103e-32	62.9427
NEFM	-0.214391	-0.0918272	-15.0673	4.08525e-42	4.61278e-41	84.8701
SMTN	0.214172	0.0498003	15.8406	1.44559e-45	2.096e-44	92.7721
GABRB3	-0.214164	-0.106056	-12.6244	1.18674e-31	7.21144e-31	60.9323
IQWD1	-0.214115	-0.110757	-16.7359	1.2668e-49	2.59285e-48	102.064
AQP11	-0.2141	-0.0735107	-17.0711	3.7071e-51	8.8304e-50	105.577
GBP1	0.214073	-0.162782	9.03926	4.1773e-18	1.31463e-17	30.0303
SOD3	0.214068	0.124066	11.7071	6.03245e-28	3.00566e-27	52.4637
ENTPD3	-0.213651	-0.110901	-13.1616	6.93356e-34	4.77086e-33	66.0388
FAM46A	0.213556	0.0333121	13.9017	4.98596e-37	4.13012e-36	73.2287
WWTR1	0.213503	0.0129663	15.0939	3.11503e-42	3.54417e-41	85.1397
NMNAT2	-0.213494	-0.0448943	-14.7902	6.82733e-41	7.10733e-40	82.0704
DNA2L	0.213431	-0.0293487	14.9829	9.65439e-42	1.061e-40	84.0151
STAT3	0.213396	-0.00821372	19.2964	1.75258e-61	1.38361e-59	129.234
PAR5	-0.213361	-0.120358	-10.8231	1.61763e-24	6.78999e-24	44.6375
LRRC2	-0.213271	-0.0661415	-11.2853	2.72305e-26	1.24838e-25	48.6857
MMD	-0.213245	-0.0518474	-16.3196	9.92603e-48	1.72188e-46	97.7262
SVIL	0.21321	0.0292507	13.3056	1.71906e-34	1.21884e-33	67.4239
ARMC3	0.213203	0.0117336	17.2766	4.21766e-52	1.1039e-50	107.74
GPR26	-0.213146	-0.0440421	-11.9026	1.00627e-28	5.23346e-28	54.2403
DSC2	0.212956	-0.051696	16.1153	8.35e-47	1.33255e-45	95.608
WNT6	0.212697	0.0672198	12.8392	1.53575e-32	9.74879e-32	62.9624
LSS	0.212616	0.0152346	16.964	1.1475e-50	2.58683e-49	104.453
NPL	0.212587	-0.039714	12.2689	3.36803e-30	1.89208e-29	57.6112
NDUFAB1	-0.21252	-0.0442819	-17.0337	5.5011e-51	1.28661e-49	105.185
PIK3CB	-0.21245	-0.187798	-11.6403	1.10846e-27	5.45821e-27	51.8603
FAM40B	-0.212366	-0.0163856	-18.1642	3.33813e-56	1.37083e-54	117.137
GLT1D1	-0.212303	-0.0548315	-16.1883	3.90465e-47	6.36794e-46	96.364
LGI4	0.212288	0.0384185	16.1947	3.65067e-47	5.97388e-46	96.4309
SERTAD3	0.212245	0.0328481	19.3147	1.43865e-61	1.15943e-59	129.431
LRRC49	-0.212236	-0.126605	-15.335	2.64731e-43	3.25106e-42	87.5909
ENO2	-0.212195	-0.103978	-14.4839	1.50053e-39	1.44538e-38	78.9988
TDRD5	-0.212051	-0.1284	-12.2137	5.64051e-30	3.12783e-29	57.0995
CRABP1	0.211962	0.054562	10.0876	8.71791e-22	3.24835e-21	38.409
TOX3	-0.211915	-0.0917644	-15.8753	1.00919e-45	1.48779e-44	93.1295
PERP	0.211869	0.0132373	15.1787	1.31132e-42	1.53162e-41	85.9999
TIMM8A	-0.211863	-0.0715235	-17.0813	3.3267e-51	7.99316e-50	105.685
SNURF	-0.211687	-0.0635588	-15.8413	1.43496e-45	2.08215e-44	92.7794
EMP2	0.211686	0.0107614	14.951	1.3352e-41	1.45168e-40	83.6927
FOXO4	0.21168	0.0967626	13.4509	4.18186e-35	3.07667e-34	68.8281
ME3	-0.211638	-0.0737348	-17.2996	3.30576e-52	8.69932e-51	107.982
CDH5	0.211557	0.0394666	12.5591	2.20053e-31	1.31896e-30	60.3192
RHOC	0.211532	0.0463252	16.6043	5.04377e-49	9.81455e-48	100.69
ACSBG1	0.211489	0.0851372	15.4197	1.11006e-43	1.40792e-42	88.4551
HRASLS	-0.211461	-0.0562082	-17.9781	2.43473e-55	8.98712e-54	115.159
GNG12	0.211405	-0.0155144	15.3101	3.4168e-43	4.1617e-42	87.3372
MLSTD1	-0.211393	-0.132697	-15.0691	4.01314e-42	4.53401e-41	84.8878
NOL4	-0.211387	-0.115192	-16.0672	1.37659e-46	2.15596e-45	95.1107
NUDT4P1	-0.211213	-0.201791	-9.78893	1.03679e-20	3.67415e-20	35.9593
TIPARP	0.21121	-0.0303381	14.4511	2.08681e-39	1.99473e-38	78.671
B3GALNT1	-0.211157	-0.104289	-15.5746	2.25705e-44	3.0149e-43	90.0391
VAT1	0.211091	0.0471312	18.0917	7.2438e-56	2.84776e-54	116.366
HLA-DRB4	0.210941	0.00647185	13.8808	6.1303e-37	5.06286e-36	73.0234
C17orf76	-0.210931	-0.0243738	-21.3197	5.44014e-71	1.81419e-68	151.022
FBXL7	0.210915	0.0215902	16.5529	8.64207e-49	1.64522e-47	100.154
PRMT6	-0.210734	-0.0613544	-17.4431	7.22761e-53	2.05583e-51	109.495
MOBKL3	-0.210686	-0.139835	-15.02	6.61421e-42	7.36087e-41	84.3911
TRPC3	-0.210593	-0.088152	-14.8655	3.17994e-41	3.37947e-40	82.83
VDAC2	-0.210528	-0.0960916	-17.2147	8.12537e-52	2.05439e-50	107.088
SLC25A4	-0.210517	-0.0777926	-16.8547	3.63085e-50	7.82921e-49	103.308
SRPX	0.21048	0.000435206	15.6574	9.60712e-45	1.31322e-43	90.8885
TAGLN2	0.210428	0.0514315	16.8247	4.97864e-50	1.06288e-48	102.993
SUSD1	-0.21037	-0.0706455	-15.1628	1.54191e-42	1.79228e-41	85.8389
SYNGR3	-0.210302	-0.0244088	-14.5833	5.51677e-40	5.44415e-39	79.9934
LRCH4	0.210151	0.0208784	15.8131	1.92326e-45	2.75962e-44	92.4881
HMGCLL1	-0.210102	-0.0775206	-13.5792	1.19209e-35	9.07774e-35	70.0749
FBXL2	-0.210024	-0.058222	-16.8309	4.66193e-50	9.98571e-49	103.059
PGAM2	0.209916	-0.0549663	12.7152	5.00986e-32	3.10111e-31	61.7884
TM7SF2	-0.209889	-0.0737209	-18.3044	7.44985e-57	3.31527e-55	118.629
LOC440248	0.209855	0.0375365	12.9892	3.65029e-33	2.41299e-32	64.3892
GRAMD1B	-0.209733	-0.0445993	-13.3279	1.3849e-34	9.8771e-34	67.6386
KCNAB1	-0.209669	-0.104129	-15.9975	2.84194e-46	4.36606e-45	94.3898
FGF7	-0.209641	-0.134765	-11.0328	2.5666e-25	1.12011e-24	46.4619
NDN	-0.209574	-0.0976294	-16.9294	1.65151e-50	3.65069e-49	104.091
TAP1	0.209541	-0.0206948	15.8256	1.68942e-45	2.43857e-44	92.617
FRZB	0.209413	0.012511	7.91836	1.7613e-14	4.69372e-14	21.8003
HEBP2	0.20932	0.0338393	16.3514	7.12095e-48	1.24872e-46	98.0566
RTEL1	0.209293	0.0354563	13.1079	1.16486e-33	7.93059e-33	65.5235
FLJ10357	0.209107	-0.00564683	17.5494	2.33864e-53	6.91652e-52	110.617
GAGE6	0.20888	-0.0136658	11.4272	7.62923e-27	3.61058e-26	49.9473
ALPPL2	0.208842	0.0636668	19.3815	6.99934e-62	5.81035e-60	130.148
COL18A1	0.208781	0.0422355	13.5323	1.88766e-35	1.41736e-34	69.6183
CALD1	0.208742	-0.0541898	12.9568	4.98406e-33	3.26012e-32	64.0799
PPP1R14BP1	0.20871	0.0525398	16.7469	1.12837e-49	2.3218e-48	102.18
LEPREL1	0.208678	-0.00367076	16.4854	1.7523e-48	3.25581e-47	99.4512
TERF2IP	-0.208675	-0.130151	-16.6682	2.57937e-49	5.13274e-48	101.357
SCARA3	0.208587	0.00198967	15.2564	5.92164e-43	7.07015e-42	86.7904
TUBA1C	-0.208584	0.0846744	-16.7634	9.48655e-50	1.97938e-48	102.352
CST7	0.208574	0.00527985	10.4878	2.94307e-23	1.17178e-22	41.7637
LOC390616	-0.208543	-0.0865423	-12.1492	1.02835e-29	5.63146e-29	56.5035
LOC441666///LOC283027	-0.208531	-0.0705567	-11.4318	7.31574e-27	3.46307e-26	49.9889
C6orf57	-0.208528	0.065704	-18.4359	1.82204e-57	8.53314e-56	120.03
FLI1	0.208499	-0.0224435	15.1953	1.10702e-42	1.29927e-41	86.1683
CCNA1	-0.208445	-0.0799195	-16.7143	1.5886e-49	3.2276e-48	101.839
SNF1LK	0.20825	0.00875114	9.08443	2.93666e-18	9.30856e-18	30.3783
KCNJ6	-0.20822	-0.132566	-12.7632	3.17303e-32	1.98361e-31	62.2419
REEP1	-0.208213	-0.0788371	-15.1573	1.6314e-42	1.89403e-41	85.7828
DDAH2	0.207859	0.053954	18.0232	1.50526e-55	5.70876e-54	115.638
INHBB	0.207822	-0.00904782	14.6098	4.2227e-40	4.18849e-39	80.2591
ELF1	0.207757	0.0314138	17.1191	2.23241e-51	5.4796e-50	106.082
HBQ1	-0.207714	-0.0683032	-15.7837	2.6068e-45	3.70741e-44	92.1857
ID3	0.207691	-0.0100347	17.0038	7.53992e-51	1.73409e-49	104.871
RCC1	0.207571	0.0298	13.3447	1.17563e-34	8.42497e-34	67.8013
MXI1	0.207545	0.0326519	20.941	3.30263e-69	7.79017e-67	146.936
KLF2	0.207485	0.0795835	9.38612	2.70748e-19	8.97945e-19	32.7335
ERBB2	0.207468	0.0527727	13.1985	4.85383e-34	3.36498e-33	66.3929
BDH2	0.207428	-0.0410394	15.7215	4.95909e-45	6.90308e-44	91.5461
PLEKHA7	0.2074	-0.000950777	16.8167	5.41425e-50	1.1546e-48	102.91
ANK3	-0.207267	-0.139022	-15.3628	1.99056e-43	2.47121e-42	87.8744
NEDD4	0.207161	-0.0200966	17.6346	9.45412e-54	2.89797e-52	111.519
BCAS2	-0.207157	-0.115359	-17.7739	2.14865e-54	7.10414e-53	112.993
GNG5	0.207144	0.0352613	17.0273	5.88236e-51	1.36751e-49	105.118
GPRASP2	-0.207134	-0.0816821	-16.7822	7.78045e-50	1.63221e-48	102.549
SOX2	0.207026	0.00664532	14.0779	8.68488e-38	7.5295e-37	74.9653
ATP2A2	-0.20696	-0.0541599	-17.5582	2.12875e-53	6.32477e-52	110.711
SLC16A1	0.206891	-0.0433568	9.78981	1.02931e-20	3.649e-20	35.9664
TMEM16B	0.206796	0.0535206	16.7621	9.61757e-50	1.9981e-48	102.338
STK32C	-0.206779	-0.0424873	-17.0804	3.35764e-51	8.04752e-50	105.676
SDC4	0.20669	-0.00686159	9.49191	1.15931e-19	3.91196e-19	33.5719
CHSY1	0.206619	0.0179999	16.6776	2.33665e-49	4.66896e-48	101.455
ZWILCH	-0.206562	-0.0806369	-14.2683	1.30277e-38	1.1814e-37	76.8507
CDCA5	-0.206318	-0.115377	-15.3471	2.33973e-43	2.8917e-42	87.7137
RBM9	-0.206253	-0.0316687	-20.1489	1.75738e-65	2.23627e-63	138.398
TRHDE	-0.206129	-0.106871	-12.848	1.41249e-32	8.984e-32	63.0455
SRGAP1	0.206128	0.0153326	16.5167	1.26371e-48	2.37077e-47	99.7764
CPT1B	0.205947	-0.0134775	16.7248	1.42284e-49	2.90301e-48	101.949
ACSF2	0.205744	0.0651845	16.1786	4.31832e-47	7.01891e-46	96.2638
CLTC	-0.205741	-0.14217	-11.5424	2.69637e-27	1.30677e-26	50.9787
PRKX	0.205719	-0.0225513	15.8694	1.07312e-45	1.57843e-44	93.0684
ARMCX4	-0.205616	-0.166703	-15.7732	2.90328e-45	4.12301e-44	92.0786
ACADL	0.205549	0.0274552	12.0712	2.12051e-29	1.13962e-28	55.7854
NRG3	-0.205338	-0.0984322	-15.2903	4.18413e-43	5.06125e-42	87.1357
MAP2	-0.20515	-0.0198145	-14.0602	1.0356e-37	8.93026e-37	74.7905
TBL1X	0.20515	0.0773339	18.1881	2.5857e-56	1.07786e-54	117.391
ACSS3	0.205108	0.0309544	14.9709	1.09044e-41	1.19295e-40	83.894
LNX1	-0.205056	-0.147869	-11.8511	1.61518e-28	8.30652e-28	53.7709
ACTL6A	0.205027	-0.018759	15.2459	6.59704e-43	7.83783e-42	86.683
RGS18	0.205014	0.00962532	12.8687	1.15864e-32	7.40349e-32	63.2422
PTGDR	0.205009	0.0246727	7.92563	1.67277e-14	4.4621e-14	21.851
SLC25A27	-0.204935	-0.125581	-15.2471	6.512e-43	7.74632e-42	86.6959
JUP	0.204885	0.130329	11.6231	1.29698e-27	6.36705e-27	51.7045
PI16	0.204871	0.00205509	12.7875	2.5156e-32	1.58027e-31	62.4724
MGST1	0.204701	0.0122434	14.0247	1.47405e-37	1.25822e-36	74.4396
TGFB3	0.204692	-0.0223232	10.3927	6.63115e-23	2.59635e-22	40.9593
PTAR1	0.20463	-0.00107992	16.2742	1.59406e-47	2.7165e-46	97.255
LOC196541	-0.204552	-0.116055	-9.36106	3.30697e-19	1.09302e-18	32.5358
MAPK9	-0.20436	-0.100116	-17.8771	7.15233e-55	2.49712e-53	114.087
TBC1D7	-0.204332	-0.113363	-15.3416	2.47518e-43	3.0513e-42	87.6578
HOMER1	-0.204125	-0.0978723	-14.4068	3.25314e-39	3.06638e-38	78.2297
FCGR3B	0.204056	-0.0907148	10.9184	7.02618e-25	3.00399e-24	45.4638
MPST	0.204029	0.0077128	18.5258	6.95038e-58	3.44703e-56	120.989
RTN4	-0.203975	0.0783699	-16.2387	2.30756e-47	3.85098e-46	96.8871
MRPS30	-0.203901	-0.116368	-17.4539	6.44577e-53	1.83885e-51	109.609
CACNA2D3	-0.203892	-0.135925	-12.4056	9.35138e-31	5.40892e-30	58.8831
DOPEY2	-0.203805	-0.10783	-15.452	7.96928e-44	1.01811e-42	88.7847
DCC	-0.203727	-0.137627	-11.8383	1.81625e-28	9.32073e-28	53.6545
TUBB4	-0.203681	-0.101291	-14.3901	3.84706e-39	3.60688e-38	78.063
LOC647979	-0.203673	-0.101591	-16.1917	3.76834e-47	6.15082e-46	96.3993
STXBP5L	-0.203657	-0.0825201	-16.4212	3.43127e-48	6.16799e-47	98.7828
NME1	-0.20363	-0.0525486	-17.3767	1.4614e-52	4.00373e-51	108.794
EDG1	0.20361	0.0391208	13.3345	1.29838e-34	9.28058e-34	67.7027
DDX25	-0.203465	-0.0777913	-18.0026	1.87542e-55	7.01633e-54	115.419
AIF1	0.203303	-0.0420999	9.27333	6.64149e-19	2.16736e-18	31.8468
GLI2	0.203263	0.024721	15.0014	7.99865e-42	8.84562e-41	84.2021
ITGB8	0.203224	0.0124809	14.9433	1.44319e-41	1.56382e-40	83.6154
LPA	-0.203148	-0.0499565	-15.9333	5.52986e-46	8.29779e-45	93.7277
ANKRD19	-0.203105	-0.0896994	-15.0019	7.95748e-42	8.80513e-41	84.2073
LCA5	0.203102	0.0163939	21.1613	3.02986e-70	8.7468e-68	149.313
HIGD1B	0.202876	0.0538704	12.0957	1.6905e-29	9.1385e-29	56.0103
NCKAP1L	0.202856	-0.00870022	11.8552	1.55605e-28	8.01093e-28	53.8079
ESAM	0.20279	0.100181	13.9416	3.35933e-37	2.82137e-36	73.6211
ZNF652	0.20277	-0.092333	11.0785	1.71498e-25	7.54749e-25	46.8615
NPTXR	-0.20275	0.0996785	-12.4106	8.9214e-31	5.16794e-30	58.9298
IMPA2	0.202708	0.0359383	14.9022	2.191e-41	2.34523e-40	83.2003
NAPG	-0.202636	-0.16546	-10.5557	1.64247e-23	6.58827e-23	42.3414
YARS	-0.202606	-0.156103	-14.3068	8.86522e-39	8.14977e-38	77.2333
ARL9	-0.202545	-0.0817415	-16.9976	8.04981e-51	1.84697e-49	104.806
RAD18	-0.202453	-0.0651844	-14.8327	4.43631e-41	4.67359e-40	82.499
KCNF1	-0.20239	-0.0538028	-19.2271	3.69903e-61	2.81679e-59	128.491
RAMP1	0.202327	0.0441374	19.9005	2.57821e-64	2.77043e-62	135.725
STMN3	-0.202241	0.0566957	-16.1106	8.76735e-47	1.39801e-45	95.5595
LIPG	0.202065	-0.0371987	8.52785	2.07392e-16	6.0258e-16	26.1765
PACSIN1	-0.202016	-0.00810723	-17.6501	8.01499e-54	2.48042e-52	111.683
KCNQ1	0.20196	-0.0129338	13.684	4.26451e-36	3.3327e-35	71.0962
CXCL14	-0.201833	-0.0508595	-13.3675	9.41701e-35	6.78629e-34	68.0217
CACNB4	-0.201825	-0.108232	-13.5318	1.8965e-35	1.42289e-34	69.6136
EPS8	0.201792	-0.0344454	16.0652	1.40645e-46	2.19738e-45	95.0894
SLC15A3	0.201704	0.0286168	17.3239	2.55594e-52	6.8283e-51	108.238
C1orf115	-0.201679	-0.0520938	-18.4613	1.38798e-57	6.57996e-56	120.301
STC1	0.201656	-0.0391992	8.35126	7.69597e-16	2.18103e-15	24.8837
ID1	0.201626	0.00484565	11.4844	4.55162e-27	2.18401e-26	50.4594
SPON2	-0.20162	-0.0393268	-17.1137	2.36227e-51	5.78369e-50	106.026
KIF1C	0.201552	0.0562325	11.0515	2.17726e-25	9.55368e-25	46.6249
NGFR	0.201506	-0.031356	12.0889	1.79943e-29	9.71109e-29	55.9483
PARP14	0.201439	-0.00133767	14.3045	9.06457e-39	8.32907e-38	77.2112
FAM49B	-0.201426	-0.11602	-14.951	1.3352e-41	1.45168e-40	83.6927
PTPN13	0.201401	-0.0108533	18.2132	1.97745e-56	8.3877e-55	117.658
GPR22	-0.201304	-0.118977	-9.62829	3.84936e-20	1.32907e-19	34.6619
LRFN2	-0.201294	-0.0347892	-16.2784	1.52519e-47	2.60373e-46	97.299
GPNMB	0.20125	-0.0519788	10.2575	2.08989e-22	7.98866e-22	39.8228
C11orf31	-0.201222	-0.0122874	-22.8197	4.72377e-78	5.07595e-75	167.203
PPM1H	-0.20107	-0.154896	-15.9793	3.43256e-46	5.22365e-45	94.202
CACNA1G	-0.200784	-0.00396933	-12.7465	3.72043e-32	2.31459e-31	62.0839
C20orf141	0.200693	0.0363769	19.9531	1.46058e-64	1.64248e-62	136.29
TMEM65	-0.200621	-0.128359	-14.3933	3.72509e-39	3.49931e-38	78.095
C12orf29	-0.200538	-0.127311	-14.6315	3.39451e-40	3.38695e-39	80.4761
HABP4	-0.200366	-0.00380221	-18.6506	1.82312e-58	9.58227e-57	122.321
ATP6V0E1	0.200212	-0.00271929	19.0163	3.57974e-60	2.30798e-58	126.232
DRAM	0.200193	0.0232883	18.4882	1.04103e-57	5.03389e-56	120.587
GNAS	-0.20018	-0.14927	-13.9835	2.21675e-37	1.87561e-36	74.0342
CXCR7	0.20015	0.0587161	16.9807	9.6171e-51	2.1807e-49	104.629
SH3BP4	0.199961	-0.00701497	14.7996	6.20656e-41	6.47853e-40	82.1652
CCDC50	0.199761	0.0755437	17.028	5.83835e-51	1.35942e-49	105.126
ITGB5	0.199706	0.00973926	16.9951	8.2661e-51	1.8921e-49	104.78
P4HA2	0.199689	0.00545232	13.9806	2.28157e-37	1.92792e-36	74.0055
PPL	-0.199611	-0.0770233	-13.1385	8.66739e-34	5.93853e-33	65.8171
MAGEH1	-0.199544	-0.12804	-17.1575	1.48807e-51	3.69477e-50	106.486
TMPRSS3	0.19954	0.0113749	13.3069	1.6982e-34	1.20494e-33	67.436
GPRC5B	0.199459	-0.0252227	11.5734	2.0349e-27	9.9116e-27	51.2578
HTR2A	-0.199407	-0.0844457	-16.6534	3.01104e-49	5.96106e-48	101.203
CD68	0.199404	0.043508	11.0924	1.51609e-25	6.69502e-25	46.9837
LOC339524	-0.199358	-0.0638325	-18.0329	1.35772e-55	5.17969e-54	115.741
COPS8	-0.199325	-0.0939227	-18.2763	1.00646e-56	4.38447e-55	118.33
G3BP2	-0.199305	-0.0707893	-15.7452	3.88169e-45	5.46431e-44	91.7897
TMEM66	-0.199281	-0.11496	-14.0474	1.17679e-37	1.01162e-36	74.6634
SFRS12	0.19927	0.00201311	17.9899	2.14678e-55	7.98518e-54	115.285
STAT5A	0.199175	-0.0145247	18.4463	1.63099e-57	7.69432e-56	120.14
POLR2K	-0.199174	-0.0763446	-17.8514	9.40341e-55	3.21913e-53	113.815
KIAA1045	-0.199109	-0.0875061	-15.5978	1.7773e-44	2.39391e-43	90.2768
TES	0.199028	0.0159619	14.9183	1.86094e-41	2.00303e-40	83.3626
VCAN	0.199027	-0.0692334	10.3184	1.24779e-22	4.81925e-22	40.3334
GABRE	0.199013	0.00133683	14.3495	5.77679e-39	5.36928e-38	77.6589
GPR155	-0.198991	-0.123087	-13.2104	4.32571e-34	3.01072e-33	66.5074
FZD3	-0.198979	-0.172504	-9.28786	5.91873e-19	1.93575e-18	31.9606
ABHD4	0.198978	-0.00886344	17.8238	1.2622e-54	4.28306e-53	113.522
PNMA1	-0.198976	-0.0977202	-15.7878	2.49853e-45	3.56128e-44	92.2279
HPCAL4	-0.198931	-0.0524183	-16.6249	4.06201e-49	7.99261e-48	100.905
GAGE7B	0.198929	-0.000109894	11.0192	2.89595e-25	1.26213e-24	46.3422
C21orf9	0.198893	0.0167131	16.4485	2.57992e-48	4.69876e-47	99.0664
HIST1H3D	0.198857	-0.0282677	11.2673	3.19914e-26	1.46076e-25	48.526
CALCOCO2	0.198837	0.0133856	22.1827	4.6938e-75	2.83711e-72	160.335
HCRTR2	-0.198747	-0.0322525	-13.6537	5.74577e-36	4.45966e-35	70.8
CCDC113	-0.1987	-0.0912284	-18.781	4.49231e-59	2.51128e-57	123.715
ARC	-0.198523	-0.0258195	-10.6678	6.24391e-24	2.55651e-23	43.2994
SEZ6L	-0.198504	-0.0470104	-16.3469	7.46463e-48	1.30661e-46	98.0097
BEX4	-0.198472	-0.0356763	-19.0895	1.62739e-60	1.08917e-58	127.017
KIAA1107	-0.19845	-0.0587632	-13.1188	1.04885e-33	7.15585e-33	65.6277
CITED1	-0.198443	-0.0867185	-13.9947	1.98538e-37	1.68352e-36	74.1437
PBEF1	0.19844	-0.0148197	10.6407	7.89362e-24	3.21581e-23	43.0672
TNFAIP8	0.198389	-0.00306791	16.2562	1.92293e-47	3.24092e-46	97.0685
TMEM163	-0.19835	-0.0996421	-16.1401	6.45033e-47	1.03432e-45	95.8647
ASB2	-0.198275	-0.0549561	-15.3927	1.46508e-43	1.83533e-42	88.1792
ABHD7	-0.198259	-0.101989	-12.7343	4.17852e-32	2.59374e-31	61.9686
MAD2L1	-0.198237	-0.110479	-14.3565	5.38938e-39	5.0116e-38	77.7279
PPP2R2C	-0.198138	0.035021	-17.0387	5.21506e-51	1.22713e-49	105.238
C17orf51	-0.197921	-0.0769673	-16.0202	2.24425e-46	3.46711e-45	94.6246
MDP-1	-0.197912	-0.0904303	-18.6575	1.69327e-58	8.92406e-57	122.394
C5orf22	-0.197883	-0.108471	-15.6719	8.27303e-45	1.13487e-43	91.0372
TACSTD1	-0.197874	-0.104848	-7.82074	3.5084e-14	9.20503e-14	21.1221
ADARB2	0.19785	-0.0541137	7.99229	1.04081e-14	2.80186e-14	22.3181
PON2	0.197819	0.0187357	16.4358	2.94693e-48	5.34704e-47	98.9341
PPIC	0.197762	1.35957e-06	15.4906	5.35502e-44	6.93285e-43	89.18
EID1	-0.197608	-0.0702042	-16.2089	3.15115e-47	5.19604e-46	96.5772
PRKAR1A	-0.19758	-0.13884	-15.7214	4.96085e-45	6.90308e-44	91.5458
LOC126520	0.197538	0.0340836	13.1458	8.07857e-34	5.54099e-33	65.887
VAMP2	-0.197529	0.00817828	-11.3971	9.99788e-27	4.69595e-26	49.6791
ECGF1	0.197268	-0.0520668	10.8455	1.33105e-24	5.61509e-24	44.8307
SEMA3E	-0.197264	-0.150558	-10.502	2.60497e-23	1.03866e-22	41.8846
RTN3	-0.197251	0.0701202	-15.505	4.61967e-44	6.01708e-43	89.3269
CHL1	-0.197241	-0.0880184	-14.1503	4.22742e-38	3.73535e-37	75.6808
DYNC1LI1	-0.197233	-0.119238	-17.0035	7.56665e-51	1.73817e-49	104.868
ZNF804A	-0.197178	-0.0829407	-13.8004	1.35663e-36	1.09562e-35	72.2341
PLEKHF1	0.197157	0.00952227	18.4662	1.3175e-57	6.26118e-56	120.353
CECR6	-0.197033	-0.012453	-18.721	8.56113e-59	4.66449e-57	123.073
PARVG	0.196928	0.00286516	17.9593	2.97548e-55	1.08999e-53	114.96
RFK	-0.196658	-0.0753617	-16.2563	1.92157e-47	3.24092e-46	97.0692
C13orf1	-0.19661	-0.0367466	-18.1721	3.06607e-56	1.26718e-54	117.221
RAB7L1	0.196571	-0.0324241	19.0997	1.45933e-60	9.83499e-59	127.125
RNASEH2B	-0.196509	-0.0857175	-15.8606	1.17532e-45	1.7183e-44	92.9779
HAR1A	-0.196435	-0.115608	-15.2823	4.54578e-43	5.485e-42	87.0533
AP1G2	0.196327	0.0481411	15.7914	2.40623e-45	3.43225e-44	92.2653
NDUFC2	-0.196109	-0.0641336	-17.0331	5.53221e-51	1.29076e-49	105.179
TRABD	0.196079	0.0191611	21.1876	2.27824e-70	7.00771e-68	149.597
PAPLN	0.195991	0.0570635	10.8131	1.7659e-24	7.3931e-24	44.5506
DDA1	-0.195972	-0.0199449	-19.3054	1.59112e-61	1.27172e-59	129.33
PLOD2	0.195831	0.00130266	12.9077	7.98082e-33	5.15754e-32	63.6124
SLC22A6	0.195727	0.0253405	8.61717	1.06063e-16	3.12152e-16	26.8379
HLA-C	0.195708	0.0534898	13.0574	1.89519e-33	1.27679e-32	65.0401
KIAA1843	-0.195685	-0.117523	-13.0839	1.46768e-33	9.92932e-33	65.294
SEZ6	-0.195657	0.0495781	-14.8074	5.73148e-41	6.00858e-40	82.2443
SEH1L	-0.195632	-0.0672707	-19.6355	4.51543e-63	4.30925e-61	132.875
MMEL1	0.195606	0.0163589	20.4135	1.00156e-66	1.54978e-64	141.249
GDPD2	0.195586	0.0367258	10.4913	2.85532e-23	1.13731e-22	41.7937
PREP	-0.195463	-0.137527	-12.6105	1.35384e-31	8.19595e-31	60.8015
LOC728730	-0.195457	-0.132968	-16.6246	4.07372e-49	8.00751e-48	100.902
FGFR4	0.195355	0.0434741	14.0035	1.8191e-37	1.54795e-36	74.2306
CISD1	-0.195323	-0.0667361	-16.2068	3.22084e-47	5.30642e-46	96.5555
LOC158376	0.195196	0.0274576	11.9329	7.6131e-29	3.98303e-28	54.5171
PER2	-0.195164	-0.00158261	-14.3887	3.9034e-39	3.65615e-38	78.0485
ACRC	0.195133	-0.0594939	11.1824	6.81726e-26	3.05938e-25	47.7759
C1orf86	0.1951	0.0158363	14.8068	5.76862e-41	6.04096e-40	82.2379
SSFA2	0.194908	0.0538116	17.8056	1.53259e-54	5.1375e-53	113.329
CALB2	-0.194873	0.000791511	-9.63277	3.71158e-20	1.2831e-19	34.698
PPP1R1B	0.194872	0.140339	11.7274	5.01327e-28	2.50754e-27	52.6473
LGALS8	-0.194834	-0.138817	-12.9877	3.70362e-33	2.44489e-32	64.3748
PRIC285	0.194826	0.0827837	12.7141	5.06043e-32	3.13012e-31	61.7785
ELOVL4	-0.194769	-0.123599	-12.6154	1.29239e-31	7.83864e-31	60.8476
GALNT14	-0.19474	-0.0471541	-15.1116	2.60157e-42	2.97397e-41	85.3188
FAM149A	-0.194513	-0.0585352	-14.6061	4.38689e-40	4.34912e-39	80.2212
MEGF10	0.194459	-0.00350715	13.5621	1.41054e-35	1.06907e-34	69.9077
ZFHX3	0.19443	0.0179782	17.3351	2.27033e-52	6.11598e-51	108.356
KCNG3	-0.194238	-0.0471921	-17.3236	2.56498e-52	6.843e-51	108.235
BACE2	0.194111	0.00807534	15.7273	4.66905e-45	6.5252e-44	91.6061
XPO7	-0.194098	-0.107388	-11.8946	1.08299e-28	5.61739e-28	54.1674
GOLT1A	-0.194079	-0.0908284	-16.7653	9.29536e-50	1.94159e-48	102.372
GREM2	-0.19404	-0.104314	-12.001	4.06183e-29	2.15303e-28	55.1404
MECR	-0.193993	-0.0942644	-18.0772	8.45334e-56	3.29646e-54	116.212
FAM73A	-0.193925	-0.0219196	-13.5346	1.84489e-35	1.3874e-34	69.641
AP3B2	-0.193774	-0.0798018	-13.9305	3.75001e-37	3.13723e-36	73.5118
RUNDC1	-0.193712	-0.0393005	-19.048	2.54365e-60	1.66777e-58	126.572
KIAA1383	-0.193688	-0.00370273	-11.526	3.12648e-27	1.5103e-26	50.8319
STEAP4	0.193668	-0.00831908	10.0565	1.13072e-21	4.18811e-21	38.1517
CITED2	-0.19357	0.107665	-10.3729	7.84788e-23	3.06097e-22	40.7925
ANG	0.193494	0.0171616	16.5107	1.34549e-48	2.52176e-47	99.714
LOC643338	0.193485	0.00467888	12.3645	1.37581e-30	7.88941e-30	58.4998
RGS17	-0.193438	-0.127724	-12.3203	2.0823e-30	1.18146e-29	58.0885
GALNTL5	-0.193408	-0.10479	-10.7879	2.19993e-24	9.1626e-24	44.3329
SYNGR2	0.1934	-0.0169982	14.6536	2.71483e-40	2.73348e-39	80.6982
C13orf33	0.193298	-0.0679275	7.98191	1.12078e-14	3.01254e-14	22.2452
ACTR2	-0.193262	-0.10807	-14.2911	1.03671e-38	9.46743e-38	77.0777
HECW1	-0.193222	-0.125853	-13.5715	1.28658e-35	9.77799e-35	69.9991
PCOLCE	0.193151	0.0624548	12.5764	1.86816e-31	1.12392e-30	60.4818
RNF175	-0.193093	-0.0767321	-13.4944	2.73332e-35	2.03417e-34	69.2505
LOC284530	-0.19301	-0.0647324	-12.4079	9.15731e-31	5.29826e-30	58.9039
SEMA3F	0.193008	0.0300768	16.929	1.65982e-50	3.66486e-49	104.086
MEOX2	0.193003	0.0153925	9.95874	2.5523e-21	9.30042e-21	37.346
CLMN	0.192996	-0.0698666	12.3341	1.82976e-30	1.04307e-29	58.2168
SLC39A1	0.192989	0.0348897	16.4499	2.54232e-48	4.63902e-47	99.081
CIC	0.192966	0.0743296	16.3882	4.84583e-48	8.6068e-47	98.4394
CDC42SE2	-0.192881	-0.109902	-15.2923	4.10218e-43	4.96834e-42	87.1554
RHBDF1	0.192872	0.0288594	16.3847	5.02763e-48	8.91333e-47	98.4028
CALM3	-0.192843	-0.0337865	-13.877	6.36761e-37	5.24765e-36	72.9857
NDE1	0.192522	-0.0857527	10.3612	8.66823e-23	3.37278e-22	40.6941
CXCL16	0.192478	-0.00760683	14.7198	1.39189e-40	1.42218e-39	81.3623
KRT19	0.192317	0.0556333	10.8335	1.47796e-24	6.22395e-24	44.727
PPP1R14B	0.192252	0.0779957	17.1134	2.36974e-51	5.79462e-50	106.023
ZMAT4	-0.192147	-0.0745636	-14.1093	6.35746e-38	5.55151e-37	75.2753
KCNJ9	-0.192093	-0.135259	-12.4741	4.9076e-31	2.88257e-30	59.523
GRASP	-0.192087	0.0239744	-16.6869	2.11977e-49	4.26201e-48	101.552
GLT25D1	0.192071	0.0158209	20.1875	1.15723e-65	1.52266e-63	138.813
MAST3	-0.192018	-0.0553658	-19.344	1.04945e-61	8.63762e-60	129.745
COPS7A	-0.191997	-0.0467481	-19.1495	8.53477e-61	6.14236e-59	127.659
NDUFA4L2	0.191978	0.102897	10.2206	2.85224e-22	1.08513e-21	39.5149
OXR1	-0.191964	-0.106919	-15.3161	3.213e-43	3.92087e-42	87.3983
DPP6	-0.19195	-0.0693483	-18.3758	3.47018e-57	1.58677e-55	119.389
CEP68	-0.191913	-0.131932	-16.1988	3.49895e-47	5.73532e-46	96.4731
MGC20983	0.191843	0.0111609	18.2884	8.84185e-57	3.89565e-55	118.458
ALDH1A1	-0.191813	-0.0999992	-8.91793	1.07002e-17	3.30508e-17	29.1015
MAP3K6	0.191692	0.0438005	18.4437	1.67643e-57	7.88942e-56	120.113
PNMA2	-0.191666	-0.049801	-12.8953	8.98436e-33	5.78288e-32	63.4948
MOBP	-0.191648	-0.0904	-6.5276	1.74044e-10	3.85608e-10	12.7738
AKAP11	-0.191613	-0.138258	-13.5505	1.57959e-35	1.19252e-34	69.7953
ATP5G3	-0.191525	-0.0605014	-16.5872	6.03528e-49	1.16385e-47	100.511
GMNN	0.191445	-0.0388959	12.8876	9.67183e-33	6.21091e-32	63.4216
ATP6V1E1	-0.191398	-0.0133076	-18.2683	1.09602e-56	4.76386e-55	118.245
ARMCX5	-0.191366	-0.0865528	-14.8057	5.83585e-41	6.10476e-40	82.2264
GHITM	-0.191358	-0.034284	-12.4088	9.07707e-31	5.25498e-30	58.9126
FLJ33630	-0.191337	0.0240379	-15.8948	8.24628e-46	1.22692e-44	93.3303
PSMB8	0.191302	-0.0259442	15.3297	2.79495e-43	3.42369e-42	87.5369
ATF7IP2	-0.191269	-0.0803085	-19.7031	2.17761e-63	2.14894e-61	133.601
CHRDL2	-0.191259	-0.0698075	-13.9369	3.5202e-37	2.95391e-36	73.5746
MDH1B	-0.191206	-0.108257	-12.9436	5.65795e-33	3.69093e-32	63.954
KIAA0323	0.19118	0.0424961	20.4724	5.2924e-67	8.53047e-65	141.884
RDH12	-0.19113	-0.00227222	-18.5837	3.73737e-58	1.88251e-56	121.607
BRMS1L	-0.191098	-0.124056	-15.211	9.42463e-43	1.11357e-41	86.3283
DPY19L2	-0.191068	-0.0831657	-13.2105	4.32417e-34	3.01072e-33	66.5077
RHOBTB3	0.190778	-0.0275546	13.8694	6.85915e-37	5.63353e-36	72.9118
FAM46B	0.190758	0.0103112	11.7674	3.47984e-28	1.75599e-27	53.0095
GRRP1	0.190681	0.0722621	13.6135	8.52002e-36	6.53686e-35	70.4086
SSPN	0.190659	0.017266	14.2473	1.60586e-38	1.45007e-37	76.6428
RAB2A	-0.190657	-0.116553	-13.3163	1.54989e-34	1.10173e-33	67.5268
TUBB4Q	-0.190644	-0.054321	-15.8599	1.18345e-45	1.72888e-44	92.971
ZNF365	-0.190609	-0.10739	-13.0564	1.91257e-33	1.28806e-32	65.0311
GAGE7	0.19052	-0.000721769	10.4503	4.05716e-23	1.60346e-22	41.4458
C9orf125	-0.190432	-0.0968358	-13.2463	3.05516e-34	2.14338e-33	66.8527
P2RX7	0.190315	-0.0894383	10.3841	7.13671e-23	2.7897e-22	40.8866
SLAMF8	0.190254	-0.0249981	11.0741	1.78269e-25	7.84191e-25	46.8231
CD53	0.19024	-0.0687052	11.1763	7.19763e-26	3.22559e-25	47.7221
TMEM149	0.190058	-0.0381168	12.5037	3.71552e-31	2.19571e-30	59.7993
CDC42EP4	0.190001	0.0219452	16.0031	2.68168e-46	4.13299e-45	94.4475
C3orf28	-0.189841	-0.10215	-12.1796	7.75001e-30	4.27433e-29	56.7842
HSD17B1	0.189818	-0.00265735	15.3958	1.41884e-43	1.78087e-42	88.2111
BST2	0.189784	0.0160497	13.4824	3.0734e-35	2.27848e-34	69.134
PDPN	0.189688	-0.0730504	9.51445	9.66908e-20	3.27358e-19	33.7513
KIAA1804	-0.189634	-0.146271	-11.1196	1.1916e-25	5.29109e-25	47.2224
NNT	-0.189545	-0.117107	-12.8919	9.28186e-33	5.96841e-32	63.4624
SNED1	0.189434	0.088481	11.9656	5.62976e-29	2.96705e-28	54.8165
ADORA2A	0.189429	0.0403001	13.4501	4.21292e-35	3.09834e-34	68.8207
LHFPL5	-0.189397	-0.0301587	-15.2278	7.93369e-43	9.39127e-42	86.4996
DIO2	-0.189376	0.00193041	-8.99633	5.8326e-18	1.82399e-17	29.7006
EMILIN1	0.189314	0.0279384	15.7346	4.32791e-45	6.06158e-44	91.6815
DAGLA	-0.189281	0.100001	-15.9833	3.29247e-46	5.02231e-45	94.2434
HSPB2	0.189274	0.0461478	15.6586	9.48968e-45	1.29901e-43	90.9008
SCGB1D2	0.189228	-0.000313394	11.6413	1.09846e-27	5.41035e-27	51.8693
FZD9	0.189039	0.0817233	12.7781	2.75362e-32	1.72643e-31	62.3827
ENPP5	-0.189014	-0.0877495	-11.3363	1.72603e-26	7.98681e-26	49.1377
STAMBPL1	-0.188969	-0.0938141	-14.7363	1.17793e-40	1.20868e-39	81.5282
SCOC	-0.188957	-0.0231355	-20.2159	8.51092e-66	1.1353e-63	139.119
SMO	0.18893	0.0595821	18.7762	4.73051e-59	2.63681e-57	123.663
TDRD10	0.188915	0.0579028	13.5081	2.39205e-35	1.78431e-34	69.383
FOS	0.188652	-0.0443965	7.12663	3.91137e-12	9.39331e-12	16.4909
BTBD10	-0.188628	-0.0706645	-16.5896	5.88001e-49	1.13731e-47	100.537
INPP5F	-0.188525	-0.0449408	-14.7978	6.31821e-41	6.59152e-40	82.1475
RAD51C	-0.188453	-0.0557338	-14.9888	9.09114e-42	1.00137e-40	84.0748
hCG_1990170	-0.188416	-0.010437	-12.9016	8.45853e-33	5.45168e-32	63.5547
PROS1	0.188356	-0.0195594	14.4231	2.76312e-39	2.61469e-38	78.3919
NFIL3	0.1883	-0.0775507	11.0338	2.54409e-25	1.11053e-24	46.4706
TNFRSF6B	0.188288	0.0655417	12.9153	7.41509e-33	4.80156e-32	63.6854
ORAI1	0.188172	0.0514598	16.1186	8.06415e-47	1.288e-45	95.6426
BCL2L2	-0.18815	0.0338417	-22.3371	8.81112e-76	5.87671e-73	162
HS3ST2	-0.188141	-0.18124	-9.40614	2.30707e-19	7.67382e-19	32.8917
C10orf11	0.188132	0.0830343	9.82492	7.71321e-21	2.75409e-20	36.2519
RAP1GDS1	-0.18805	-0.131876	-13.9347	3.59656e-37	3.01409e-36	73.5533
MAGEE1	-0.187984	-0.0522132	-14.3041	9.10404e-39	8.36136e-38	77.2068
IDH3A	-0.187943	-0.126797	-12.0964	1.67902e-29	9.079e-29	56.017
DNAJC6	-0.187914	-0.109033	-15.6983	6.29897e-45	8.7087e-44	91.3083
SNAP23	0.187878	-0.00785566	18.603	3.03784e-58	1.55034e-56	121.813
FAM131A	-0.187838	0.0240495	-21.186	2.31876e-70	7.00771e-68	149.58
IGFBP5	0.187806	0.0614823	13.1139	1.09914e-33	7.49103e-33	65.5812
MYH9	0.187789	0.0467144	15.5272	3.67591e-44	4.8203e-43	89.5541
LOC256273	-0.187711	-0.0848398	-16.2418	2.23636e-47	3.73538e-46	96.9183
PHF10	0.187696	0.00687727	19.0702	2.00345e-60	1.32708e-58	126.81
RAB1A	-0.187616	-0.119655	-12.0445	2.7168e-29	1.44961e-28	55.5395
BIN2	0.187589	-0.0245612	11.6272	1.24957e-27	6.14057e-27	51.7414
RNF128	-0.18757	-0.0798764	-16.2803	1.49584e-47	2.55588e-46	97.3183
TMEM38A	-0.187553	-0.0331719	-17.4822	4.77026e-53	1.36894e-51	109.908
DFNB31	0.187511	0.0125909	11.5719	2.06323e-27	1.00445e-26	51.2441
SLITRK1	-0.187499	-0.0142244	-15.1285	2.18901e-42	2.51424e-41	85.4905
DYNLT3	-0.187443	-0.119146	-13.7657	1.90967e-36	1.52379e-35	71.8944
MOBKL2C	0.187411	0.0845605	19.9693	1.22625e-64	1.39519e-62	136.464
LOC152573	0.187383	-0.0149662	13.5111	2.32172e-35	1.73385e-34	69.4127
SH3BP2	0.187303	0.0150949	15.982	3.33927e-46	5.08969e-45	94.2294
STK38	0.187279	0.0521838	19.0012	4.21206e-60	2.66241e-58	126.07
C10orf75	0.187123	-0.0561589	14.62	3.81066e-40	3.79536e-39	80.3612
CLK1	0.18704	-0.0549358	12.7243	4.5946e-32	2.84745e-31	61.8743
GALR1	-0.187021	-0.0382427	-15.5071	4.52134e-44	5.89695e-43	89.3483
CD47	-0.186957	-0.114124	-15.037	5.5656e-42	6.22613e-41	84.5627
ITGA1	0.186948	0.0148718	12.167	8.70697e-30	4.78167e-29	56.6687
AUH	-0.186879	0.00141944	-15.4988	4.92383e-44	6.40462e-43	89.2635
HEPH	0.186836	0.0254754	14.3578	5.31732e-39	4.94936e-38	77.7413
NPFF	0.186836	0.0291383	15.1527	1.71062e-42	1.98006e-41	85.7356
TMEFF2	-0.186833	-0.0538826	-13.7798	1.66107e-36	1.33479e-35	72.033
CLEC2L	-0.186778	-0.00139025	-15.7047	5.89792e-45	8.17174e-44	91.3737
GIMAP2	0.186774	0.0533713	13.6252	7.60026e-36	5.86142e-35	70.5221
KCNT1	-0.186692	-0.0901127	-9.72398	1.76508e-20	6.19043e-20	35.433
LST1	0.186689	-0.0218724	12.5414	2.60267e-31	1.55469e-30	60.1526
CD48	0.186646	0.029843	10.2733	1.82802e-22	7.00566e-22	39.9553
FAIM2	-0.18658	-0.131109	-10.7766	2.42723e-24	1.00919e-23	44.2355
YES1	0.186578	-0.00763292	15.2351	7.36486e-43	8.73397e-42	86.5735
GPR137C	-0.186333	-0.163713	-11.4488	6.27844e-27	2.98519e-26	50.1405
LOC285556	-0.186311	-0.0636187	-13.9047	4.83867e-37	4.015e-36	73.2585
HSPC159	-0.186184	-0.0959197	-16.8556	3.59327e-50	7.75681e-49	103.318
USP54	0.186136	-0.00750127	12.5759	1.87756e-31	1.12922e-30	60.4768
BNIP3	-0.186075	-0.120791	-12.9113	7.71072e-33	4.98465e-32	63.6466
SNHG3	0.186055	-0.00284426	14.6958	1.77286e-40	1.80287e-39	81.1218
TP53INP1	0.186046	0.000983695	15.5001	4.86012e-44	6.326e-43	89.2764
RCN2	-0.186043	-0.114375	-15.3229	2.99835e-43	3.66818e-42	87.4671
HSPA2	0.185973	-0.0810016	8.12762	3.93706e-15	1.07954e-14	23.2754
GPT2	0.185876	0.0411793	14.4266	2.66689e-39	2.52982e-38	78.4272
DCN	0.185876	0.0156798	11.3071	2.24249e-26	1.03272e-25	48.8782
VPS4B	-0.185797	-0.099679	-11.2785	2.89492e-26	1.32654e-25	48.625
PLCH2	-0.185741	0.0293153	-16.0209	2.22825e-46	3.44515e-45	94.6317
SERPINB6	0.185715	0.0237062	19.4992	1.96814e-62	1.75428e-60	131.41
TMEM132B	-0.185683	-0.0655103	-16.8872	2.57651e-50	5.63106e-49	103.649
AXUD1	0.185675	0.000787706	15.0557	4.59798e-42	5.17059e-41	84.7526
F10	0.185536	0.0432874	12.0916	1.75602e-29	9.48476e-29	55.9725
TEAD4	0.185476	0.00530229	13.4353	4.86824e-35	3.55829e-34	68.6771
DOK6	-0.185367	-0.0846448	-14.5785	5.79459e-40	5.7154e-39	79.9445
MIR16	-0.185315	-0.165777	-12.6378	1.0445e-31	6.36505e-31	61.059
CDK5R1	-0.185282	-0.0899797	-11.5178	3.36694e-27	1.62443e-26	50.7584
RAB3IL1	0.185274	0.101817	14.1783	3.19806e-38	2.844e-37	75.9582
XK	-0.185226	-0.132334	-11.7659	3.52637e-28	1.77761e-27	52.9963
GPD1	-0.185205	-0.100995	-13.1288	9.51671e-34	6.50432e-33	65.7242
CYCS	-0.185202	-0.0379113	-19.5471	1.17349e-62	1.07572e-60	131.925
EIF4E	-0.185194	-0.0809283	-16.9533	1.28402e-50	2.88116e-49	104.342
KCNJ10	0.185184	-0.00642524	11.527	3.09992e-27	1.49784e-26	50.8403
TRIM38	0.185164	0.010969	15.9944	2.93355e-46	4.50324e-45	94.3582
SMOC1	0.185097	0.00811973	13.2987	1.83771e-34	1.30106e-33	67.3576
UNC13A	-0.185054	-0.00759487	-13.7623	1.97421e-36	1.57335e-35	71.8614
SAFB2	0.185011	0.0791411	18.9891	4.79752e-60	2.98372e-58	125.941
LARGE	-0.184984	-0.0710469	-17.2483	5.6945e-52	1.45692e-50	107.441
PTHR1	0.184966	0.0247738	11.8729	1.3225e-28	6.8322e-28	53.9692
KIRREL2	-0.184949	-0.035001	-18.1766	2.92248e-56	1.21563e-54	117.269
PHF21B	0.184907	0.0235637	13.5662	1.35485e-35	1.02807e-34	69.9477
C9orf72	-0.184869	-0.080352	-10.0576	1.12067e-21	4.15168e-21	38.1605
MGC4172	-0.184834	-0.000295137	-12.491	4.18741e-31	2.46629e-30	59.6806
FEN1	-0.184817	-0.125968	-14.7529	9.95832e-41	1.02727e-39	81.6952
RGR	0.18469	0.00738641	9.8983	4.21102e-21	1.52072e-20	36.8506
CDK2	0.184601	-0.00216606	17.4929	4.25921e-53	1.23142e-51	110.021
GSTA4	-0.184593	-0.0710032	-19.2281	3.6578e-61	2.79641e-59	128.502
NETO1	-0.184588	-0.0618959	-15.4141	1.17566e-43	1.48722e-42	88.398
DAB2	0.184551	0.00558423	12.1984	6.50103e-30	3.59677e-29	56.9586
PLOD3	0.184523	0.0170101	12.9138	7.52497e-33	4.86861e-32	63.6708
PTPLAD1	-0.184518	-0.109645	-12.5129	3.40652e-31	2.01967e-30	59.8854
TLR1	0.184474	-0.0645328	12.227	4.98166e-30	2.77601e-29	57.2228
NNAT	-0.184441	0.00483308	-11.1947	6.11084e-26	2.75002e-25	47.8844
SYN3	-0.184385	-0.0655691	-13.3319	1.33137e-34	9.50584e-34	67.6778
DTX4	-0.184373	-0.0383913	-20.0718	4.04413e-65	4.98227e-63	137.568
RUFY3	-0.184363	-0.126113	-11.2881	2.65634e-26	1.21838e-25	48.7103
COL24A1	-0.184356	-0.0861581	-12.4254	7.7655e-31	4.51866e-30	59.0675
DSTN	-0.184341	-0.0897326	-14.0467	1.18428e-37	1.01761e-36	74.6571
LOC283454	-0.184258	-0.0575865	-16.5663	7.50848e-49	1.43791e-47	100.294
ACTR10	-0.184247	-0.075033	-17.4102	1.02387e-52	2.86179e-51	109.148
C11orf41	-0.184208	-0.101566	-12.143	1.08884e-29	5.9526e-29	56.4468
CDC40	-0.184114	-0.110003	-13.0141	2.87491e-33	1.91483e-32	64.6263
ADFP	0.184114	-0.032049	16.4503	2.53124e-48	4.62316e-47	99.0854
TTC9	-0.184114	-0.0825354	-15.729	4.58505e-45	6.41244e-44	91.6241
YPEL1	-0.184048	-0.0738932	-15.4289	1.01042e-43	1.28407e-42	88.5486
SLC27A4	-0.183989	-0.0806767	-16.3341	8.53286e-48	1.48687e-46	97.8766
SMYD3	-0.183953	-0.0802071	-14.2402	1.72412e-38	1.55179e-37	76.5722
CDK2AP2	0.18395	0.047389	15.55	2.90728e-44	3.85683e-43	89.7874
TMEM119	0.183914	-0.0265773	12.2426	4.30748e-30	2.40726e-29	57.3671
ARHGAP29	0.183806	0.00326341	14.2656	1.3383e-38	1.213e-37	76.8239
AKAP5	-0.183709	-0.0627552	-12.1685	8.59133e-30	4.7195e-29	56.6819
GAGE8	0.183697	-0.00901858	11.4522	6.08929e-27	2.89739e-26	50.1708
TMEM14A	-0.183589	-0.0965391	-15.9364	5.35711e-46	8.04482e-45	93.7593
NDFIP2	-0.183568	-0.0556035	-14.1958	2.68657e-38	2.39464e-37	76.1314
TSKU	0.18347	0.080311	10.0182	1.55703e-21	5.73203e-21	37.8351
VDAC3	-0.183294	-0.125569	-12.9773	4.09525e-33	2.69331e-32	64.2749
RS1	-0.183287	-0.076349	-12.8148	1.93858e-32	1.22416e-31	62.7311
LHFPL2	0.183285	-0.0161992	19.4062	5.36624e-62	4.51277e-60	130.412
CYP2J2	0.183271	-0.0342253	12.3473	1.61677e-30	9.23557e-30	58.3396
EPHA4	-0.183251	-0.111809	-12.3258	1.97828e-30	1.12475e-29	58.1393
PER1	0.183241	0.109696	15.3964	1.4104e-43	1.77258e-42	88.217
ARHGDIB	0.18322	0.0059424	11.7034	6.24304e-28	3.10898e-27	52.4297
DMRTC1	-0.183094	-0.0535661	-14.7018	1.66983e-40	1.70078e-39	81.1813
UNG	0.182993	-0.00197196	16.9374	1.51842e-50	3.37966e-49	104.175
PAP2D	-0.182983	-0.0369489	-17.6386	9.05897e-54	2.78567e-52	111.561
RAPGEF3	0.182981	0.0682901	13.327	1.39609e-34	9.94593e-34	67.6306
ZBTB1	0.182968	0.0357531	15.769	3.03216e-45	4.29656e-44	92.0354
MORF4L2	-0.182959	-0.101842	-13.2828	2.14511e-34	1.51426e-33	67.204
P4HA1	0.18289	0.00206228	13.3771	8.58233e-35	6.19401e-34	68.1139
MCPH1	0.182842	-0.01998	16.2945	1.28987e-47	2.22161e-46	97.4656
F3	0.182671	-0.103008	7.27335	1.48457e-12	3.62923e-12	17.4415
TCEB1	-0.18263	-0.0527635	-21.2871	7.74942e-71	2.49815e-68	150.67
HBP1	0.18262	-0.00290515	17.5862	1.58209e-53	4.75905e-52	111.006
PGAM5	-0.182576	-0.0432629	-20.2768	4.40105e-66	5.99472e-64	139.776
ASPHD1	-0.182513	0.00608455	-19.3378	1.12146e-61	9.19125e-60	129.679
IFI16	0.182496	0.140366	12.3216	2.0574e-30	1.16801e-29	58.1004
PLEKHC1	0.182447	0.0449898	15.0918	3.18369e-42	3.62016e-41	85.118
GRIN2A	-0.182402	-0.102068	-12.5675	2.03307e-31	1.2201e-30	60.3978
PAX6	0.182301	0.00785758	13.5976	9.96297e-36	7.61374e-35	70.2531
APBB1IP	0.182177	0.00559019	9.40931	2.24938e-19	7.48837e-19	32.9167
C16orf80	-0.182142	-0.101426	-16.5393	9.9715e-49	1.89087e-47	100.012
CTDSP2	0.18214	0.0669727	16.4155	3.64231e-48	6.53521e-47	98.7234
LOXL2	0.182137	0.0281267	14.1252	5.42535e-38	4.76121e-37	75.4329
EEF1D	0.182135	0.0976516	17.3051	3.12136e-52	8.27033e-51	108.039
SNAPC5	-0.182118	-0.13076	-16.6073	4.88768e-49	9.52039e-48	100.721
CLTA	-0.182059	-0.0619577	-17.2038	9.12016e-52	2.2969e-50	106.973
SFRP2	0.182018	0.0198443	7.71969	7.1122e-14	1.83836e-13	20.427
GRM1	-0.181915	-0.139703	-9.94666	2.82146e-21	1.0258e-20	37.2468
MFNG	0.181893	-0.00254357	16.2662	1.73346e-47	2.93852e-46	97.1717
DLGAP2	-0.181822	0.0509817	-12.2191	5.36172e-30	2.97921e-29	57.1498
MPPED1	-0.181803	-0.0421352	-15.9556	4.39089e-46	6.64023e-45	93.9571
ATP1A3	-0.181746	-0.0058893	-14.4725	1.68317e-39	1.61808e-38	78.8846
CCRK	-0.181656	-0.0241323	-16.589	5.92293e-49	1.14333e-47	100.53
EIF4EBP1	0.181653	-0.031041	13.767	1.88472e-36	1.50451e-35	71.9075
FLJ21438	0.181641	-0.0265356	14.9996	8.14497e-42	9.00229e-41	84.1841
AMIGO2	-0.181561	-0.0360688	-13.6616	5.31241e-36	4.13159e-35	70.8779
TMEM14B	-0.181528	-0.0687638	-19.0083	3.90118e-60	2.49032e-58	126.147
TSPYL4	-0.181527	-0.0238222	-15.8909	8.58296e-46	1.27212e-44	93.2905
PPP2R2B	-0.18152	-0.0398812	-20.8632	7.6738e-69	1.76698e-66	146.097
FAM111A	0.181491	0.00922662	15.8384	1.47964e-45	2.14376e-44	92.7489
FXYD3	0.181466	0.0236922	16.4816	1.82366e-48	3.3819e-47	99.4115
FLT1	0.181466	-0.00794805	10.8804	9.80405e-25	4.16038e-24	45.1337
hCG_2045614	-0.181426	-0.010847	-18.621	2.50413e-58	1.28474e-56	122.005
NXPH2	-0.181416	-0.0480668	-15.6015	1.71064e-44	2.30894e-43	90.3148
ADCY2	-0.181395	-0.0538022	-17.6755	6.11653e-54	1.91433e-52	111.952
COPZ2	0.181362	0.0645923	13.7508	2.21123e-36	1.75645e-35	71.7487
CDS1	-0.181326	-0.066648	-12.9348	6.15241e-33	4.00673e-32	63.8708
ARPC5L	-0.181245	-0.045012	-20.7972	1.56839e-68	3.3336e-66	145.385
MYSM1	-0.181221	0.0954495	-15.4696	6.64861e-44	8.539e-43	88.9648
MRPS23	-0.181167	-0.0714762	-17.3114	2.91766e-52	7.75183e-51	108.107
LIG4	-0.181153	-0.0851774	-12.0461	2.67696e-29	1.42953e-28	55.5541
DLAT	-0.181129	-0.0527128	-17.5726	1.82706e-53	5.47042e-52	110.863
GPRC5C	0.181118	0.039473	13.6301	7.24272e-36	5.59459e-35	70.5699
ADORA2B	0.1811	0.0171428	11.7311	4.84929e-28	2.42678e-27	52.6803
YAP1	0.181029	0.00384088	18.7701	5.05396e-59	2.80902e-57	123.598
KRAS	-0.181001	-0.123289	-11.4015	9.61292e-27	4.51952e-26	49.7181
JPH1	-0.180896	-0.104192	-11.858	1.51651e-28	7.81153e-28	53.8334
C1orf74	-0.180658	-0.0569722	-15.9379	5.27591e-46	7.92904e-45	93.7745
GMPR	0.180599	0.0244655	20.2869	3.94594e-66	5.41294e-64	139.884
GNAL	-0.180588	-0.0709556	-14.8012	6.10791e-41	6.38245e-40	82.1811
KDR	0.180475	0.0503553	8.73671	4.29021e-17	1.28933e-16	27.7309
FGF9	-0.180466	-0.0571219	-13.5214	2.09986e-35	1.57059e-34	69.5124
LEAP2	0.180438	-0.0254633	16.4412	2.78392e-48	5.05601e-47	98.9907
MYO5A	-0.180367	-0.0754787	-15.9937	2.95532e-46	4.53306e-45	94.3509
GUF1	-0.180274	-0.109999	-13.8275	1.03834e-36	8.43847e-36	72.4998
ATP6V0E2	-0.180207	0.0885773	-14.3009	9.3988e-39	8.60348e-38	77.1752
HHEX	0.180147	0.00465217	14.6392	3.13977e-40	3.14172e-39	80.5537
PIN1	-0.180055	-0.03793	-17.5238	3.06931e-53	8.98132e-52	110.347
GLRA2	-0.18005	-0.0626969	-11.1403	9.91661e-26	4.42054e-25	47.4044
RNF11	-0.180034	-0.0601287	-19.2259	3.74769e-61	2.84266e-59	128.478
GPR146	0.179947	0.0226039	17.0601	4.16177e-51	9.87692e-50	105.462
C3orf59	-0.179944	-0.0902922	-14.0474	1.17647e-37	1.01162e-36	74.6637
STXBP5	-0.179921	-0.0954307	-14.632	3.37671e-40	3.37183e-39	80.4813
PTPN7	0.179848	-0.0179292	11.4951	4.13549e-27	1.98798e-26	50.5545
HAVCR2	0.179845	-0.03239	12.833	1.63036e-32	1.03222e-31	62.9031
NTN4	-0.179783	-0.0674121	-15.6079	1.60123e-44	2.16429e-43	90.3805
ASAH2	-0.179761	-0.0902046	-10.654	7.03778e-24	2.87729e-23	43.1808
CGNL1	0.179685	0.0400567	13.7872	1.54515e-36	1.24268e-35	72.1048
OAT	-0.179627	-0.0934545	-15.5496	2.9192e-44	3.86999e-43	89.7833
CX3CL1	-0.17962	-0.0288114	-16.2441	2.18311e-47	3.65102e-46	96.9423
CNTNAP5	-0.179615	-0.114715	-12.6327	1.09692e-31	6.67188e-31	61.0104
INA	-0.179574	-0.0395479	-12.5274	2.96823e-31	1.76923e-30	60.0222
CSPG4	0.179566	0.0651846	12.2602	3.65151e-30	2.04658e-29	57.531
ATP5L	-0.179543	-0.0410983	-18.968	6.01978e-60	3.71996e-58	125.715
TGFB2	0.179539	-0.0137563	12.6836	6.76627e-32	4.15075e-31	61.4901
DYNLT1	0.179501	0.00768873	17.9318	3.99243e-55	1.45154e-53	114.667
SEPT8	0.179452	-0.0145682	15.2638	5.48909e-43	6.58214e-42	86.8658
LOC116236	0.179442	0.0156592	18.3051	7.39815e-57	3.30474e-55	118.636
SSTR1	-0.179421	-0.0935018	-19.4863	2.26051e-62	2.00563e-60	131.272
OSBPL10	-0.179366	-0.0757832	-17.2193	7.73494e-52	1.9608e-50	107.137
PARD3	0.179352	0.025388	18.6755	1.39479e-58	7.45247e-57	122.587
RAPGEF4	-0.179325	-0.0800503	-11.1382	1.00967e-25	4.49876e-25	47.3866
GIMAP6	0.179315	0.0146234	12.5454	2.50486e-31	1.49858e-30	60.1907
LHX6	-0.179262	-0.0363731	-16.194	3.67734e-47	6.01243e-46	96.4236
KLK14	0.179261	0.0734783	12.6525	9.09186e-32	5.55273e-31	61.1967
EML3	0.179229	0.0492934	14.9816	9.78361e-42	1.07459e-40	84.0019
ABCC12	-0.179184	0.00472117	-15.1047	2.79222e-42	3.18439e-41	85.2485
RELN	-0.179114	-0.134084	-8.52938	2.05028e-16	5.95891e-16	26.1878
ZAK	0.179046	0.0103934	17.7558	2.60304e-54	8.50474e-53	112.802
ZMIZ2	-0.178965	-0.00776809	-16.523	1.18197e-48	2.22606e-47	99.8429
PID1	-0.178929	-0.115021	-14.1015	6.87264e-38	5.98517e-37	75.1979
C6orf115	-0.178854	-0.0715071	-17.4101	1.02534e-52	2.86179e-51	109.147
TCF7L1	0.178843	0.0687679	14.1116	6.21476e-38	5.43427e-37	75.2979
PFKFB3	0.178789	-0.00464135	14.3207	7.7113e-39	7.10247e-38	77.3719
MYO5B	-0.178671	-0.0403023	-14.3027	9.2353e-39	8.45838e-38	77.1926
PTPRN	-0.178643	0.0884491	-10.5745	1.39721e-23	5.62902e-23	42.5016
TP53BP2	0.178591	0.0280574	12.6381	1.04163e-31	6.34955e-31	61.0617
CFLAR	0.178457	-0.00962458	16.4724	2.00932e-48	3.70136e-47	99.3151
CENTD2	0.17839	-0.00598563	18.0977	6.79449e-56	2.6875e-54	116.429
NEXN	0.178325	0.0132912	12.8942	9.07952e-33	5.84218e-32	63.4843
LRRC4	-0.178292	-0.068313	-11.0548	2.11409e-25	9.27858e-25	46.6541
ABCA8	0.178223	-0.116352	7.53328	2.57227e-13	6.49855e-13	19.1632
BAI3	-0.178214	-0.089686	-14.3917	3.78551e-39	3.55261e-38	78.079
RASAL1	-0.178167	-0.0833162	-15.2087	9.6524e-43	1.13979e-41	86.3046
NRIP2	0.178161	-0.0270226	12.3264	1.96654e-30	1.11873e-29	58.1453
CACNG1	-0.177808	-0.0441176	-18.2102	2.04187e-56	8.60431e-55	117.626
CHM	-0.177802	-0.100151	-10.9885	3.79584e-25	1.64617e-24	46.074
KIAA0774	-0.177723	-0.0802017	-10.9592	4.90916e-25	2.11713e-24	45.8191
LOC130576	-0.177717	-0.0307528	-13.0137	2.88481e-33	1.92076e-32	64.6229
ENG	0.177617	0.0187448	12.7585	3.31637e-32	2.06987e-31	62.198
VTA1	-0.177614	-0.0251417	-16.5331	1.06334e-48	2.01047e-47	99.9481
WDR6	0.177562	0.0454256	18.0972	6.83156e-56	2.69116e-54	116.424
CLEC4G	-0.177449	-0.0878268	-13.6168	8.24924e-36	6.33917e-35	70.4407
S100A6	0.177355	0.0470278	14.8236	4.86333e-41	5.11787e-40	82.4076
FNDC4	-0.177345	-0.0232779	-17.5983	1.39133e-53	4.21145e-52	111.134
RAP2A	-0.17725	-0.126505	-8.99782	5.76569e-18	1.80365e-17	29.712
HSPB8	0.177198	-0.0240139	15.1959	1.09964e-42	1.29139e-41	86.175
TRIM21	0.177151	0.0442538	17.0384	5.23321e-51	1.2299e-49	105.234
CA14	-0.1771	-0.122787	-8.19727	2.37609e-15	6.58806e-15	23.7728
CARD9	0.177082	-0.00728176	15.1566	1.64374e-42	1.90378e-41	85.7753
KCNJ2	0.177075	-0.0297731	10.6534	7.07137e-24	2.89042e-23	43.1761
UNC93B1	0.176938	0.0548961	16.0988	9.91123e-47	1.57005e-45	95.4375
PREX1	0.176936	-0.0458183	11.3733	1.23766e-26	5.78652e-26	49.4675
SOAT1	0.17691	0.000554241	18.0263	1.4558e-55	5.53206e-54	115.671
SMAD9	0.176837	0.0345115	10.0651	1.05244e-21	3.90642e-21	38.2227
NINJ1	0.176648	0.0168098	18.1033	6.40143e-56	2.54243e-54	116.489
HDAC7A	0.176625	0.0363731	17.2765	4.22572e-52	1.10448e-50	107.738
ATP5C1	-0.176594	-0.0513171	-18.9345	8.63071e-60	5.21673e-58	125.356
SLC25A3	-0.176513	-0.0214106	-18.9356	8.53018e-60	5.17212e-58	125.368
FBXO30	0.176478	-0.0272112	13.7465	2.30675e-36	1.83083e-35	71.7067
GALM	0.176452	0.0279326	16.699	1.8657e-49	3.76359e-48	101.679
FAM49A	-0.176391	-0.0712708	-19.7426	1.42146e-63	1.43197e-61	134.026
MBP	-0.17635	-0.0619355	-9.24454	8.34108e-19	2.71057e-18	31.6216
RNF130	0.176346	-0.00206415	12.6667	7.94264e-32	4.85546e-31	61.3309
CASC3	0.17633	0.0364904	18.6919	1.16953e-58	6.28365e-57	122.763
TSPYL5	-0.176304	-0.0711455	-17.7533	2.67388e-54	8.70676e-53	112.775
HIST2H2AA3	0.176278	-0.0586952	8.19284	2.45396e-15	6.79714e-15	23.741
RARRES2	0.176261	0.0432004	14.1224	5.57834e-38	4.89326e-37	75.4053
MCTS1	-0.176048	-0.073587	-15.6407	1.14132e-44	1.55351e-43	90.7172
TUBA3C	-0.176024	-0.0276011	-15.0753	3.76579e-42	4.26202e-41	84.9511
C5orf29	0.17601	0.0213702	11.2131	5.18873e-26	2.34377e-25	48.0465
PRSS23	0.175984	-0.0262719	12.7756	2.8191e-32	1.76634e-31	62.3593
NDUFA9	-0.175971	-0.0845904	-16.5759	6.79308e-49	1.30349e-47	100.394
PSCDBP	0.175968	0.0143157	12.7	5.79037e-32	3.56566e-31	61.6447
IGFBP4	0.17595	0.0949156	7.69153	8.64955e-14	2.22858e-13	20.2346
TMEM85	-0.175864	-0.123289	-16.105	9.29641e-47	1.47871e-45	95.5012
MAP3K9	-0.17585	-0.0908079	-14.4988	1.29228e-39	1.24851e-38	79.1473
IMPAD1	-0.175813	-0.139246	-11.0617	1.98918e-25	8.74028e-25	46.7145
LAMP2	0.175579	-0.0783581	11.7383	4.53721e-28	2.27531e-27	52.7463
TECTA	-0.175578	-0.0486105	-17.3	3.29275e-52	8.68873e-51	107.986
CNTN5	-0.175554	-0.10075	-12.3213	2.06284e-30	1.17076e-29	58.0978
RND1	-0.17555	-0.0467139	-15.1906	1.16146e-42	1.35986e-41	86.1206
MRPL15	-0.175492	-0.0683303	-17.0619	4.08285e-51	9.70154e-50	105.481
PANK3	-0.175485	-0.0918551	-17.7196	3.82817e-54	1.2259e-52	112.418
AGTR1	0.175479	0.00634621	11.9611	5.86934e-29	3.08995e-28	54.7752
ACOX2	0.175429	0.0236666	14.3647	4.96199e-39	4.63199e-38	77.81
JAZF1	-0.175294	-0.0326691	-17.8664	8.01293e-55	2.76268e-53	113.974
ALDH1A3	-0.17528	-0.0487701	-13.718	3.05337e-36	2.41054e-35	71.4281
PLXNB3	0.17527	0.0664342	8.18915	2.5206e-15	6.97574e-15	23.7147
BTK	0.175267	-0.04711	11.4323	7.28185e-27	3.44872e-26	49.9935
BATF	0.175264	-0.0250047	12.7773	2.77351e-32	1.73834e-31	62.3755
FBLN1	0.175256	0.0312701	17.5967	1.41506e-53	4.27657e-52	111.117
SPAG6	-0.175235	-0.122699	-10.9028	8.05727e-25	3.43344e-24	45.3281
MTA2	0.175195	0.138067	9.96682	2.38668e-21	8.7084e-21	37.4124
MPPED2	-0.175191	-0.0518525	-19.1233	1.13111e-60	7.86979e-59	127.379
MGAT1	0.175188	0.0498923	16.2457	2.14555e-47	3.59924e-46	96.9595
GNG11	0.174972	0.0840649	11.7854	2.95139e-28	1.49596e-27	53.1729
ITGA6	0.174946	0.0269415	14.0494	1.15265e-37	9.92192e-37	74.684
CAMK2N1	-0.174846	0.0569762	-13.285	2.09915e-34	1.48236e-33	67.2255
SGEF	0.174816	0.00946595	12.5933	1.59245e-31	9.61033e-31	60.6403
TPPP	-0.174692	-0.0900443	-12.5611	2.15885e-31	1.29478e-30	60.3382
LGALS3	0.174669	0.0113887	13.0443	2.14871e-33	1.44057e-32	64.9154
tcag7.1015	-0.174642	0.0616438	-18.3868	3.08259e-57	1.41288e-55	119.507
ZDHHC23	-0.174613	-0.0416495	-15.7406	4.06749e-45	5.71741e-44	91.7432
SYP	-0.174566	0.0300361	-12.2217	5.23456e-30	2.91106e-29	57.1736
ACSL1	0.174544	-0.0911197	12.0805	1.94516e-29	1.0483e-28	55.871
TRIM67	-0.174526	-0.0200049	-17.092	2.97269e-51	7.17825e-50	105.797
SP110	0.174513	-0.0254376	13.9333	3.64812e-37	3.05463e-36	73.5391
MYCBP2	-0.174509	-0.0602544	-14.4268	2.6619e-39	2.52633e-38	78.429
RAB27A	0.174459	-0.00156881	15.8488	1.32798e-45	1.93272e-44	92.8565
CLIC4	0.17442	-0.0509138	10.3125	1.31142e-22	5.05895e-22	40.2841
NMI	0.174412	-0.0283215	13.0297	2.47391e-33	1.654e-32	64.7755
FLNA	0.174399	0.0595879	10.9664	4.61114e-25	1.99082e-24	45.8812
CMTM7	0.174398	0.0223831	16.0799	1.20689e-46	1.8994e-45	95.2416
TRPS1	0.174266	-0.0137054	12.9187	7.18288e-33	4.65432e-32	63.717
GAGE4	0.174215	0.000700745	10.2968	1.49809e-22	5.76409e-22	40.1524
GTF2H3	-0.174204	-0.119999	-14.2741	1.22848e-38	1.11608e-37	76.909
C6orf190	-0.174131	-0.109447	-8.82421	2.19955e-17	6.69768e-17	28.3902
LRRC37A2	0.174117	0.047341	9.30222	5.28137e-19	1.72934e-18	32.0732
LOC399818	-0.174094	-0.0383854	-16.8757	2.90866e-50	6.33284e-49	103.528
LYN	0.174091	-0.0189921	13.3106	1.63826e-34	1.16326e-33	67.4717
MICAL2	-0.174091	-0.0694809	-13.2351	3.4076e-34	2.38372e-33	66.7443
ATP5H	-0.174045	-0.0756964	-17.797	1.679e-54	5.60885e-53	113.238
NPY2R	-0.174042	-0.0616497	-6.91655	1.52482e-11	3.5667e-11	15.157
AMPH	-0.174033	-0.0775229	-10.8789	9.93746e-25	4.21606e-24	45.1203
TMEM133	0.174027	0.0938189	15.8735	1.02814e-45	1.51341e-44	93.111
PRDX6	0.173998	0.0737683	12.9182	7.21357e-33	4.67264e-32	63.7128
MYH11	0.173934	-0.00980033	4.44729	1.08729e-05	1.83924e-05	2.07391
NLE1	-0.1739	-0.0529065	-16.956	1.24792e-50	2.8034e-49	104.37
CASQ1	-0.173872	-0.0342998	-10.553	1.68177e-23	6.74453e-23	42.318
BTG2	0.173872	0.0687756	10.3352	1.08169e-22	4.18774e-22	40.4748
ARHGEF6	0.173844	0.0172168	21.6682	1.2424e-72	4.90418e-70	154.784
NPFFR2	-0.173834	-0.0792805	-9.59056	5.22764e-20	1.79342e-19	34.3593
FLJ43315	-0.173813	-0.0687307	-13.4049	6.54294e-35	4.75586e-34	68.3834
SLC16A3	0.173768	0.0583709	10.6177	9.63103e-24	3.90859e-23	42.8701
PTP4A1	-0.173711	-0.110056	-15.7857	2.55326e-45	3.63393e-44	92.2063
CLU	0.173711	0.20501	14.2813	1.14374e-38	1.04203e-37	76.9801
CACNB3	-0.173708	-0.0798828	-13.3277	1.3871e-34	9.88913e-34	67.637
LTBP3	0.173672	0.060747	19.5592	1.02985e-62	9.57663e-61	132.055
LOR	-0.173671	-0.021137	-16.1677	4.83734e-47	7.82307e-46	96.1509
TMSL3	-0.173631	0.136484	-10.4803	3.13647e-23	1.24672e-22	41.7007
PDHX	-0.173623	-0.111578	-15.4109	1.21469e-43	1.53459e-42	88.3656
IGF2BP2	0.173618	0.03589	14.3756	4.44821e-39	4.1584e-38	77.9187
PPAP2B	0.173609	0.0647508	10.1441	5.43129e-22	2.04381e-21	38.8774
PPP1R14C	-0.173586	-0.0853227	-17.6848	5.54221e-54	1.74589e-52	112.05
C15orf37	-0.173574	-0.0557701	-18.4131	2.32586e-57	1.07624e-55	119.787
NUDT18	-0.173565	-0.0774181	-12.7814	2.66766e-32	1.67308e-31	62.4142
ZNRF3	0.173564	0.0507319	11.832	1.92529e-28	9.86983e-28	53.5967
ELF4	0.173559	0.0137686	15.5515	2.86176e-44	3.79904e-43	89.8031
KIF7	0.173479	0.0383	17.8225	1.27955e-54	4.33434e-53	113.508
LOC387804	-0.173422	-0.0701586	-11.0938	1.49774e-25	6.61851e-25	46.9957
ABCC4	0.173417	-0.0408263	14.1275	5.30614e-38	4.66294e-37	75.455
LANCL2	-0.173366	-0.0520275	-22.3232	1.02362e-75	6.59962e-73	161.851
LMBR1	-0.173364	-0.0755308	-16.3897	4.77206e-48	8.49137e-47	98.4547
OR5BU1	-0.173354	-0.0455408	-11.5661	2.17411e-27	1.05737e-26	51.1922
HSD17B7	0.173295	-0.0522121	13.0133	2.89676e-33	1.92738e-32	64.6188
UBE2E3	-0.173292	-0.0549824	-18.4869	1.05474e-57	5.08747e-56	120.574
MYL5	-0.173284	-0.0412968	-11.5846	1.83976e-27	8.97923e-27	51.3578
TBC1D2B	0.173247	0.0440803	23.9269	3.00099e-83	7.25565e-80	179.111
STXBP4	0.173237	0.0346079	18.6451	1.93326e-58	1.01063e-56	122.263
SLC25A5	-0.173096	-8.3972e-05	-19.7298	1.63177e-63	1.62689e-61	133.888
SERPINE1	0.173081	-0.0438995	9.83213	7.26862e-21	2.59726e-20	36.3106
LOC729681	-0.173034	-0.0371682	-10.4035	6.04926e-23	2.37332e-22	41.0503
MGC13379	0.173011	0.0279343	18.8001	3.66048e-59	2.08853e-57	123.919
HCG18	-0.172947	-0.0544918	-14.5609	6.91673e-40	6.77727e-39	79.7686
ATP5F1	-0.172903	-0.124623	-13.418	5.76167e-35	4.19745e-34	68.5098
GAGE3	0.172872	0.0151154	10.1373	5.7507e-22	2.16107e-21	38.8208
RSAD2	-0.172827	-0.12676	-7.97391	1.18664e-14	3.18601e-14	22.189
ITGAM	0.172684	-0.033106	12.7152	5.01032e-32	3.10111e-31	61.7884
WAS	0.172606	0.0738994	12.6183	1.25729e-31	7.63051e-31	60.8749
HRBL	0.17253	0.0524773	19.9201	2.08632e-64	2.26706e-62	135.935
MCAT	-0.172493	-0.0747376	-16.9487	1.34788e-50	3.01048e-49	104.293
IRAK3	0.172469	0.0171412	14.4295	2.59021e-39	2.45949e-38	78.4562
GPR98	0.172427	0.0505116	10.9359	6.02719e-25	2.5843e-24	45.6158
ANLN	0.172419	-0.202345	5.55959	4.54861e-08	8.89667e-08	7.35164
KLF10	-0.172419	-0.064105	-11.556	2.38225e-27	1.15686e-26	51.1015
FSTL5	-0.172357	-0.0833609	-12.0462	2.67275e-29	1.42768e-28	55.5557
MAGI1	-0.17234	-0.094361	-16.3477	7.40136e-48	1.29671e-46	98.0181
COL21A1	0.172288	-0.00373113	12.2389	4.45539e-30	2.48777e-29	57.3336
NPM2	-0.172247	-0.0852378	-13.9103	4.57712e-37	3.80941e-36	73.3137
TMEM123	0.172242	0.0181555	12.9558	5.03306e-33	3.29105e-32	64.0702
CLECL1	0.17214	-0.0363835	8.42198	4.5626e-16	1.30412e-15	25.3991
RHOQ	0.172128	-0.000383853	19.5063	1.8216e-62	1.63876e-60	131.487
SRrp35	-0.172127	-0.112455	-15.1483	1.78848e-42	2.06648e-41	85.6914
MAPRE1	0.172044	0.012445	18.4468	1.62177e-57	7.66951e-56	120.146
SCGN	0.171976	-0.0154316	10.6415	7.83727e-24	3.19537e-23	43.0743
GULP1	-0.171971	-0.0593264	-14.3449	6.04881e-39	5.61671e-38	77.6132
LOC202134	-0.171932	-0.0747099	-12.181	7.6486e-30	4.2196e-29	56.7973
LHFPL4	-0.171888	-0.0981434	-14.2295	1.91896e-38	1.72154e-37	76.4658
LOC388279	0.171796	0.00450022	13.7945	1.43749e-36	1.15898e-35	72.1766
AK5	-0.171795	-0.0803195	-11.1232	1.1534e-25	5.125e-25	47.2547
DGCR9	-0.171731	-0.047036	-14.6477	2.8828e-40	2.89357e-39	80.6385
RGL2	0.171665	0.0349571	18.0789	8.30251e-56	3.24419e-54	116.23
FGL2	0.171635	-0.00636457	13.3647	9.68417e-35	6.97361e-34	67.9939
FLJ20628	-0.171566	-0.159135	-12.4209	8.10217e-31	4.70748e-30	59.0254
HERC5	0.171528	-0.0501717	14.0802	8.48795e-38	7.36867e-37	74.9881
PLEKHG2	0.171497	0.0325303	12.3885	1.09873e-30	6.33812e-30	58.723
PKN2	0.171373	-0.0170871	12.4168	8.42276e-31	4.89082e-30	58.9869
ZNF397	0.171189	-0.0326914	12.2327	4.72293e-30	2.63411e-29	57.2757
RIMS1	-0.171147	-0.0518294	-16.9882	8.89283e-51	2.02597e-49	104.707
IL7	0.171121	0.0459854	12.0852	1.86319e-29	1.00524e-28	55.9137
HLTF	-0.171063	-0.0726425	-12.6028	1.45515e-31	8.79823e-31	60.7298
BCAT2	0.171059	0.0367332	19.7252	1.71537e-63	1.70147e-61	133.839
HMP19	-0.171016	-0.0312644	-20.6339	9.20446e-68	1.61848e-65	143.624
CD2BP2	-0.170946	-0.0706456	-15.9707	3.7529e-46	5.68877e-45	94.1133
KIAA0513	-0.170891	-0.0292389	-15.466	6.89609e-44	8.85097e-43	88.9285
MICB	0.170889	0.048212	10.1549	4.96111e-22	1.87052e-21	38.967
PHGDH	0.170791	0.00283514	12.6901	6.35991e-32	3.91015e-31	61.5515
MKLN1	0.170722	0.0238014	17.9266	4.21719e-55	1.52465e-53	114.613
C12orf24	-0.170722	-0.0890445	-14.8812	2.71185e-41	2.88836e-40	82.9883
LMOD1	0.170719	-0.00386643	10.8058	1.88144e-24	7.85978e-24	44.4878
FLJ11506	-0.170657	-0.00594976	-18.712	9.4244e-59	5.09181e-57	122.978
KIAA1715	-0.170635	-0.0861098	-16.7936	6.90461e-50	1.45637e-48	102.668
CCNI	-0.170607	0.0403851	-13.9717	2.49309e-37	2.10573e-36	73.9174
KIAA1024	-0.170556	-0.0641208	-15.3847	1.59107e-43	1.98801e-42	88.0972
C6orf114	-0.170522	-0.0651456	-14.5636	6.72964e-40	6.60064e-39	79.7958
TCEAL3	-0.170431	-0.0436073	-16.4697	2.06529e-48	3.80085e-47	99.2878
SLC30A9	-0.170405	-0.0443166	-15.8928	8.42343e-46	1.24943e-44	93.3092
SLC8A2	-0.170386	0.049824	-16.4494	2.55443e-48	4.65672e-47	99.0763
C17orf60	0.170371	-0.0350249	11.1827	6.80469e-26	3.05502e-25	47.7777
YEATS4	-0.17037	-0.102215	-13.4908	2.83032e-35	2.10473e-34	69.2159
CMTM6	0.170263	0.0771996	17.886	6.50334e-55	2.29121e-53	114.182
IRF8	0.170254	-0.13943	8.03657	7.58233e-15	2.05259e-14	22.63
ZNF179	-0.170234	-0.0625269	-16.5661	7.5258e-49	1.4398e-47	100.292
C14orf152	0.170144	0.044337	14.4379	2.38264e-39	2.26908e-38	78.5392
PRDM12	-0.170093	-0.0550643	-13.6114	8.69728e-36	6.66493e-35	70.3881
DCDC2	-0.170074	-0.0929113	-8.61005	1.11902e-16	3.28938e-16	26.7851
LOC728485	-0.17002	-0.0228054	-16.0891	1.09674e-46	1.72886e-45	95.3368
STON2	0.169969	0.0160687	13.2688	2.45693e-34	1.72996e-33	67.0692
C11orf70	0.169948	0.0103911	13.6364	6.80417e-36	5.26215e-35	70.632
UQCRH	-0.169937	-0.0797038	-16.2096	3.12804e-47	5.16233e-46	96.5845
ADCY1	-0.169866	-0.0155385	-15.7948	2.32197e-45	3.32186e-44	92.3008
FYCO1	0.169833	0.0321009	17.1961	9.89316e-52	2.48189e-50	106.892
SLC43A1	0.169808	0.0242935	17.3354	2.26308e-52	6.10496e-51	108.359
LRRC7	-0.169771	-0.0770815	-13.4492	4.25069e-35	3.12374e-34	68.8119
ZC3H12C	0.169715	0.00603358	17.1062	2.55859e-51	6.20933e-50	105.946
PSMG1	-0.169692	-0.033898	-17.9316	4.00109e-55	1.45195e-53	114.665
GIMAP8	0.169644	-0.00387906	11.9048	9.86604e-29	5.1381e-28	54.2599
FNDC3B	0.169635	-0.00872079	16.3211	9.77198e-48	1.69668e-46	97.7418
C1QTNF5	0.169602	0.050064	19.219	4.03602e-61	3.03753e-59	128.404
TMEM47	0.169596	0.0557113	13.8245	1.06896e-36	8.68241e-36	72.4709
TDGF1	-0.169546	-0.00669378	-6.80736	3.05416e-11	7.03759e-11	14.4766
SAT1	0.169513	0.0278033	13.5571	1.48025e-35	1.12102e-34	69.8598
HINT1	-0.169341	-0.0238942	-16.1433	6.24042e-47	1.00168e-45	95.8976
[truncated: 13,269 more rows]
