# Supplementary material for: Identification of molecular correlations of RBM8A with autophagy in Alzheimer's disease
Source: Aging (Albany NY). 2019 Dec 9;11(23):11673–85. doi: 10.18632/aging.102571 (PMC6932873; doi:10.18632/aging.102571)
Supplement: Supplementary Table 2 [file aging-11-102571-s002..xls]

## Sheet: R8_LowHight_AD_DEG_0.05
Supplementary Table 2. Differentially expressed genes in RBM8A-low group compared to RBM8A-high group.
	logFC	AveExpr	t	P.Value	adj.P.Val	B
RPS4Y1	-0.40551	-0.537189	-4.70527	3.34285e-06	8.55824e-06	3.46082
SYT1	-0.399485	-0.536164	-7.80497	3.92339e-14	2.66174e-13	21.235
CRH	-0.361078	-0.473211	-6.63467	9.00779e-11	4.17514e-10	13.6558
FLJ45910	0.359794	0.322001	9.28451	6.09074e-19	7.31267e-18	32.1325
LAMP1	-0.356754	-0.196273	-13.1232	1.01189e-33	1.08733e-31	65.7867
S100A8	0.349697	-0.229857	6.37465	4.39984e-10	1.86913e-09	12.1085
ENSA	-0.331058	-0.155211	-10.6514	7.22038e-24	1.6315e-22	43.3313
PLP1	-0.325151	-0.165357	-12.0391	2.86849e-29	1.46779e-27	55.6333
BMP4	0.307989	0.181468	11.4558	5.92171e-27	2.11715e-25	50.3585
SST	-0.300335	-0.344177	-7.81326	3.70174e-14	2.52109e-13	21.2921
APOD	0.297215	0.151672	9.71726	1.86933e-20	2.71445e-19	35.5691
TNFRSF11B	0.294386	0.0519511	8.13142	3.83541e-15	2.93684e-14	23.5193
VIP	-0.291689	-0.282825	-7.6619	1.06318e-13	6.91929e-13	20.2564
CEBPD	0.291641	0.0478365	8.96723	7.32293e-18	7.70202e-17	29.6813
SPOCK3	-0.285563	-0.202312	-13.007	3.0978e-33	3.02088e-31	64.6782
OSR1	0.283491	0.121928	8.64305	8.73914e-17	8.07995e-16	27.2394
PPEF1	-0.280982	-0.331336	-7.44608	4.65965e-13	2.81999e-12	18.8071
DDX3Y	-0.280814	-0.454091	-3.54368	0.000434188	0.000827478	-1.14878
PDLIM1	0.275752	0.0110614	7.94914	1.41718e-14	1.01485e-13	22.235
DSP	0.275611	0.0421346	6.5709	1.33527e-10	6.0555e-10	13.2716
S100A9	0.275521	-0.17325	5.58745	3.91625e-08	1.29087e-07	7.74621
ADSS	-0.275193	-0.214459	-14.3327	6.89671e-39	2.05852e-36	77.5766
DEFB1	0.27441	-0.0302167	7.95235	1.3852e-14	9.92683e-14	22.2574
ARPP-19	-0.273559	-0.267185	-10.1963	3.51049e-22	6.37557e-21	39.4937
NMS	-0.272073	-0.257613	-9.76405	1.27469e-20	1.87633e-19	35.947
TMSB4Y	-0.271277	-0.273729	-5.50641	6.04867e-08	1.95217e-07	7.32538
ENPP2	-0.270523	-0.175308	-12.5076	3.60026e-31	2.49592e-29	59.968
ATP6V1A	-0.269254	-0.284401	-9.73564	1.60846e-20	2.34445e-19	35.7175
C1orf128	-0.268537	-0.216055	-13.5997	9.83378e-36	1.61191e-33	70.3781
FOLH1	-0.267789	-0.250531	-8.7149	5.07218e-17	4.82331e-16	27.7751
SLC4A10	-0.266995	-0.304495	-6.68811	6.46204e-11	3.05746e-10	13.9802
TLN1	0.266818	0.134591	12.4959	4.01933e-31	2.7765e-29	59.859
KLHDC5	-0.265418	-0.210992	-14.461	1.90553e-39	7.84186e-37	78.8517
IGF2	0.262466	0.129291	9.16106	1.61403e-18	1.85054e-17	31.1717
FKBP8	0.260229	0.132072	13.4979	2.66201e-35	4.0864e-33	69.3913
TMEFF1	-0.259105	-0.191817	-11.9048	9.90806e-29	4.6515e-27	54.4063
IGFBP4	0.257391	0.0949156	13.0204	2.7229e-33	2.74304e-31	64.806
TMEM144	-0.255892	-0.208399	-9.51177	9.90259e-20	1.31459e-18	33.9241
PICALM	-0.255449	-0.174827	-13.3579	1.042e-34	1.38996e-32	68.039
MCHR2	-0.254822	-0.277593	-7.27422	1.47727e-12	8.36455e-12	17.6763
OGN	0.253532	-0.0429305	5.31694	1.63735e-07	5.0015e-07	6.36271
S100A11	0.252766	0.0397948	9.31398	4.82054e-19	5.87886e-18	32.3631
AHDC1	0.252503	0.155375	14.3519	5.69333e-39	1.77614e-36	77.7666
SLC6A20	0.252066	0.00300539	6.24395	9.58052e-10	3.9053e-09	11.3504
DUSP4	-0.249558	-0.201965	-7.95249	1.38382e-14	9.92061e-14	22.2584
USP9Y	-0.248866	-0.224926	-4.90132	1.31447e-06	3.54893e-06	4.35621
SPTLC3	0.248531	-0.033705	6.25975	8.72624e-10	3.58122e-09	11.4414
IPO7	-0.247411	-0.182479	-14.5057	1.21613e-39	5.60055e-37	79.297
RANBP6	-0.245256	-0.199539	-11.7844	2.99297e-28	1.28644e-26	53.3121
MID1IP1	0.24372	0.124595	8.1801	2.69537e-15	2.09626e-14	23.866
MGAT5B	0.24369	0.15854	12.6037	1.45203e-31	1.08437e-29	60.8673
TOMM20	-0.243556	-0.180093	-11.3476	1.56552e-26	5.29377e-25	49.3967
ABBA-1	0.242941	0.189183	10.7996	1.99299e-24	4.87338e-23	44.6038
APBB2	-0.241386	-0.153872	-13.313	1.61114e-34	2.09145e-32	67.6072
LOC645405	-0.239716	-0.24322	-9.83421	7.16347e-21	1.0953e-19	36.5158
EPB41L3	-0.239568	-0.199377	-12.4723	5.02354e-31	3.39739e-29	59.6381
LOC730107	-0.239565	-0.152928	-13.7399	2.48076e-36	4.65854e-34	71.743
CDKN1A	0.238396	-0.0175173	8.89099	1.31943e-17	1.34036e-16	29.1013
FMOD	0.237936	0.0237251	7.29374	1.29723e-12	7.39711e-12	17.8036
C13orf31	-0.237559	-0.171868	-13.032	2.43601e-33	2.47986e-31	64.9163
PITPNB	-0.237169	-0.144953	-9.56512	6.43788e-20	8.73223e-19	34.3489
RAN	-0.236898	-0.18689	-11.421	8.09773e-27	2.8323e-25	50.0488
ZNF423	0.236096	0.181571	11.8734	1.32279e-28	6.04855e-27	54.1203
ANLN	-0.23422	-0.202345	-8.23581	1.7969e-15	1.42851e-14	24.2647
CRHBP	-0.234092	-0.199072	-9.84576	6.51361e-21	1.00069e-19	36.6097
ZNF687	0.23396	0.0485205	11.0944	1.49461e-25	4.29551e-24	47.165
ST18	-0.233898	-0.179246	-10.2572	2.10015e-22	3.93235e-21	40.0011
FAM20A	0.232571	0.0518148	7.173	2.88685e-12	1.58494e-11	17.0201
UBE2V2	-0.227115	-0.172211	-10.6535	7.08723e-24	1.60517e-22	43.3497
NUDT4P1	-0.226662	-0.201791	-11.3797	1.17418e-26	4.04112e-25	49.6812
RBM3	-0.226653	-0.233485	-7.29388	1.29596e-12	7.39206e-12	17.8046
CYorf15B	-0.225413	-0.241332	-3.9141	0.000104215	0.0002174	0.189584
P2RY12	-0.22358	-0.193063	-9.5709	6.14355e-20	8.35057e-19	34.3951
UBE2NL	-0.221211	-0.148301	-14.3976	3.60126e-39	1.26646e-36	78.2207
PTK2B	0.220755	0.1563	15.2551	6.07e-43	6.37694e-40	86.8352
MAP7	-0.220428	-0.142345	-14.6302	3.4714e-40	1.76694e-37	80.5399
GUCY1B3	-0.219859	-0.246223	-9.2075	1.11984e-18	1.31351e-17	31.5321
MOBP	-0.218953	-0.0904	-8.01147	9.08594e-15	6.64676e-14	22.6717
F13A1	0.217696	-0.0228323	5.56684	4.37612e-08	1.4339e-07	7.6387
TF	-0.216533	-0.132755	-8.58809	1.32217e-16	1.19782e-15	26.8318
BCL3	0.216528	0.115344	11.211	5.31011e-26	1.63809e-24	48.1885
S100A1	0.216414	0.210591	11.0762	1.75624e-25	4.98082e-24	47.0055
ACTN2	-0.215148	-0.223037	-9.87788	4.99769e-21	7.78304e-20	36.8712
CD34	0.214813	0.111028	9.16847	1.52269e-18	1.75205e-17	31.2291
TRIO	0.213786	0.0911468	13.9103	4.61494e-37	1.00295e-34	73.4099
CES1	0.213699	-0.0189448	7.0231	7.68336e-12	4.03069e-11	16.0619
PRELP	0.213618	0.0590972	8.33585	8.63323e-16	7.12174e-15	24.9856
PTGDS	0.21347	0.286043	6.95978	1.15625e-11	5.94791e-11	15.6621
AEBP1	0.213165	0.0275598	8.00105	9.78845e-15	7.13499e-14	22.5985
SBDSP	-0.213017	-0.110735	-17.3303	2.42824e-52	9.3934e-49	108.298
XIST	0.212174	-0.715394	2.35716	0.0188263	0.0278884	-4.57576
ZBTB7A	0.211769	0.144353	12.0005	4.10168e-29	2.0553e-27	55.2793
RAB3A	0.211639	0.0754557	9.77352	1.17953e-20	1.74422e-19	36.0236
EML2	-0.211539	-0.0912288	-10.3462	9.88506e-23	1.94503e-21	40.7456
NUPR1	0.21148	0.0400748	7.31953	1.09202e-12	6.28512e-12	17.9723
GLDN	-0.210162	-0.20926	-8.12722	3.95353e-15	3.01416e-14	23.4895
PLA2G2A	0.209976	-0.109691	6.36212	4.74331e-10	2.0058e-09	12.0353
FCGBP	0.209896	-0.1356	5.28915	1.89025e-07	5.7269e-07	6.22402
PAK1	-0.209403	-0.264591	-7.36989	7.79141e-13	4.59036e-12	18.3032
JUNB	0.208768	0.130355	9.00232	5.57819e-18	6.00142e-17	29.9495
FKBP5	0.208675	-0.0456664	5.85976	8.75096e-09	3.12925e-08	9.19938
EIF4A2	-0.208325	-0.115261	-9.98299	2.0924e-21	3.41241e-20	37.7308
CLTC	-0.208049	-0.14217	-12.5207	3.18049e-31	2.21284e-29	60.0908
MOG	-0.207969	-0.159928	-9.31295	4.86003e-19	5.91957e-18	32.3551
NEFL	-0.207878	-0.361593	-5.47183	7.26957e-08	2.3218e-07	7.1475
RASSF5	-0.207752	-0.19412	-9.83294	7.23891e-21	1.10422e-19	36.5055
TMED2	-0.207659	-0.134777	-13.2547	2.83702e-34	3.54023e-32	67.0466
TAC1	-0.207603	-0.298731	-6.05909	2.81696e-09	1.07234e-08	10.3008
HSPA8	-0.207252	-0.0249469	-10.7948	2.07801e-24	5.04936e-23	44.5625
AP1S2	-0.207167	-0.153286	-12.8527	1.35865e-32	1.16279e-30	63.2137
FLJ32679	-0.207153	-0.162214	-10.028	1.43864e-21	2.39674e-20	38.1007
C1QC	0.207133	0.0234401	7.89689	2.05303e-14	1.44375e-13	21.8709
PNPLA2	0.206651	0.159419	13.9171	4.31697e-37	9.48851e-35	73.4761
RORA	0.205948	0.106251	10.6021	1.10469e-23	2.4253e-22	42.911
FOXC1	0.205868	0.0546791	8.11825	4.21822e-15	3.20207e-14	23.4258
TMEM63C	0.20563	0.0966869	15.9429	5.06858e-46	9.80366e-43	93.8646
ITGA5	0.205381	0.0449539	8.7621	3.54186e-17	3.43564e-16	28.1287
CFH	0.205344	0.0105528	7.31537	1.12278e-12	6.44414e-12	17.9451
TMEM176A	0.205297	0.0599733	10.6616	6.61033e-24	1.5131e-22	43.4186
TBX15	0.204818	0.0515574	7.83692	3.13466e-14	2.15231e-13	21.4553
GREM1	-0.204267	-0.146425	-8.93363	9.49601e-18	9.81677e-17	29.4253
IGSF11	-0.204234	-0.107882	-11.5309	3.00362e-27	1.12154e-25	51.0301
UCHL1	-0.203886	-0.127609	-6.76152	4.08058e-11	1.97613e-10	14.4293
TEAD2	0.202666	0.0932876	12.186	7.33974e-30	4.1832e-28	56.9827
ATP6V1B2	-0.202497	-0.242001	-8.04104	7.35206e-15	5.43384e-14	22.8798
PDLIM7	0.202497	0.130661	11.9223	8.4362e-29	3.97983e-27	54.5655
ADH1B	0.202402	-0.0280423	6.17242	1.45872e-09	5.796e-09	10.9411
NEUROD2	0.201979	0.127304	12.4825	4.56195e-31	3.09605e-29	59.7336
CNDP1	-0.201507	-0.19034	-8.99262	6.01411e-18	6.42679e-17	29.8754
C5AR1	0.201352	0.0555889	9.70602	2.04896e-20	2.95534e-19	35.4786
TMEM10	-0.201311	-0.117309	-6.66925	7.26751e-11	3.41209e-10	13.8655
S100A12	0.201239	-0.126608	4.51187	8.13657e-06	1.97636e-05	2.61012
DDN	-0.201239	-0.19219	-8.39444	5.60302e-16	4.7078e-15	25.4108
RAB1A	-0.200979	-0.119655	-14.186	2.98623e-38	8.02217e-36	76.1237
IFITM2///IFITM1	0.20081	-0.00791222	7.45531	4.3773e-13	2.65493e-12	18.8684
CAMK4	-0.20002	-0.223366	-7.05701	6.16603e-12	3.26659e-11	16.2772
NDUFA4L2	0.200017	0.102897	11.4673	5.33762e-27	1.92254e-25	50.4612
SLN	-0.199945	-0.239033	-5.36775	1.25714e-07	3.89735e-07	6.61796
CPZ	0.199781	-0.0227302	7.09631	4.77297e-12	2.55801e-11	16.5278
SBDS	-0.199761	-0.138561	-17.669	6.66617e-54	4.2979e-50	111.865
MAP2K1	-0.199684	-0.228783	-9.13901	1.91914e-18	2.17076e-17	31.0011
IRF2BP1	0.199667	0.100207	15.1629	1.55688e-42	1.43396e-39	85.9012
LRP2	-0.199631	-0.155064	-8.53386	1.9858e-16	1.76513e-15	26.4315
VCAM1	0.19946	0.00968223	6.75839	4.16175e-11	2.01336e-10	14.41
PPP1R1B	0.1993	0.140339	12.9258	6.74956e-33	6.0721e-31	63.9068
SFRS5	-0.198878	-0.113575	-12.5686	2.0235e-31	1.46586e-29	60.5386
MRAS	0.198813	0.0759684	11.7546	3.93007e-28	1.66336e-26	53.0426
CBLN4	-0.198063	-0.222369	-5.92816	5.95159e-09	2.17322e-08	9.57378
UGT8	-0.197948	-0.166239	-8.89182	1.31102e-17	1.33322e-16	29.1076
CXCL1	0.197767	-0.0530382	5.13725	4.09958e-07	1.1881e-06	5.4773
GPR4	0.197346	0.00161945	7.8988	2.02548e-14	1.42513e-13	21.8842
CLPTM1	0.196859	0.155739	11.8494	1.64966e-28	7.38606e-27	53.9017
SEC23A	-0.195266	-0.209916	-9.27134	6.76114e-19	8.07746e-18	32.0296
ARID5A	0.195264	0.0429766	12.0724	2.10789e-29	1.11092e-27	55.9383
SIX1	0.195123	0.0607407	6.54806	1.53635e-10	6.89787e-10	13.1347
C4A	0.19458	-0.037335	6.04986	2.97077e-09	1.12823e-08	10.2491
HOXD1	-0.194321	-0.156654	-7.42231	5.47257e-13	3.29342e-12	18.6494
XPO7	-0.193996	-0.107388	-12.7165	4.97934e-32	4.01294e-30	61.9273
NLK	-0.193835	-0.182847	-9.81156	8.63114e-21	1.29701e-19	36.3319
FGF12	-0.193224	-0.252128	-6.44755	2.83488e-10	1.23092e-09	12.5371
TRIP10	0.19312	0.0699276	9.66783	2.7974e-20	3.9639e-19	35.1713
NALCN	-0.192918	-0.15846	-11.3621	1.3744e-26	4.68847e-25	49.5255
DLG1	-0.192826	-0.119041	-14.1681	3.57071e-38	9.20861e-36	75.9466
NAV3	-0.192717	-0.163341	-11.1466	9.41062e-26	2.79601e-24	47.6226
COPS4	-0.192652	-0.15763	-11.7528	3.99473e-28	1.68703e-26	53.0264
ACBD5	-0.192142	-0.106078	-11.5721	2.06952e-27	7.94557e-26	51.3986
H19	0.191911	0.000489006	6.19624	1.26869e-09	5.09001e-09	11.077
A4GALT	0.191622	0.0769939	8.81065	2.44462e-17	2.41201e-16	28.4938
FXYD1	0.19154	0.108711	11.5939	1.69836e-27	6.64974e-26	51.5942
SLCO4A1	0.191518	-0.00625386	5.13264	4.19581e-07	1.21417e-06	5.45494
CRABP1	0.191431	0.054562	9.48784	1.20063e-19	1.57763e-18	33.7341
COL8A1	0.191281	0.0487103	7.19695	2.46524e-12	1.36392e-11	17.1747
C1QA	0.191225	-0.0431193	6.21944	1.10697e-09	4.47462e-09	11.2097
XAB2	0.191082	0.101731	13.233	3.49975e-34	4.20448e-32	66.8386
YDD19	-0.190989	-0.150745	-11.6095	1.47303e-27	5.79093e-26	51.7351
PF4	0.190932	-0.0922169	6.2684	8.29062e-10	3.41113e-09	11.4912
OLFML2A	0.190922	0.0632757	7.28111	1.41107e-12	8.01318e-12	17.7212
IL6	0.190726	-0.158923	4.4865	9.12222e-06	2.20222e-05	2.50097
MBP	-0.19068	-0.0619355	-10.8134	1.76725e-24	4.35996e-23	44.7226
SLC32A1	-0.190651	-0.220411	-5.84506	9.50242e-09	3.3842e-08	9.1194
CFHR1	0.190012	0.0142252	7.15128	3.33002e-12	1.81639e-11	16.8803
CNN2	0.189949	0.0587666	8.18946	2.51826e-15	1.96325e-14	23.9329
PSMAL	-0.189905	-0.139087	-8.42735	4.39095e-16	3.73318e-15	25.6507
DMXL2	-0.189278	-0.225774	-8.26425	1.45983e-15	1.16774e-14	24.469
MAP1B	-0.189069	-0.196324	-7.31292	1.1413e-12	6.5427e-12	17.9291
RGS4	-0.188765	-0.244044	-6.79588	3.28612e-11	1.60627e-10	14.6408
PRR12	0.188738	0.136638	14.7766	7.90665e-41	4.63426e-38	82.0067
PRMT1	-0.188718	-0.0990558	-14.1999	2.60097e-38	7.18686e-36	76.2607
SCN3B	-0.188697	-0.229828	-6.67121	7.17934e-11	3.37537e-10	13.8774
SLC13A4	0.188445	-0.00420019	6.03777	3.1847e-09	1.2045e-08	10.1815
GABRG2	-0.188443	-0.305294	-5.57499	4.1883e-08	1.37655e-07	7.68117
HMGCS1	-0.188232	-0.179696	-8.74909	3.91076e-17	3.75767e-16	28.0311
C1R	0.188104	-0.0167551	7.1402	3.58132e-12	1.94578e-11	16.809
IFITM2	0.187631	0.0437821	6.63771	8.83953e-11	4.09912e-10	13.6743
VIM	0.187557	0.121615	6.34338	5.30653e-10	2.23468e-09	11.9259
CAPZA2	-0.187534	-0.158464	-11.4213	8.08046e-27	2.8323e-25	50.051
CA10	-0.187463	-0.192699	-7.58819	1.7675e-13	1.11832e-12	19.7577
DARC	0.187354	0.0502435	8.21567	2.08119e-15	1.64304e-14	24.1203
ALDH1A1	-0.187218	-0.0999992	-9.20255	1.16436e-18	1.36161e-17	31.4936
MLPH	0.186514	0.0062836	6.79342	3.33762e-11	1.63021e-10	14.6256
C20orf54	0.185796	0.0540947	7.09887	4.6939e-12	2.51913e-11	16.5442
MAFF	0.185568	-0.067132	5.62716	3.15889e-08	1.05325e-07	7.95439
MTA2	0.185523	0.138067	11.403	9.52533e-27	3.31365e-25	49.8882
MFAP4	0.185264	0.0912893	7.25161	1.71683e-12	9.66163e-12	17.5291
SOD3	0.185192	0.124066	10.4005	6.22472e-23	1.26072e-21	41.2025
MIR16	-0.184936	-0.165777	-13.5116	2.32794e-35	3.60216e-33	69.5242
ZNF238	-0.184794	-0.177144	-8.12857	3.91512e-15	2.99077e-14	23.4991
C8orf33	-0.18449	-0.101498	-13.0067	3.10803e-33	3.02088e-31	64.675
SCG2	-0.184242	-0.17483	-7.04194	6.80022e-12	3.58685e-11	16.1814
JARID1D	-0.183916	-0.284396	-2.65813	0.00812646	0.0127915	-3.83264
EPHX1	0.183696	0.0839516	12.0987	1.65184e-29	8.82592e-28	56.1797
PIK3CB	-0.183301	-0.187798	-10.31	1.34345e-22	2.59072e-21	40.4425
UBB	-0.183256	-0.0330185	-13.722	2.95936e-36	5.45142e-34	71.5682
LOC285281	-0.182419	-0.0946348	-7.58311	1.83026e-13	1.15689e-12	19.7235
ABHD6	-0.182217	-0.153926	-11.763	3.63809e-28	1.54655e-26	53.119
ASPA	-0.182023	-0.148963	-8.78195	3.04402e-17	2.97963e-16	28.2779
C20orf149	0.181843	0.0715303	9.29294	5.69691e-19	6.87397e-18	32.1984
SMAD6	0.181604	0.0283938	8.1914	2.48302e-15	1.94047e-14	23.9467
LOC493869	0.181577	0.0683205	7.56393	2.08757e-13	1.30927e-12	19.5945
PDE8A	-0.181358	-0.136799	-11.1177	1.21659e-25	3.5492e-24	47.3686
NMU	-0.181344	-0.203657	-6.58864	1.19715e-10	5.46372e-10	13.3782
ANGPTL4	0.181105	-0.0785837	5.19576	3.04925e-07	8.98517e-07	5.76263
C4B	0.180734	-0.0766236	5.34552	1.41157e-07	4.34341e-07	6.50602
CD163	0.180449	-0.0644618	5.82441	1.06655e-08	3.78032e-08	9.00732
RNF150	-0.180159	-0.108593	-10.2148	3.00467e-22	5.51912e-21	39.6474
BGN	0.18002	0.0787924	10.1808	4.00174e-22	7.21358e-21	39.3643
CSDA	0.179987	-0.0785418	5.42003	9.55809e-08	3.00752e-07	6.88282
TMTC2	-0.179889	-0.120547	-10.2589	2.07136e-22	3.8822e-21	40.0148
CNNM1	0.179793	0.110004	17.3916	1.26861e-52	6.13434e-49	108.942
ZNF708	-0.179756	-0.0633555	-11.0935	1.50667e-25	4.32373e-24	47.1571
TUBB6	0.179694	-0.0119521	6.6058	1.07691e-10	4.9418e-10	13.4815
C12orf53	0.17948	0.141642	9.82312	7.84844e-21	1.18783e-19	36.4257
GADD45B	0.179459	-0.0383567	6.16996	1.4798e-09	5.87366e-09	10.9271
HSD11B2	0.179304	-0.0346578	6.47495	2.40068e-10	1.0524e-09	12.6993
EGR2	-0.179132	-0.158302	-5.83096	1.02824e-08	3.65123e-08	9.04283
PRNP	-0.1788	-0.0990391	-10.1798	4.03481e-22	7.25965e-21	39.3562
RSAD2	-0.178696	-0.12676	-8.78618	2.94734e-17	2.89231e-16	28.3097
DLG4	0.178485	0.101278	10.6855	5.372e-24	1.24587e-22	43.6236
FGFRL1	0.178387	0.119935	9.29203	5.73805e-19	6.91929e-18	32.1913
RANBP5	-0.17833	-0.10829	-13.5393	1.77611e-35	2.83913e-33	69.7923
FZD3	-0.178063	-0.172504	-8.65643	7.89902e-17	7.34886e-16	27.3389
TNKS1BP1	0.177882	0.131865	14.3801	4.29236e-39	1.43143e-36	78.0467
D4S234E	-0.177744	-0.251496	-7.0753	5.47406e-12	2.91438e-11	16.3937
ATOH8	0.177579	0.0328653	7.42853	5.24725e-13	3.16274e-12	18.6906
PODN	0.177478	0.124121	9.30232	5.28828e-19	6.4089e-18	32.2718
RGS1	0.177367	-0.155745	3.71038	0.000231811	0.000458831	-0.561999
ZNF286A	-0.177076	-0.101358	-10.7076	4.43717e-24	1.03402e-22	43.8126
ZNF326	-0.177054	-0.0813759	-11.6317	1.20427e-27	4.80269e-26	51.9344
ZNF66	-0.176902	-0.0597651	-11.0432	2.35052e-25	6.53214e-24	46.7173
TMEM125	-0.17679	-0.123577	-7.65336	1.12794e-13	7.29897e-13	20.1984
GPR158	-0.176507	-0.258267	-6.14088	1.75364e-09	6.87453e-09	10.7619
NFE2	0.176105	0.0224526	7.56893	2.01726e-13	1.26681e-12	19.6281
FAM84A	-0.1761	-0.218823	-6.94806	1.2467e-11	6.38773e-11	15.5884
C5orf40	-0.176061	-0.205868	-6.94595	1.26372e-11	6.46981e-11	15.5751
FLJ22655	-0.17598	-0.0492582	-6.05639	2.86101e-09	1.08834e-08	10.2857
SLC22A2	0.175843	0.0165037	6.25453	9.00015e-10	3.68269e-09	11.4113
PCDHGB8P	0.17564	0.154631	12.015	3.58609e-29	1.81102e-27	55.4123
LILRB3	0.175315	-0.0363112	6.15525	1.61266e-09	6.35666e-09	10.8434
BTAF1	-0.175247	-0.134163	-14.1246	5.50413e-38	1.36488e-35	75.5176
TPPP	-0.175218	-0.0900443	-13.5212	2.11875e-35	3.35909e-33	69.6175
GPR37	-0.174825	-0.17435	-8.29609	1.15615e-15	9.39199e-15	24.6983
MT1A	0.174703	-0.070407	5.65705	2.685e-08	9.04446e-08	8.11189
VGF	-0.174635	-0.183919	-4.84639	1.7129e-06	4.56223e-06	4.10197
RAB20	0.17463	0.0279859	7.85603	2.73981e-14	1.90145e-13	21.5875
HSPA1B	0.174584	0.0562106	5.04997	6.34227e-07	1.78927e-06	5.05703
ARMC1	-0.174383	-0.11531	-12.6009	1.49138e-31	1.10947e-29	60.8408
TIMP1	0.174136	-0.10003	5.70947	2.01551e-08	6.9096e-08	8.38991
TP53	0.174065	0.127434	11.0002	3.43746e-25	9.31194e-24	46.3414
NOLC1	-0.174023	-0.120604	-13.8296	1.02472e-36	2.0433e-34	72.6193
UNC5A	0.174006	0.0985685	14.3734	4.59112e-39	1.45576e-36	77.98
SOX2OT	-0.17374	-0.112955	-9.94614	2.84109e-21	4.56453e-20	37.4288
SLC4A11	0.173647	0.0368784	7.69273	8.58682e-14	5.64343e-13	20.4661
GOT1	-0.173637	-0.211416	-8.09681	4.92367e-15	3.7027e-14	23.2738
PCDHGB7	0.173621	0.163727	13.6437	6.38491e-36	1.07389e-33	70.8061
NAPG	-0.173446	-0.16546	-9.30132	5.33046e-19	6.45193e-18	32.264
PLTP	0.17338	0.121141	10.3838	7.17447e-23	1.4425e-21	41.0622
RALB	-0.173357	-0.142638	-11.2836	2.77628e-26	8.99478e-25	48.83
SPTBN1	-0.173225	-0.10396	-10.7086	4.39984e-24	1.02656e-22	43.8209
FAM78A	0.173178	0.0842559	13.4612	3.80963e-35	5.66814e-33	69.0361
TMEM66	-0.172712	-0.11496	-12.3808	1.18788e-30	7.58285e-29	58.7859
FLJ20160	-0.172687	-0.203448	-8.50719	2.42399e-16	2.12919e-15	26.2353
TMSL3	-0.172194	0.136484	-11.0536	2.14418e-25	5.97589e-24	46.8082
RAMP2	0.172074	0.140058	9.83279	7.24811e-21	1.10475e-19	36.5042
MKNK2	0.171869	0.0610308	8.33583	8.63431e-16	7.12174e-15	24.9855
CA14	-0.171322	-0.122787	-8.36634	6.8957e-16	5.7391e-15	25.2066
NKIRAS1	-0.171283	-0.148258	-9.47127	1.37177e-19	1.79518e-18	33.6026
KCNIP1	-0.17081	-0.0956605	-9.36719	3.15595e-19	3.95866e-18	32.7809
ISLR	0.170705	0.0662728	10.8226	1.63116e-24	4.05005e-23	44.8018
NFIC	0.170171	0.0533284	10.0068	1.71702e-21	2.82643e-20	37.926
GNG2	-0.170157	-0.175807	-7.71686	7.26103e-14	4.79818e-13	20.6307
LOC286186	-0.169893	-0.0233301	-8.01265	9.00974e-15	6.596e-14	22.68
ALX3	0.169742	0.0113143	6.50528	1.99579e-10	8.83555e-10	12.8794
RARA	0.169635	0.121767	11.8904	1.13092e-28	5.22059e-27	54.2754
LYZ	0.169088	0.00920738	6.69007	6.38352e-11	3.02252e-10	13.9921
C7	0.168942	0.0226571	6.81591	2.89544e-11	1.42394e-10	14.7645
KIFAP3	-0.168744	-0.201932	-8.21631	2.07139e-15	1.63597e-14	24.1249
TBC1D9	-0.168585	-0.217211	-7.90571	1.92875e-14	1.36302e-13	21.9323
KHSRP	0.168531	0.136009	14.2535	1.5231e-38	4.39698e-36	76.7911
HPCA	0.168446	0.0956351	8.97126	7.0977e-18	7.49365e-17	29.7121
LOC158863	0.168104	0.149685	11.0779	1.73068e-25	4.92278e-24	47.02
DIRAS2	-0.168083	-0.243355	-6.39777	3.82883e-10	1.63699e-09	12.2441
GRIN2B	0.167785	0.0877561	7.98499	1.09784e-14	7.96195e-14	22.4858
FAM100A	0.167514	0.111058	15.8725	1.05169e-45	1.84925e-42	93.1407
GRIA2	-0.167329	-0.161783	-8.4948	2.65873e-16	2.32378e-15	26.1443
MAPK8	-0.167275	-0.116149	-8.96811	7.27304e-18	7.65787e-17	29.6881
C1orf90	0.16724	0.030544	8.46895	3.22344e-16	2.78711e-15	25.9548
IFITM3	0.167119	0.0592144	5.9976	4.00921e-09	1.49414e-08	9.95768
LTBR	0.167097	0.0831996	8.58547	1.34846e-16	1.21822e-15	26.8125
LOC285178	0.166951	0.0878316	8.75448	3.75369e-17	3.62114e-16	28.0715
MSX1	0.166898	0.061499	7.55809	2.1728e-13	1.36051e-12	19.5552
HBA1	0.166784	0.110405	4.42691	1.19079e-05	2.83473e-05	2.24679
KIAA1199	0.166765	0.00574352	6.44144	2.94164e-10	1.27458e-09	12.5011
RAP1GDS1	-0.166646	-0.131876	-12.6578	8.69376e-32	6.72619e-30	61.3753
IL1R2	0.166366	-0.0295659	5.402	1.05082e-07	3.28669e-07	6.79121
KCNH8	-0.166265	-0.149724	-7.32661	1.04152e-12	6.01885e-12	18.0187
LOC401015///FAM133B	-0.166021	-0.0707507	-9.91705	3.61531e-21	5.71302e-20	37.1909
U2AF1	-0.165788	-0.0807505	-11.0589	2.04636e-25	5.71975e-24	46.8543
ARL4C	-0.165749	-0.196547	-8.57089	1.50452e-16	1.35288e-15	26.7047
GPSM3	0.165539	0.0612718	8.84116	1.93502e-17	1.92626e-16	28.7241
EDG2	-0.165507	-0.110958	-9.33144	4.19584e-19	5.17576e-18	32.5
APOLD1	0.16542	-0.0214194	5.07522	5.59361e-07	1.58918e-06	5.17797
NIT2	-0.165231	-0.133415	-9.70678	2.03635e-20	2.94153e-19	35.4847
SCN1B	0.165201	0.0987972	11.3523	1.50158e-26	5.10433e-25	49.4379
LOC283547	-0.16515	-0.115537	-8.75719	3.67697e-17	3.55777e-16	28.0918
CHGB	-0.16505	-0.264248	-4.67591	3.83385e-06	9.74048e-06	3.32959
FTHP1	-0.16503	0.46182	-6.84849	2.35505e-11	1.16828e-10	14.9665
ADCYAP1	-0.164284	-0.227907	-4.84178	1.75117e-06	4.65661e-06	4.08076
SV2B	-0.164124	-0.260594	-5.68831	2.26339e-08	7.70883e-08	8.27745
ATP6AP2	-0.164058	-0.147006	-10.1337	5.94259e-22	1.04303e-20	38.9738
PAK3	-0.164058	-0.236596	-6.39637	3.86135e-10	1.65016e-09	12.2358
CX3CR1	-0.163914	-0.169033	-6.15612	1.60445e-09	6.32687e-09	10.8484
B3GALT2	-0.163864	-0.181529	-6.46727	2.5153e-10	1.09846e-09	12.6538
LRP10	0.163651	0.0520888	8.49637	2.62776e-16	2.29878e-15	26.1558
MAPRE3	0.163615	0.143809	12.4244	7.88285e-31	5.15102e-29	59.1919
IFITM1	0.163437	0.0121072	6.44609	2.86006e-10	1.24062e-09	12.5285
LOC647979	-0.163384	-0.101591	-12.6866	6.61163e-32	5.21968e-30	61.6464
RIOK3	-0.163364	-0.126147	-15.2716	5.12385e-43	5.82973e-40	87.0032
PTPLAD1	-0.163041	-0.109645	-11.3805	1.16575e-26	4.01923e-25	49.6884
FRMPD2	-0.16304	-0.182092	-5.27059	2.07991e-07	6.26825e-07	6.13173
TMTC3	-0.163	-0.0972044	-11.031	2.61848e-25	7.18393e-24	46.6105
ITGA8	0.162853	0.063262	9.74141	1.53439e-20	2.23987e-19	35.764
C14orf126	-0.162617	-0.0447074	-11.3401	1.67546e-26	5.64579e-25	49.3295
RTN1	-0.162576	-0.126942	-5.77296	1.4199e-08	4.95735e-08	8.72964
NES	0.162548	0.0868806	9.00796	5.33893e-18	5.75938e-17	29.9927
ZMYND11	-0.162267	-0.117168	-13.6414	6.5283e-36	1.08854e-33	70.7841
C1S	0.16202	-0.0329195	6.65252	8.06358e-11	3.7555e-10	13.764
S100A10	0.162015	0.0318129	6.48773	2.22102e-10	9.77673e-10	12.7751
RAB2A	-0.161737	-0.116553	-11.4555	5.93678e-27	2.11862e-25	50.3559
RELN	-0.161735	-0.134084	-8.0441	7.19244e-15	5.32197e-14	22.9013
BNIP3	-0.161701	-0.120791	-11.4777	4.85896e-27	1.76326e-25	50.5542
DPP9	0.161681	0.127736	12.5874	1.69388e-31	1.25056e-29	60.7147
CYorf15A	-0.161602	-0.0859287	-4.41021	1.28244e-05	3.03946e-05	2.17611
LILRB5	0.16157	0.058125	6.48479	2.26116e-10	9.93986e-10	12.7577
KLF15	0.161221	0.0442071	6.35909	4.83033e-10	2.04036e-09	12.0176
JMJD3	0.161191	0.0993541	12.4497	6.21041e-31	4.11376e-29	59.4281
SLC22A6	0.161045	0.0253405	7.31716	1.10943e-12	6.37512e-12	17.9568
ACTR2	-0.160941	-0.10807	-11.935	7.50634e-29	3.59375e-27	54.6811
ATP5F1	-0.160725	-0.124623	-13.0189	2.76346e-33	2.76947e-31	64.7914
GNAI1	-0.160488	-0.112593	-11.8579	1.52502e-28	6.89179e-27	53.9795
ARMCX3	-0.160465	-0.134532	-14.236	1.81391e-38	5.08474e-36	76.6179
RABEP1	-0.160427	-0.117683	-9.78161	1.10375e-20	1.63467e-19	36.0891
TWIST1	0.160425	0.0474536	8.5167	2.25766e-16	1.98941e-15	26.3052
ZNF580	0.160402	0.114143	14.3744	4.54473e-39	1.45576e-36	77.99
MTMR6	-0.160339	-0.142208	-9.97344	2.26524e-21	3.68807e-20	37.6524
PRDM6	0.160259	0.0138933	5.98447	4.32146e-09	1.60372e-08	9.88478
PPBP	0.160193	-0.0712052	4.99467	8.335e-07	2.31332e-06	4.79412
TBRG1	-0.160121	-0.0766673	-9.96082	2.51536e-21	4.0645e-20	37.549
LRRC8B	-0.15992	-0.120058	-10.1363	5.81408e-22	1.02512e-20	38.9954
ANXA2P1	0.159763	-0.0253427	5.86443	8.52481e-09	3.05346e-08	9.22481
TPM4	0.159709	0.107783	11.5623	2.26045e-27	8.64062e-26	51.3113
KLHL8	-0.159576	-0.132489	-10.2782	1.75962e-22	3.32693e-21	40.1759
RASGRP3	-0.159554	-0.0172605	-8.32142	9.59964e-16	7.88434e-15	24.8812
ZNF479	-0.159402	-0.0380416	-10.7578	2.86891e-24	6.82541e-23	44.2436
SERPINA3	0.158803	-0.416905	2.95731	0.00326034	0.00547647	-3.00836
MRAP	0.158748	0.0211675	6.77807	3.67691e-11	1.7896e-10	14.531
HIG2	0.158332	-0.0366674	5.13627	4.11982e-07	1.19361e-06	5.47255
HNRPA3	-0.158221	-0.113213	-14.707	1.5993e-40	8.83818e-38	81.3083
SERPIND1	0.158144	0.00575584	6.03744	3.19077e-09	1.2061e-08	10.1797
JUP	0.157834	0.130329	8.98826	6.2213e-18	6.62259e-17	29.842
FAM89A	0.157514	0.0616683	8.39367	5.63524e-16	4.73076e-15	25.4052
NDUFS2	-0.157474	-0.120374	-14.4229	2.79428e-39	1.05974e-36	78.4722
MT1G	0.157022	0.030157	4.86714	1.5503e-06	4.14857e-06	4.19773
RUFY3	-0.156838	-0.126113	-9.84288	6.67019e-21	1.02311e-19	36.5863
THAP5	-0.156702	-0.16252	-7.31846	1.09981e-12	6.32359e-12	17.9654
FREM3	-0.156497	-0.214341	-4.61016	5.1976e-06	1.29954e-05	3.03838
EVI2A	-0.156488	-0.100119	-6.79228	3.36165e-11	1.64153e-10	14.6186
NELL2	-0.1564	-0.23423	-5.37327	1.22145e-07	3.79278e-07	6.64579
PPFIA2	-0.156339	-0.150213	-9.50261	1.06609e-19	1.40849e-18	33.8513
PJA2	-0.155924	-0.12197	-9.20066	1.18187e-18	1.37959e-17	31.4789
CMAS	-0.155707	-0.174768	-9.43136	1.8895e-19	2.42191e-18	33.2868
SRD5A3	-0.155631	-0.0641128	-9.53564	8.16869e-20	1.09342e-18	34.114
C1QL3	-0.155616	-0.248352	-5.4768	7.08055e-08	2.26488e-07	7.17299
NOTCH3	0.155608	0.122195	8.86652	1.59261e-17	1.60523e-16	28.9159
NELF	0.155545	0.0848133	10.709	4.38343e-24	1.02397e-22	43.8246
ERBB3	-0.155286	-0.115741	-8.73564	4.33253e-17	4.13622e-16	27.9303
CFB	0.155147	0.0222421	6.87659	1.96947e-11	9.88158e-11	15.1413
CD74	0.155089	0.0508664	6.63027	9.25664e-11	4.28227e-10	13.6292
C14orf44	-0.154876	-0.163884	-10.1366	5.80342e-22	1.02418e-20	38.9972
HBA2	0.154847	0.102751	4.16396	3.72415e-05	8.28341e-05	1.16259
KCNJ3	-0.154693	-0.171179	-6.87754	1.95763e-11	9.83235e-11	15.1472
FXYD5	0.154677	0.0547	8.82549	2.18199e-17	2.16543e-16	28.6058
PHF1	0.154662	0.0753531	13.9283	3.86476e-37	8.5922e-35	73.5858
FAM27L	-0.15453	-0.0542584	-7.69811	8.27179e-14	5.44194e-13	20.5028
KDR	0.154333	0.0503553	7.74272	6.06446e-14	4.0406e-13	20.8074
FGF1	-0.154206	-0.0710523	-8.95137	8.27895e-18	8.63708e-17	29.5604
FAM135A	0.154113	0.200592	8.12421	4.04042e-15	3.07555e-14	23.4681
GPRIN1	0.153978	0.101334	13.2259	3.75049e-34	4.42329e-32	66.77
C4orf33	-0.153569	-0.12472	-11.7416	4.42596e-28	1.86102e-26	52.925
URP2	0.153304	0.00974566	7.56333	2.0962e-13	1.31425e-12	19.5904
BAG3	0.153168	-0.0206016	4.58141	5.93055e-06	1.47251e-05	2.91225
KIAA1949	0.15307	0.0492696	9.01987	4.8667e-18	5.27644e-17	30.084
ANK3	-0.15297	-0.139022	-10.8923	8.86465e-25	2.27454e-23	45.4047
KCNJ9	-0.152855	-0.135259	-9.96268	2.47679e-21	4.00888e-20	37.5643
FZD9	0.15266	0.0817233	10.3685	8.17418e-23	1.62492e-21	40.9333
LOC645652	0.152587	0.036783	7.09134	4.93054e-12	2.64027e-11	16.4961
SLC16A3	0.152528	0.0583709	9.63864	3.54715e-20	4.97212e-19	34.937
HACL1	-0.152479	-0.125343	-10.3232	1.20083e-22	2.33433e-21	40.5534
KLK14	0.15239	0.0734783	10.9512	5.28617e-25	1.37857e-23	45.9159
MARK1	-0.152356	-0.142885	-8.41124	4.94783e-16	4.19006e-15	25.5332
MT2A	0.15234	0.103201	4.01504	6.92116e-05	0.000148282	0.575896
C1orf78	0.15225	0.0635531	8.07481	5.76864e-15	4.31466e-14	23.1181
NNT	-0.152173	-0.117107	-10.3774	7.57879e-23	1.51279e-21	41.0081
PROSC	-0.152086	-0.104439	-14.405	3.34375e-39	1.22028e-36	78.2942
C3orf14	-0.152027	-0.154239	-9.84925	6.32872e-21	9.73828e-20	36.6381
SH3GL3	-0.151951	-0.109152	-11.8819	1.22368e-28	5.62196e-27	54.1974
GYPC	0.151944	0.0486387	7.26392	1.58202e-12	8.92634e-12	17.6092
LRRC33	0.151913	0.100705	11.6634	9.03179e-28	3.64703e-26	52.2191
HOOK2	0.151851	0.00800651	9.82001	8.05168e-21	1.21574e-19	36.4004
GEFT	0.151826	0.145457	13.4098	6.28795e-35	9.009e-33	68.5395
TERF2IP	-0.151548	-0.130151	-11.409	9.02415e-27	3.14496e-25	49.9417
POLR3K	-0.151452	-0.145783	-10.8588	1.18891e-24	3.00992e-23	45.1145
C4BPA	0.151397	0.136238	8.0989	4.85015e-15	3.65168e-14	23.2886
OTUD1	-0.151338	-0.133681	-11.8449	1.71896e-28	7.66084e-27	53.861
SCAMP4	0.151324	0.127854	10.6159	9.80802e-24	2.16644e-22	43.0286
S100A4	0.15124	0.0179203	6.64047	8.68957e-11	4.03538e-10	13.691
LOC653506	0.151197	0.0485608	9.27689	6.46998e-19	7.74396e-18	32.073
GTF2A1	0.151183	0.122653	6.06926	2.65638e-09	1.01602e-08	10.3579
ZNF441	-0.150868	-0.0292164	-12.0578	2.41273e-29	1.25787e-27	55.8046
ARHGEF9	-0.150784	-0.156581	-7.98028	1.13533e-14	8.21224e-14	22.4528
NUAK2	0.150758	0.0543782	8.16981	2.90438e-15	2.24706e-14	23.7926
SNED1	0.150727	0.088481	9.59018	5.25584e-20	7.20981e-19	34.5491
CIC	0.150719	0.0743296	12.3692	1.32371e-30	8.28583e-29	58.6787
TCIRG1	0.15068	0.0336357	9.05179	3.79585e-18	4.1809e-17	30.3288
TMEM41B	-0.150647	-0.120369	-11.7018	6.36216e-28	2.62942e-26	52.5659
CCNT1	0.150423	0.10927	13.1093	1.15733e-33	1.23675e-31	65.6536
TOMM70A	-0.150323	-0.156111	-10.5378	1.92125e-23	4.0926e-22	42.3641
ATP1B1	-0.150271	-0.0930447	-7.46638	4.06063e-13	2.46983e-12	18.942
RBM8A	-0.150152	-0.0767562	-29.8231	2.7078e-110	5.23742e-106	240.535
ATXN7L3	0.149979	0.0710234	13.3495	1.13072e-34	1.49798e-32	67.9581
FAM13C1	-0.149933	-0.120382	-11.8921	1.11347e-28	5.15234e-27	54.2908
SELT	-0.149858	-0.102824	-14.2989	9.68002e-39	2.83683e-36	77.2405
RTEL1	0.149833	0.0354563	9.17397	1.45825e-18	1.6839e-17	31.2718
CNOT7	-0.14978	-0.128639	-11.193	6.23305e-26	1.90759e-24	48.03
VASN	0.149779	0.0190556	8.62922	9.70093e-17	8.93501e-16	27.1366
COPS5	-0.149675	-0.101629	-14.6521	2.78409e-40	1.4554e-37	80.7586
MRGPRF	0.14958	0.0266372	6.14227	1.73953e-09	6.82196e-09	10.7698
FDPS	-0.149434	-0.108335	-12.6248	1.18843e-31	9.08564e-30	61.0657
ZFP36	0.149323	0.0158789	7.25403	1.68949e-12	9.51052e-12	17.5448
GPR137C	-0.14932	-0.163713	-9.28654	5.99382e-19	7.20701e-18	32.1483
MAP3K10	0.149141	0.116335	12.5295	2.92705e-31	2.05127e-29	60.173
ABHD8	0.149082	0.0606476	14.4051	3.33955e-39	1.22028e-36	78.2955
PLCL1	-0.149012	-0.124123	-11.8339	1.90179e-28	8.41748e-27	53.761
HBS1L	-0.148975	-0.130867	-10.7752	2.46545e-24	5.90915e-23	44.3935
GJA4	0.148933	-0.00808888	6.00584	3.82464e-09	1.42894e-08	10.0035
FOXD1	0.148776	0.0800071	8.31588	9.99869e-16	8.19469e-15	24.8412
HN1	-0.148775	-0.179811	-7.93746	1.53986e-14	1.09904e-13	22.1534
GHITM	-0.148743	-0.034284	-9.63922	3.53065e-20	4.95572e-19	34.9416
WDTC1	0.148667	0.105726	14.4277	2.66362e-39	1.0304e-36	78.5197
ISYNA1	0.14847	0.0623757	8.77207	3.28249e-17	3.19849e-16	28.2036
CNTFR	0.148321	0.134071	11.4755	4.95553e-27	1.79494e-25	50.5347
RAP2A	-0.148223	-0.126505	-7.76779	5.09056e-14	3.41762e-13	20.9793
HSP90AA1	-0.148192	-0.0741505	-8.89601	1.26936e-17	1.29289e-16	29.1394
PTPRD	-0.148042	-0.0988737	-13.9476	3.19069e-37	7.17608e-35	73.7757
PRKAR1A	-0.147874	-0.13884	-11.3018	2.36057e-26	7.7782e-25	48.9904
SBNO2	0.147738	0.0844623	8.9047	1.18712e-17	1.21682e-16	29.2054
NELL1	-0.147717	-0.273372	-5.06738	5.81634e-07	1.6481e-06	5.14037
SDC3	0.147441	0.0917468	9.02519	4.66968e-18	5.08277e-17	30.1247
CLDN11	-0.147415	-0.094801	-5.98102	4.40735e-09	1.63277e-08	9.86565
FAM49B	-0.147332	-0.11602	-10.5297	2.06123e-23	4.37632e-22	42.2946
MAST1	0.147215	0.0386951	14.8866	2.59519e-41	1.73091e-38	83.1113
PCAF	-0.147204	-0.0858214	-6.63945	8.74493e-11	4.05817e-10	13.6848
FAM98A	-0.147119	-0.134562	-14.547	8.03267e-40	3.78946e-37	79.7081
LOC145757	-0.146965	-0.0939598	-9.89153	4.46485e-21	7.00398e-20	36.9825
TSKU	0.146906	0.080311	8.19052	2.49894e-15	1.95133e-14	23.9404
CYP1B1	0.146894	0.00124605	6.78247	3.57639e-11	1.74243e-10	14.5581
FCF1	-0.146883	-0.0836518	-11.6515	1.00594e-27	4.05352e-26	52.1125
ALCAM	-0.146757	-0.12954	-11.3345	1.76166e-26	5.90539e-25	49.2799
SEC63	-0.146652	-0.0764644	-16.2545	1.98417e-47	5.48253e-44	97.0786
NEUROD6	-0.146606	-0.15823	-4.69117	3.57066e-06	9.1065e-06	3.39769
LSR	0.146452	0.0792882	9.88595	4.67556e-21	7.31673e-20	36.937
IFI30	0.146386	-0.10066	4.92551	1.16892e-06	3.17993e-06	4.46896
TNFRSF1A	0.14638	0.0197332	7.14544	3.46021e-12	1.88386e-11	16.8427
VNN2	0.146294	0.00400006	5.14922	3.85952e-07	1.12257e-06	5.53545
ERMP1	-0.146274	-0.112078	-14.5875	5.34277e-40	2.58349e-37	80.1124
VLDLR	-0.146231	-0.11357	-10.3931	6.62988e-23	1.33997e-21	41.1402
CDA	0.146008	0.0413114	6.88441	1.87373e-11	9.43058e-11	15.19
SPTLC2	-0.145987	-0.107109	-11.3789	1.18277e-26	4.06342e-25	49.674
BTBD2	0.145869	0.105395	15.0166	6.91823e-42	5.35249e-39	84.4222
WNT6	0.145591	0.0672198	8.55233	1.72929e-16	1.54565e-15	26.5676
CALB1	-0.145569	-0.246504	-4.54815	6.90252e-06	1.69492e-05	2.76721
QPCT	-0.145535	-0.154436	-7.36383	8.1154e-13	4.76962e-12	18.2632
B4GALT1	0.145525	0.0497092	8.03432	7.715e-15	5.68038e-14	22.8324
IMPAD1	-0.145282	-0.139246	-9.32654	4.36247e-19	5.36079e-18	32.4616
EXOC5	-0.145257	-0.0995841	-9.46346	1.46059e-19	1.90369e-18	33.5407
GBP2	0.145207	-0.158156	5.0115	7.67185e-07	2.14156e-06	4.87388
HDHD2	-0.145207	-0.108097	-14.1731	3.39557e-38	8.87528e-36	75.9964
EID1	-0.144984	-0.0702042	-11.3003	2.39267e-26	7.8706e-25	48.9771
TINAGL1	0.144973	0.117557	7.78262	4.58879e-14	3.09148e-13	21.0812
SNCA	-0.144965	-0.178855	-7.73381	6.45271e-14	4.28895e-13	20.7465
IL18R1	0.144868	-0.00249526	4.6631	4.06919e-06	1.03073e-05	3.27256
SHC4	-0.144813	-0.108376	-9.28161	6.23251e-19	7.47824e-18	32.1098
MFSD4	-0.144754	-0.155785	-7.11051	4.34999e-12	2.34236e-11	16.6187
BDNF	-0.144602	-0.149426	-5.14233	3.996e-07	1.16e-06	5.50196
KLHL34	0.144557	0.0573079	8.64042	8.91478e-17	8.2384e-16	27.2198
PDIA3	-0.144425	-0.0754525	-12.441	6.74581e-31	4.45316e-29	59.3462
PCTK2	-0.144291	-0.100875	-10.9542	5.15176e-25	1.35021e-23	45.9414
GAS1	0.144286	-0.00182717	6.05321	2.91399e-09	1.10797e-08	10.2679
PXN	0.144232	0.0582444	8.3534	7.5862e-16	6.28135e-15	25.1128
LOC493754	-0.14407	-0.114598	-13.0806	1.52622e-33	1.61313e-31	65.3795
LMO3	-0.144039	-0.15287	-7.87736	2.35702e-14	1.64464e-13	21.7353
ITPKB	0.143924	0.0183377	5.96449	4.84264e-09	1.78616e-08	9.77412
CHN2	-0.14377	-0.125235	-10.861	1.16653e-24	2.95714e-23	45.1333
TNFRSF25	0.143744	0.0616621	10.5324	2.01362e-23	4.27993e-22	42.3177
ANKRD56	-0.143722	-0.254498	-5.57212	4.25368e-08	1.39709e-07	7.66617
MT1X	0.143591	0.0206264	5.43432	8.86479e-08	2.80351e-07	6.95563
FEN1	-0.143509	-0.125968	-11.2201	4.89469e-26	1.52699e-24	48.2691
ZEB1	-0.143256	-0.100211	-11.7373	4.60173e-28	1.93073e-26	52.8864
ITGB4	0.143233	0.0615688	8.51826	2.23154e-16	1.96909e-15	26.3167
ZNF91	-0.142679	-0.104647	-8.94802	8.49631e-18	8.84952e-17	29.5349
MEOX2	0.142508	0.0153925	7.43223	5.1177e-13	3.08754e-12	18.7152
C12orf5	-0.142489	-0.139844	-11.3334	1.77816e-26	5.95039e-25	49.2707
MORF4	-0.142401	-0.119063	-11.7916	2.80045e-28	1.21177e-26	53.3779
COL6A3	0.142392	-0.00750897	5.31635	1.64241e-07	5.014e-07	6.35973
KLF5	0.142377	0.0359484	8.40222	5.28958e-16	4.46578e-15	25.4675
TMEM85	-0.142365	-0.123289	-12.7837	2.62566e-32	2.17963e-30	62.5611
KCNK1	-0.142321	-0.169063	-6.16809	1.49612e-09	5.93479e-09	10.9164
OLAH	0.142291	0.0198544	6.99368	9.29339e-12	4.82817e-11	15.8758
CRABP2	0.142286	0.0422683	8.77025	3.32847e-17	3.24166e-16	28.1899
RAB3GAP1	-0.14224	-0.124057	-12.0556	2.46369e-29	1.27755e-27	55.7839
PCMT1	-0.142188	-0.15473	-7.76277	5.27215e-14	3.53585e-13	20.9449
CRISPLD2	0.141897	-0.00227186	5.98653	4.271e-09	1.58621e-08	9.8962
ARMCX4	-0.141887	-0.166703	-10.2404	2.42037e-22	4.48848e-21	39.861
DLG3	-0.141843	-0.154368	-7.13856	3.62002e-12	1.96625e-11	16.7985
C10orf11	0.141732	0.0830343	7.50673	3.08619e-13	1.90835e-12	19.2111
MTMR4	-0.141676	-0.116758	-8.26995	1.40022e-15	1.12518e-14	24.51
NETO2	-0.141637	-0.153658	-7.37251	7.65561e-13	4.51999e-12	18.3204
MBD3	0.141592	0.0532038	12.2111	5.8097e-30	3.37451e-28	57.2142
TRPM4	0.141565	0.180633	8.22544	1.93813e-15	1.53762e-14	24.1903
NRXN3	-0.141492	-0.148813	-7.00012	8.91503e-12	4.64157e-11	15.9165
TP53INP2	-0.14143	-0.0704485	-7.37095	7.73624e-13	4.56481e-12	18.3101
RCE1	0.141426	0.143539	13.7388	2.50735e-36	4.66319e-34	71.7325
PF4V1	0.14135	-0.0375108	6.323	5.99326e-10	2.50913e-09	11.8073
KIAA1189	-0.141312	-0.086567	-6.88398	1.87884e-11	9.45138e-11	15.1873
RAB3IL1	0.141231	0.101817	10.5921	1.20491e-23	2.63041e-22	42.8252
PTGDR	0.141186	0.0246727	5.56895	4.32668e-08	1.41914e-07	7.6497
CDC42	-0.140974	-0.116109	-9.00782	5.34484e-18	5.76254e-17	29.9916
DCAKD	0.140963	0.108072	11.7681	3.47377e-28	1.47995e-26	53.1647
GDF15	0.140794	0.0168737	6.50372	2.01493e-10	8.91418e-10	12.8701
CEP68	-0.140769	-0.131932	-11.2909	2.60292e-26	8.51874e-25	48.8938
MBTPS2	-0.140746	-0.111865	-8.52113	2.18412e-16	1.929e-15	26.3378
GSK3B	0.140734	0.0795964	10.1278	6.24774e-22	1.09262e-20	38.9243
IDH3A	-0.140512	-0.126797	-8.99633	5.84363e-18	6.26886e-17	29.9037
RHBDF2	0.140433	-0.0053845	5.41384	9.87468e-08	3.10159e-07	6.85132
C13orf8	0.140303	0.088615	10.2034	3.30744e-22	6.03514e-21	39.5525
C10orf6	-0.14024	-0.0624846	-10.2217	2.83597e-22	5.2142e-21	39.7044
AGTPBP1	-0.140218	-0.123914	-12.0908	1.77825e-29	9.44916e-28	56.1067
B4GALT6	-0.140123	-0.184129	-6.60522	1.08078e-10	4.95838e-10	13.478
GLRB	-0.140105	-0.190215	-5.54254	4.98623e-08	1.6239e-07	7.51234
ARHGAP20	-0.140082	-0.181204	-6.78652	3.48611e-11	1.70016e-10	14.5831
STARD8	0.140066	0.0539661	9.46158	1.48272e-19	1.93123e-18	33.5259
VSIG4	0.140052	-0.0640195	4.99612	8.27568e-07	2.29851e-06	4.80099
LOC441019	0.139746	0.128338	4.52318	7.7306e-06	1.88509e-05	2.65899
NME7	-0.139648	-0.128545	-11.2192	4.93369e-26	1.53174e-24	48.2612
SLPI	0.139617	-0.0172475	5.89516	7.17157e-09	2.59227e-08	9.39266
ABHD10	-0.139499	-0.11928	-10.3793	7.45528e-23	1.49275e-21	41.0243
RGL3	0.13944	0.101545	6.53579	1.65625e-10	7.40012e-10	13.0614
BBC3	0.139432	0.0703439	14.0942	7.449e-38	1.77875e-35	75.2177
CLIP2	0.139398	0.0724328	12.006	3.8972e-29	1.96301e-27	55.3299
CNTN1	-0.139304	-0.125901	-8.36409	7.01137e-16	5.83035e-15	25.1903
METTL7B	0.13923	-0.012796	7.76257	5.27964e-14	3.53965e-13	20.9435
SORL1	-0.139135	-0.117218	-11.9383	7.27704e-29	3.51004e-27	54.7118
CD68	0.139111	0.043508	7.69073	8.70708e-14	5.71665e-13	20.4524
STAB1	0.139106	0.0206903	7.32001	1.0885e-12	6.26888e-12	17.9755
PKP4	-0.139104	-0.070209	-9.07244	3.2312e-18	3.58154e-17	30.4876
BRSK1	0.139078	0.120076	12.1412	1.11368e-29	6.10223e-28	56.5699
SMARCA2	-0.139055	-0.109233	-12.5811	1.79758e-31	1.31203e-29	60.6559
TMED7	-0.138793	-0.0249458	-9.92535	3.37532e-21	5.3425e-20	37.2587
KRT19	0.138765	0.0556333	7.82109	3.50363e-14	2.39291e-13	21.3461
RHOC	0.138756	0.0463252	10.0212	1.52244e-21	2.52563e-20	38.0448
FLJ20628	-0.138739	-0.159135	-10.1203	6.65148e-22	1.15384e-20	38.8625
CALCOCO1	0.138683	0.0551296	14.4815	1.55166e-39	6.66937e-37	79.0554
VSIG8///C1orf204	-0.138565	-0.119992	-10.5012	2.63251e-23	5.51658e-22	42.0529
EPHA2	0.138518	0.0504859	6.62075	9.81876e-11	4.52501e-10	13.5717
CTNNA2	-0.138438	-0.0659044	-11.1749	7.31816e-26	2.21862e-24	47.8713
NEK2	-0.138421	-0.137898	-6.43315	3.09293e-10	1.33684e-09	12.4522
GRIN1	0.138364	0.06457	12.0498	2.59885e-29	1.34404e-27	55.731
HIRA	-0.138335	-0.0653296	-11.0143	3.03374e-25	8.27624e-24	46.465
VDAC3	-0.13832	-0.125569	-9.68255	2.4813e-20	3.54456e-19	35.2897
CLEC2B	0.138205	0.00947711	5.6191	3.30009e-08	1.09749e-07	7.91202
LY6E	0.13812	0.0736467	12.327	1.96658e-30	1.19615e-28	58.2867
XPOT	-0.138118	-0.118082	-11.2536	3.62976e-26	1.16044e-24	48.5648
VWC2	-0.138092	-0.11725	-5.94474	5.4178e-09	1.98769e-08	9.66507
SORBS3	0.138084	0.0762675	11.1535	8.85386e-26	2.64277e-24	47.6829
SQLE	-0.138042	-0.110287	-11.813	2.30288e-28	1.00774e-26	53.5716
ANXA2P2	0.138009	-0.0550446	4.89412	1.36107e-06	3.6691e-06	4.32275
CASKIN2	0.137979	0.0678053	10.6406	7.92297e-24	1.78817e-22	43.2395
GPRC5A	0.137889	0.0597514	6.61151	1.0396e-10	4.77625e-10	13.5159
ZIC2	0.137782	0.0493414	6.83773	2.5215e-11	1.24702e-10	14.8997
PCOLCE	0.137754	0.0624548	8.81128	2.43285e-17	2.40328e-16	28.4986
SOBP	-0.137742	-0.112505	-11.1851	6.68452e-26	2.03289e-24	47.9609
SF3B4	0.137677	0.0917378	12.3155	2.18891e-30	1.31077e-28	58.1807
PRKY	-0.137544	-0.0708548	-3.5207	0.000472539	0.00089624	-1.22768
MPHOSPH8	-0.137501	-0.0314858	-11.5481	2.57252e-27	9.69935e-26	51.1834
SLC6A15	-0.137498	-0.122472	-9.27506	6.56447e-19	7.84734e-18	32.0587
RAB5C	0.137453	0.123711	10.6216	9.34008e-24	2.07174e-22	43.0769
UBE1C	-0.137412	-0.0980111	-11.8925	1.10964e-28	5.14694e-27	54.2942
HIVEP2	-0.137404	-0.149996	-8.69946	5.70268e-17	5.37793e-16	27.6597
SH3BGRL3	0.137226	0.069809	11.6667	8.75707e-28	3.55839e-26	52.2497
ME2	-0.137039	-0.0841347	-12.269	3.38404e-30	2.00165e-28	57.7493
ZBTB16	0.137027	0.0481642	9.85763	5.90633e-21	9.14653e-20	36.7063
TMC7	-0.136928	-0.0889971	-9.45641	1.54564e-19	2.00778e-18	33.4849
ISLR2	0.13672	-0.0563808	7.66775	1.02106e-13	6.65409e-13	20.2961
FREQ	0.136691	0.108089	12.3258	1.98764e-30	1.20517e-28	58.2762
RIPK4	0.136532	0.019619	6.42396	3.26954e-10	1.40908e-09	12.398
SIPA1L3	0.136446	0.0602691	11.2216	4.8313e-26	1.51209e-24	48.282
TM6SF1	-0.1364	-0.130271	-8.22009	2.01511e-15	1.59347e-14	24.152
PCDH10	-0.136377	-0.103107	-11.2874	2.684e-26	8.75445e-25	48.8634
YARS	-0.136359	-0.156103	-9.18193	1.36964e-18	1.58727e-17	31.3336
CCT6A	-0.136271	-0.0869136	-12.0477	2.65081e-29	1.36725e-27	55.7114
RAVER1	0.136205	0.138584	11.8816	1.22702e-28	5.62393e-27	54.1947
FAM129B	0.136192	0.0807071	8.2994	1.12844e-15	9.19005e-15	24.7222
CIRBP	-0.136154	-0.102263	-5.84243	9.64327e-09	3.43373e-08	9.10512
TTBK1	0.136091	0.0856148	11.7798	3.12001e-28	1.33512e-26	53.271
SUPT6H	0.136084	0.051493	12.8558	1.31976e-32	1.13453e-30	63.2425
SMA4	-0.136061	-0.108786	-5.98995	4.18838e-09	1.55852e-08	9.91518
SYN2	-0.13602	-0.20972	-5.51555	5.76065e-08	1.86512e-07	7.3726
SLC31A2	-0.135894	-0.114919	-6.88671	1.84643e-11	9.30044e-11	15.2043
HMGN4	-0.135879	-0.000653338	-11.932	7.71308e-29	3.68362e-27	54.6542
SLC29A1	0.135854	0.0669233	10.033	1.37962e-21	2.30836e-20	38.1421
LDB2	-0.135824	-0.198549	-5.78695	1.31388e-08	4.60381e-08	8.80493
PSMC6	-0.13567	-0.106973	-12.1621	9.16234e-30	5.09247e-28	56.7631
UCP2	0.135518	0.0428662	8.3917	5.71777e-16	4.79589e-15	25.3909
SMARCB1	0.135504	0.135422	10.3403	1.03909e-22	2.03834e-21	40.6963
PTP4A1	-0.135428	-0.110056	-11.9535	6.32823e-29	3.08314e-27	54.8501
DOK2	0.135416	0.052798	7.33892	9.59108e-13	5.58313e-12	18.0995
TYROBP	0.135372	-0.0141089	5.70038	2.1185e-08	7.24087e-08	8.34159
ELK1	0.135246	0.0144103	9.12036	2.22125e-18	2.49497e-17	30.857
hCG_38480///KCTD1	-0.135219	-0.132511	-8.31398	1.01393e-15	8.3064e-15	24.8274
PCDHGC5	0.135184	0.102943	14.1428	4.59466e-38	1.15415e-35	75.6966
MLF2	0.135111	0.151642	13.0323	2.42938e-33	2.47986e-31	64.919
PCDHGA10	0.134983	0.134037	11.7326	4.80312e-28	2.01087e-26	52.844
C9orf164	-0.134975	-0.0738679	-7.80693	3.86985e-14	2.62911e-13	21.2484
CBWD2	-0.134922	-0.0884397	-12.1191	1.36644e-29	7.36202e-28	56.3674
CBX5	0.134891	0.04992	9.93536	3.10665e-21	4.93746e-20	37.3406
HECTD3	0.134839	0.117449	13.379	8.48494e-35	1.17225e-32	68.2426
ADAM33	0.134779	0.0771409	6.70377	5.86045e-11	2.78714e-10	14.0756
ZNF358	0.134752	0.0964696	11.6108	1.45687e-27	5.75076e-26	51.746
MED13L	-0.134652	-0.0863811	-8.10399	4.67527e-15	3.52138e-14	23.3247
CDKN2AIPNL	-0.134649	-0.102076	-8.64831	8.39909e-17	7.77298e-16	27.2785
TNFRSF6B	0.13449	0.0655417	9.03329	4.38438e-18	4.783e-17	30.1868
PEAR1	0.134475	0.0715911	7.27958	1.42556e-12	8.0906e-12	17.7112
GRIK2	-0.13434	-0.158848	-7.30819	1.17795e-12	6.74281e-12	17.8981
GTF2H3	-0.134338	-0.119999	-10.8088	1.8406e-24	4.52938e-23	44.6824
FKBP10	0.134199	0.083696	10.9512	5.2885e-25	1.37857e-23	45.9154
DTX3L	0.134175	0.247795	9.14356	1.85175e-18	2.10068e-17	31.0363
KIAA1467	-0.134054	-0.17658	-6.52846	1.73228e-10	7.72022e-10	13.0176
MOSPD2	-0.133825	-0.0733459	-11.6182	1.36205e-27	5.40961e-26	51.8126
CADM2	-0.133752	-0.110047	-10.4263	4.99557e-23	1.02032e-21	41.4199
VPS26A	-0.133722	-0.0878912	-12.5794	1.82708e-31	1.32855e-29	60.6397
RAB13	0.133607	0.0839389	6.89322	1.77134e-11	8.94781e-11	15.2449
IER3	0.133606	0.0446254	5.65548	2.70805e-08	9.11575e-08	8.1036
SPTBN2	0.133504	0.0706828	12.1692	8.57901e-30	4.80972e-28	56.8283
SHROOM4	-0.133495	-0.112642	-7.72135	7.03763e-14	4.65692e-13	20.6614
AOX1	0.133404	0.0186737	6.01499	3.62939e-09	1.36099e-08	10.0544
CRYM	-0.13334	-0.235152	-4.21438	3.00641e-05	6.77581e-05	1.36572
SLC27A6	-0.133314	-0.107226	-6.04635	3.03132e-09	1.14919e-08	10.2295
ESAM	0.133312	0.100181	8.74473	4.04285e-17	3.87497e-16	27.9984
STX11	0.133279	0.0665304	6.18574	1.34927e-09	5.39094e-09	11.017
DDOST	-0.133158	-0.105249	-13.8244	1.07843e-36	2.12847e-34	72.5687
LOC387763	0.133135	0.00115619	5.18171	3.27474e-07	9.62177e-07	5.69384
ANKRD13B	0.133114	0.0993617	12.1028	1.59029e-29	8.52061e-28	56.2173
KLF10	-0.133065	-0.064105	-8.96027	7.72794e-18	8.09717e-17	29.6283
PCK1	0.133015	-0.0243102	3.84733	0.000135965	0.00027823	-0.0608889
FBXO44	0.132999	0.0586359	14.3408	6.36274e-39	1.95346e-36	77.6564
RFWD2	-0.132829	-0.133164	-10.9939	3.6305e-25	9.78009e-24	46.2874
NT5C3	-0.132763	-0.108942	-11.853	1.59533e-28	7.17601e-27	53.9349
C1orf162	0.132738	-0.0489477	5.39481	1.09121e-07	3.40586e-07	6.75476
ALLC	0.132687	0.00760034	6.36232	4.7376e-10	2.00382e-09	12.0365
KLHL22	-0.132675	-0.115417	-10.2628	2.00447e-22	3.76048e-21	40.0472
MS4A4A	0.132674	-0.0289449	5.2082	2.86232e-07	8.46658e-07	5.82364
ERBB2	0.132673	0.0527727	8.09608	4.94958e-15	3.7193e-14	23.2686
GNAS	-0.132652	-0.14927	-8.84837	1.83093e-17	1.82828e-16	28.7786
RP5-1022P6.2	-0.132564	-0.0822726	-6.97506	1.04792e-11	5.40649e-11	15.7583
CRBN	-0.132538	-0.0858375	-12.069	2.17662e-29	1.14093e-27	55.9065
CDH5	0.132401	0.0394666	7.57982	1.87196e-13	1.18093e-12	19.7014
ROCK2	-0.132385	-0.0973182	-8.79952	2.66176e-17	2.61604e-16	28.41
EMP1	0.132372	-0.148741	3.95883	8.7023e-05	0.000183535	0.359629
HECW2	-0.13235	-0.118767	-9.49551	1.12882e-19	1.4873e-18	33.7949
MAN2A1	-0.132345	-0.123593	-7.40052	6.33977e-13	3.78469e-12	18.5052
GAD1	-0.132253	-0.14809	-6.6492	8.23164e-11	3.83008e-10	13.7438
MORF4L2	-0.132224	-0.101842	-9.38407	2.75805e-19	3.47758e-18	32.9138
SMTN	0.132193	0.0498003	8.99039	6.11944e-18	6.52492e-17	29.8582
C11orf68	0.132041	0.0615835	15.477	6.23099e-44	8.60856e-41	89.0927
CHML	-0.131938	-0.097456	-8.04842	6.97327e-15	5.16374e-14	22.9318
C1QB	0.131897	-0.0196147	5.32728	1.55187e-07	4.75467e-07	6.41449
WAS	0.131812	0.0738994	9.57995	5.70971e-20	7.78275e-19	34.4673
RP11-35N6.1	-0.131797	-0.0522917	-8.64534	8.58949e-17	7.94538e-16	27.2564
PLA1A	0.131777	-0.00376073	5.16673	3.53283e-07	1.03392e-06	5.6207
AKAP11	-0.131648	-0.138258	-8.99181	6.05221e-18	6.4568e-17	29.8691
IL4R	0.131523	0.00438488	5.67084	2.49037e-08	8.42848e-08	8.18482
ADAMTS9	0.131522	-0.168511	3.7651	0.000187669	0.000376505	-0.363821
CST3	0.131467	0.16476	7.63229	1.30458e-13	8.39708e-13	20.0557
CD93	0.131441	-0.0427204	5.10347	4.85731e-07	1.39206e-06	5.31389
IQSEC2	0.131434	0.0832111	11.7199	5.39325e-28	2.24336e-26	52.7294
CPLX2	0.131302	0.0846665	13.3782	8.54671e-35	1.17241e-32	68.2354
CHMP2B	-0.131287	-0.0819829	-12.5396	2.66127e-31	1.88551e-29	60.2673
FEM1C	-0.131251	-0.0828882	-8.96122	7.67136e-18	8.05097e-17	29.6355
IRS2	-0.131247	-0.110695	-11.0126	3.08106e-25	8.39349e-24	46.4497
PLXNB3	0.13113	0.0664342	6.27845	7.81122e-10	3.22215e-09	11.5492
ACSF2	0.131121	0.0651845	9.48901	1.18946e-19	1.564e-18	33.7433
NXN	0.131075	0.0578502	7.98875	1.06871e-14	7.75648e-14	22.5122
TMEM30A	-0.131048	-0.0279789	-9.78783	1.04885e-20	1.56173e-19	36.1395
ECHDC1	-0.130961	-0.0976576	-13.4078	6.40949e-35	9.04907e-33	68.5206
AES	0.130928	0.0945432	13.4958	2.7155e-35	4.13569e-33	69.3716
AP1G2	0.130884	0.0481411	9.82916	7.46739e-21	1.13638e-19	36.4748
GPR56	0.130874	0.0389783	8.49497	2.65543e-16	2.32194e-15	26.1455
EGR1	-0.130771	-0.121625	-3.99272	7.58246e-05	0.000161449	0.489682
RPS6KA3	-0.130748	-0.108627	-11.0922	1.5244e-25	4.36813e-24	47.1455
DKK3	-0.130735	-0.0547438	-9.84702	6.44653e-21	9.91167e-20	36.6199
LRRC32	0.130734	0.0498037	5.8912	7.33349e-09	2.64717e-08	9.37098
TMTC4	-0.130733	-0.131764	-8.64917	8.34447e-17	7.73352e-16	27.2849
AOC2	0.130607	0.0338863	11.0427	2.36139e-25	6.55295e-24	46.7127
CSTA	0.130599	-0.0314648	5.95172	5.20721e-09	1.91474e-08	9.70359
SERPINI2	-0.130594	-0.0757925	-9.24671	8.2165e-19	9.73796e-18	31.8373
VAT1	0.13057	0.0471312	9.94308	2.91426e-21	4.67333e-20	37.4037
FBXW7	-0.130511	-0.149018	-6.70064	5.97595e-11	2.83788e-10	14.0566
MDGA1	0.130356	0.0988894	9.35825	3.389e-19	4.22631e-18	32.7106
IFI6	0.130353	0.120054	11.5544	2.42879e-27	9.2113e-26	51.2403
PSMD14	-0.130305	-0.124281	-11.7044	6.21628e-28	2.57463e-26	52.5888
NAP1L5	-0.130234	-0.145202	-5.55809	4.58688e-08	1.4994e-07	7.59315
C18orf51	-0.130151	-0.0494335	-8.52536	2.11624e-16	1.87419e-15	26.3689
IL4	0.130109	0.0564165	7.93298	1.58963e-14	1.13289e-13	22.1222
GIT1	0.130074	0.120697	11.8957	1.07738e-28	5.02138e-27	54.3234
POLR2K	-0.12996	-0.0763446	-10.5125	2.38902e-23	5.02266e-22	42.1488
IL18RAP	0.129865	-0.0135506	5.04658	6.44978e-07	1.81854e-06	5.04085
PDGFRB	0.129826	0.112126	8.62816	9.77878e-17	9.00243e-16	27.1288
GEM	0.129784	-0.086208	4.38807	1.4144e-05	3.33548e-05	2.0828
NWD1	0.129773	0.0975273	5.69987	2.12454e-08	7.26021e-08	8.33883
LOC729051	-0.129765	-0.0829595	-9.33869	3.96038e-19	4.90407e-18	32.557
USP12	-0.129725	-0.0964956	-8.39916	5.41084e-16	4.56019e-15	25.4452
SGK2	-0.129673	-0.0872918	-6.8066	3.07109e-11	1.50611e-10	14.707
GNB5	-0.129531	-0.140718	-7.64843	1.16702e-13	7.54936e-13	20.165
MOBKL3	-0.129504	-0.139835	-8.58688	1.33424e-16	1.20762e-15	26.8229
FGF14	-0.129437	-0.16905	-7.02935	7.37853e-12	3.87919e-11	16.1015
RNASEH1	-0.12924	-0.110448	-14.8936	2.41525e-41	1.66842e-38	83.1826
RCN2	-0.12923	-0.114375	-10.0853	8.91653e-22	1.52758e-20	38.5731
PTBP1	0.129189	0.0496472	8.47799	3.01357e-16	2.61853e-15	26.021
SRGN	0.129047	-0.0250745	4.51875	7.88707e-06	1.91977e-05	2.63985
CEBPB	0.128952	0.0402101	6.89283	1.77569e-11	8.96511e-11	15.2425
NFKBIA	0.128944	0.00574703	5.80729	1.17337e-08	4.13319e-08	8.91468
GLI1	0.128858	0.0618876	7.90464	1.94346e-14	1.37191e-13	21.9248
TYRO3P	-0.128758	-0.104105	-9.35963	3.3521e-19	4.18569e-18	32.7214
RBM13	-0.128731	0.0367871	-5.68363	2.32215e-08	7.89506e-08	8.25261
SECTM1	0.128707	-0.0944543	4.60346	5.36021e-06	1.33777e-05	3.00892
LRRC4	-0.128593	-0.068313	-7.96149	1.29798e-14	9.33985e-14	22.3213
C14orf129	-0.12851	-0.100526	-8.28506	1.2536e-15	1.01283e-14	24.6188
TSPAN3	-0.128429	-0.0892349	-12.3933	1.0555e-30	6.80517e-29	58.9029
COL8A2	0.128374	-0.0127304	5.71606	1.94375e-08	6.67189e-08	8.42506
CHI3L1	0.128367	-0.235608	3.64202	0.000300716	0.000586572	-0.8057
ARIH1	-0.128361	-0.131712	-10.1212	6.59957e-22	1.14641e-20	38.8702
MACROD1	0.128358	0.00206674	13.1238	1.00636e-33	1.08733e-31	65.7921
KLF2	0.128237	0.0795835	5.79785	1.23661e-08	4.34725e-08	8.86374
ADRBK1	0.128168	0.168127	12.0969	1.67982e-29	8.95069e-28	56.163
NBPF14	-0.128142	-0.0782278	-8.9512	8.29006e-18	8.64401e-17	29.5591
ARF6	-0.128062	-0.100766	-10.3478	9.7443e-23	1.92125e-21	40.7598
LOC730607///LOC729231	0.128013	0.0867673	10.2377	2.4773e-22	4.58525e-21	39.838
C19orf59	0.128011	0.0104745	4.58277	5.8938e-06	1.46376e-05	2.91819
C5orf22	-0.127985	-0.108471	-9.42261	2.0267e-19	2.58238e-18	33.2176
IRX3	0.127849	0.0764793	5.20549	2.90202e-07	8.57614e-07	5.81036
SNCG	0.127843	-0.000271125	6.09888	2.23826e-09	8.66369e-09	10.5245
GNAQ	-0.127799	-0.0967973	-7.84889	2.88119e-14	1.9899e-13	21.5381
PPM1E	-0.12776	-0.194138	-5.76738	1.46444e-08	5.10457e-08	8.69967
PCTK1	0.127741	0.0721501	9.20602	1.1329e-18	1.32723e-17	31.5206
LGR5	-0.127734	-0.0767052	-6.60987	1.05018e-10	4.8237e-10	13.506
PGK1	-0.127684	-0.0963971	-8.90257	1.20678e-17	1.23559e-16	29.1892
LDB3	-0.127616	-0.0949345	-7.09749	4.73638e-12	2.53981e-11	16.5354
JUN	0.127567	0.0664129	7.44257	4.77186e-13	2.8861e-12	18.7837
APLP1	0.127557	0.0384754	9.22538	9.72451e-19	1.1448e-17	31.6712
DRD1	-0.127464	-0.216908	-5.90023	6.96941e-09	2.52628e-08	9.42043
NOVA2	0.127414	0.112682	12.6229	1.21014e-31	9.17903e-30	61.0478
C20orf103	-0.127353	-0.213148	-4.96973	9.42054e-07	2.59487e-06	4.67638
HSF1	0.1273	0.0285463	12.493	4.13357e-31	2.83516e-29	59.8312
CNOT3	0.127121	0.174143	11.4786	4.81875e-27	1.75526e-25	50.5624
CLUL1	-0.127049	-0.167941	-5.00501	7.92123e-07	2.2064e-06	4.8431
THSD7A	-0.127019	-0.0892595	-9.16645	1.54704e-18	1.77794e-17	31.2135
STC1	0.126901	-0.0391992	5.31247	1.67574e-07	5.10993e-07	6.34032
ENOSF1	-0.12679	-0.0895421	-7.292	1.31231e-12	7.47429e-12	17.7923
TBL1XR1	-0.126653	-0.0847001	-10.2956	1.51847e-22	2.9166e-21	40.3215
SERINC3	-0.126598	-0.0994563	-10.2913	1.57445e-22	3.01216e-21	40.2857
NXPH4	0.126574	0.067897	7.328	1.03188e-12	5.97387e-12	18.0278
TMEM16H	0.126504	0.156881	13.0377	2.3067e-33	2.3732e-31	64.9704
SCGN	0.126486	-0.0154316	7.8637	2.59563e-14	1.80463e-13	21.6406
CCDC120	0.126339	0.0600213	12.2565	3.80361e-30	2.22938e-28	57.6336
MICALL2	0.126274	0.00300439	5.69717	2.15622e-08	7.36456e-08	8.32448
PSME4	-0.126262	-0.0961212	-12.7605	3.27623e-32	2.68512e-30	62.3419
SCN1A	0.126198	0.0230076	7.92634	1.66633e-14	1.18363e-13	22.0759
ADH1A	0.126183	-0.0349476	5.62774	3.14905e-08	1.05015e-07	7.95741
UBE1	0.126104	0.0987409	16.0835	1.17794e-46	2.53152e-43	95.312
TM9SF2	-0.126075	-0.0986413	-16.093	1.06697e-46	2.53152e-43	95.4101
CST7	0.126007	0.00527985	6.24468	9.53919e-10	3.89091e-09	11.3546
PCNP	-0.125983	0.022508	-10.7317	3.60062e-24	8.50343e-23	44.0191
FCER1G	0.125949	-0.0186812	5.88182	7.73083e-09	2.7804e-08	9.31973
ARMC5	0.125918	0.0476716	14.1955	2.71713e-38	7.40207e-36	76.2174
NUBPL	-0.125867	-0.079127	-13.4195	5.71683e-35	8.37689e-33	68.6339
NUDT15	-0.125844	-0.099727	-13.2414	3.22819e-34	3.90248e-32	66.9186
FAM3C	-0.125808	-0.120251	-6.47365	2.41969e-10	1.06006e-09	12.6916
SNF1LK	0.125727	0.00875115	5.48999	6.60107e-08	2.12089e-07	7.24082
IGSF8	0.125725	0.0903121	9.67662	2.60425e-20	3.70651e-19	35.2419
PSMB5	-0.125668	-0.07892	-13.055	1.95261e-33	2.0305e-31	65.1355
DLG2	-0.125633	-0.0760544	-9.45862	1.5184e-19	1.97504e-18	33.5025
CXADR	-0.125441	-0.102793	-10.7949	2.07709e-24	5.04936e-23	44.5629
HIGD2A	0.125371	0.097759	13.6943	3.88349e-36	6.82859e-34	71.2989
PAIP2B	-0.125263	-0.0854646	-5.26012	2.19482e-07	6.60016e-07	6.07983
KCNIP4	-0.125185	-0.158481	-6.47129	2.45457e-10	1.07388e-09	12.6776
MDH2	-0.125115	-0.111901	-9.23152	9.26459e-19	1.09199e-17	31.719
RASSF8	0.125102	0.0541952	10.5005	2.64726e-23	5.54148e-22	42.0474
CD4	0.125091	0.0797706	10.7496	3.08204e-24	7.32345e-23	44.1728
GRM3	-0.124923	-0.0481397	-11.2269	4.60531e-26	1.45311e-24	48.3294
LYRM7	-0.124797	-0.0121663	-10.6594	6.73688e-24	1.53661e-22	43.3998
LIMCH1	-0.124712	-0.0827293	-14.3324	6.91777e-39	2.05852e-36	77.5735
GSDMDC1	0.124553	0.0508142	8.19098	2.49067e-15	1.94566e-14	23.9437
ATG12	-0.124516	-0.0974778	-13.5181	2.18411e-35	3.43455e-33	69.5874
RETSAT	-0.124364	-0.0739053	-11.3115	2.16426e-26	7.19264e-25	49.0763
KCTD13	0.124335	0.0980348	11.164	8.06467e-26	2.42216e-24	47.7752
NDUFA9	-0.12432	-0.0845904	-10.9686	4.53865e-25	1.19927e-23	46.0666
IGFBP5	0.124291	0.0614823	8.37537	6.45125e-16	5.39473e-15	25.2722
LOC390205	0.124243	0.090234	10.0187	1.55424e-21	2.57601e-20	38.0244
GRIK5	0.124218	0.0957173	15.252	6.26418e-43	6.37694e-40	86.804
AK1	0.124087	0.0934092	8.17887	2.71956e-15	2.11167e-14	23.8573
EYA2	0.124075	0.0910606	7.68985	8.76001e-14	5.74749e-13	20.4465
LRRC4B	0.123966	0.0525677	10.8574	1.2039e-24	3.0439e-23	45.1021
EPB49	0.123738	0.0978933	10.6218	9.32679e-24	2.07117e-22	43.0783
CSF3R	0.123718	0.0482273	6.80136	3.17438e-11	1.55479e-10	14.6747
CORT	-0.123609	-0.127514	-6.15986	1.56983e-09	6.19793e-09	10.8696
ZFP36L1	0.123574	0.00659811	6.08666	2.4023e-09	9.25236e-09	10.4557
SDAD1	0.123559	0.0803555	9.55763	6.83959e-20	9.24468e-19	34.2892
MEF2A	0.123525	0.0614402	9.90603	3.96059e-21	6.22812e-20	37.1008
RNF208	0.123515	0.0736066	13.9035	4.93594e-37	1.06079e-34	73.3433
TRIM59	-0.123513	-0.0956225	-8.67621	6.80115e-17	6.36112e-16	27.4863
ADO	-0.123419	-0.0923176	-12.1678	8.69328e-30	4.85969e-28	56.8152
SLC2A3P1	-0.123374	-0.0972385	-10.1594	4.79048e-22	8.55563e-21	39.1866
SLAIN1	-0.123321	-0.0715743	-7.3743	7.56407e-13	4.4714e-12	18.3322
GCLC	-0.123295	-0.0995427	-11.2157	5.09131e-26	1.57562e-24	48.2301
PCDHGA2	0.123196	0.138235	13.0131	2.92016e-33	2.88172e-31	64.7367
PPM1H	-0.123059	-0.154896	-8.96082	7.69537e-18	8.07179e-17	29.6325
LOC256273	-0.123046	-0.0848398	-9.84461	6.57554e-21	1.0094e-19	36.6004
SERPINI1	-0.123011	-0.185627	-5.28197	1.96157e-07	5.93101e-07	6.18827
BRMS1L	-0.122994	-0.124056	-9.1513	1.74267e-18	1.98443e-17	31.0961
LOC144097	0.122979	0.107136	12.9992	3.34006e-33	3.19819e-31	64.6036
C4orf34	-0.122928	-0.104986	-13.2935	1.9476e-34	2.46213e-32	67.4193
SMARCE1	-0.122894	-0.080998	-14.9792	1.01304e-41	7.53624e-39	84.0441
SMAD9	0.122848	0.0345115	7.0132	8.19223e-12	4.28255e-11	15.9992
YWHAH	-0.122792	-0.170528	-4.86952	1.53267e-06	4.10366e-06	4.20871
TCN2	0.122668	0.0252606	8.34419	8.11876e-16	6.70509e-15	25.046
CPOX	-0.122663	-0.0939723	-9.67641	2.6086e-20	3.70748e-19	35.2403
MAGEH1	-0.122646	-0.12804	-9.4965	1.11981e-19	1.47644e-18	33.8028
PREP	-0.122627	-0.137527	-7.62675	1.35541e-13	8.69803e-13	20.0182
VPS4B	-0.122623	-0.099679	-7.33431	9.89184e-13	5.74558e-12	18.0692
EPHB6	0.122603	0.0430778	13.1913	5.24193e-34	5.96408e-32	66.4383
TBC1D12	-0.122602	-0.0966714	-9.88156	4.84823e-21	7.56246e-20	36.9012
COL18A1	0.122567	0.0422355	7.50194	3.18849e-13	1.96783e-12	19.1791
GDI1	0.122542	0.163904	10.5652	1.51819e-23	3.27003e-22	42.5968
FAM21A	-0.122503	-0.119719	-12.0466	2.67811e-29	1.37401e-27	55.7013
C16orf80	-0.1225	-0.101426	-10.3006	1.45561e-22	2.79866e-21	40.3633
C6orf105	-0.122443	-0.15962	-5.07126	5.70509e-07	1.61848e-06	5.15897
TMCC1	-0.122305	-0.106703	-12.0318	3.06939e-29	1.56644e-27	55.5663
CLIP3	0.122208	0.0624286	11.251	3.71673e-26	1.18433e-24	48.5414
TMEM58	0.122135	0.0969312	9.80273	9.28008e-21	1.38928e-19	36.2603
ADM	0.122064	-0.0308704	3.78782	0.000171779	0.000346207	-0.280732
MRPS23	-0.122019	-0.0714762	-10.6861	5.34558e-24	1.24123e-22	43.6285
RAB28	-0.121968	-0.0430593	-12.1462	1.06231e-29	5.85389e-28	56.6167
GPD1	-0.121902	-0.100995	-8.33088	8.95472e-16	7.37031e-15	24.9496
SNX3	-0.121886	-0.0606103	-11.562	2.268e-27	8.65241e-26	51.308
SCG3	-0.121871	-0.0832121	-6.16106	1.55884e-09	6.15832e-09	10.8765
FA2H	-0.121586	-0.103659	-5.30556	1.7367e-07	5.28331e-07	6.30582
TUBGCP4	-0.121521	-0.0791709	-10.7757	2.45511e-24	5.89165e-23	44.3976
JUND	0.121406	0.115495	11.0763	1.75421e-25	4.98082e-24	47.0067
CRB2	0.121405	0.047239	5.99148	4.15197e-09	1.54526e-08	9.92367
TGFBI	0.121366	-0.00236787	4.73385	2.92342e-06	7.55072e-06	3.58927
IRF3	0.121346	0.0738993	15.388	1.55491e-43	2.00501e-40	88.1858
KIAA1598	-0.121271	-0.0248214	-8.88471	1.38474e-17	1.40229e-16	29.0537
BTBD1	-0.121246	-0.0850957	-12.3242	2.01893e-30	1.22031e-28	58.2607
KRTAP23-1	0.121031	0.291206	10.1527	5.0665e-22	9.0236e-21	39.1313
HIBCH	-0.120986	-0.0813281	-10.4979	2.70603e-23	5.65226e-22	42.0257
PELP1	0.120959	0.0953839	11.0274	2.70334e-25	7.39577e-24	46.579
ZNF703	0.120953	0.079408	10.4933	2.81656e-23	5.8768e-22	41.9861
CNKSR2	-0.120878	-0.203159	-5.47126	7.29163e-08	2.32807e-07	7.14457
ATG4C	-0.120852	-0.0770058	-10.0236	1.49259e-21	2.48022e-20	38.0643
ANK2	-0.120825	-0.117877	-10.586	1.26984e-23	2.75658e-22	42.7733
UBC	-0.120716	0.0927535	-9.67829	2.56906e-20	3.66181e-19	35.2554
PEX14	0.120675	0.0513995	10.8072	1.86613e-24	4.58054e-23	44.6688
CYB5R2	-0.120638	-0.0936938	-6.55347	1.48617e-10	6.68655e-10	13.1671
GFI1B	0.120572	0.10114	10.5193	2.25386e-23	4.75918e-22	42.2063
BTG2	0.120458	0.0687756	7.16174	3.10881e-12	1.70053e-11	16.9476
CHD3	0.120449	0.0408433	12.9568	5.01507e-33	4.66353e-31	64.201
LRRTM2	-0.120442	-0.14917	-7.89923	2.01925e-14	1.42126e-13	21.8872
CBR1	-0.120398	-0.078802	-8.69337	5.97246e-17	5.61864e-16	27.6142
ARPP-21	-0.120381	-0.157338	-7.00543	8.61432e-12	4.49227e-11	15.95
YWHAB	-0.120329	-0.0992536	-7.34473	9.22489e-13	5.39057e-12	18.1376
FGF7	-0.120308	-0.134765	-6.17242	1.45874e-09	5.796e-09	10.9411
SH3TC2	-0.120244	-0.0772917	-8.84888	1.82378e-17	1.82208e-16	28.7824
RAPGEF4	-0.120221	-0.0800503	-7.38192	7.18615e-13	4.25971e-12	18.3824
TYMS	-0.120216	-0.0860248	-6.36864	4.56142e-10	1.93438e-09	12.0734
KIAA1303	0.120201	0.0105102	11.2999	2.4007e-26	7.88358e-25	48.9738
C9orf4	-0.120154	-0.156548	-6.42098	3.3289e-10	1.43306e-09	12.3805
APPBP1	-0.120144	-0.106657	-12.3219	2.06237e-30	1.24269e-28	58.2396
CCNI	-0.120137	0.0403851	-9.4993	1.0949e-19	1.44458e-18	33.825
TUBA1A	-0.120109	-0.0734071	-7.75869	5.42475e-14	3.62938e-13	20.9169
CXCL2	0.120047	0.0421737	4.86188	1.59003e-06	4.24843e-06	4.17343
ERAL1	0.120033	0.0699923	15.0621	4.35268e-42	3.66041e-39	84.8817
KNDC1	0.119963	0.0711436	10.5764	1.37883e-23	2.98315e-22	42.692
TLR2	0.119936	-0.104611	3.89956	0.000110464	0.000229446	0.134699
SPG3A	-0.119878	-0.118777	-6.14911	1.67146e-09	6.56834e-09	10.8086
PAN3///NLRP6	-0.119826	0.0467961	-11.0334	2.56296e-25	7.05161e-24	46.6317
RAB12	-0.119748	-0.0598097	-6.90456	1.64757e-11	8.34443e-11	15.3158
DNAJB4	-0.119733	-0.104411	-6.71812	5.35758e-11	2.55678e-10	14.1633
FLJ13137	0.119696	0.0218807	9.99686	1.86446e-21	3.06393e-20	37.8447
ENC1	-0.119612	-0.195967	-4.58339	5.87701e-06	1.45997e-05	2.92091
FEZ1	-0.119583	-0.045147	-13.8663	7.13148e-37	1.46981e-34	72.9786
FAM46B	0.119436	0.0103112	7.17594	2.83149e-12	1.55543e-11	17.039
PTBP2	-0.119387	-0.0679611	-12.8244	1.7811e-32	1.51096e-30	62.9456
GTF3C4	-0.119383	-0.0942187	-9.45615	1.54884e-19	2.01059e-18	33.4829
PDE1A	-0.119359	-0.153521	-5.86711	8.39723e-09	3.00944e-08	9.23945
SYNJ1	-0.119222	-0.106973	-7.04093	6.84471e-12	3.60835e-11	16.175
KIAA0256	-0.119174	-0.0556677	-11.9414	7.07315e-29	3.42022e-27	54.7399
SLC39A6	-0.119103	-0.0472171	-14.3859	4.05121e-39	1.39926e-36	78.104
PLCD4	0.119091	0.0281771	11.8307	1.95744e-28	8.64402e-27	53.7324
LOC643338	0.119086	0.00467888	7.34264	9.35468e-13	5.45817e-12	18.1239
GNG11	0.119041	0.0840649	7.8867	2.20644e-14	1.54514e-13	21.8002
H3F3B	-0.118929	-0.101566	-8.95863	7.82699e-18	8.18322e-17	29.6158
RELL1	0.118901	-0.0201304	5.80936	1.15992e-08	4.08804e-08	8.92587
LOC400642	-0.118884	-0.104063	-9.99549	1.88588e-21	3.09125e-20	37.8334
EDN1	0.118813	-0.0404914	4.57553	6.09209e-06	1.5101e-05	2.88656
LOC400120	-0.118795	-0.215721	-4.00579	7.18828e-05	0.000153597	0.540114
RSPH3	-0.118778	-0.0324918	-9.88133	4.85728e-21	7.57047e-20	36.8993
NDUFV1	-0.118764	-0.117944	-9.92807	3.30011e-21	5.23203e-20	37.2809
CD151	0.118689	0.0776354	10.4101	5.73548e-23	1.16652e-21	41.2834
DBN1	0.11862	0.071627	12.8791	1.05623e-32	9.32854e-31	63.4632
HEYL	0.118618	0.0318282	6.46839	2.49819e-10	1.09173e-09	12.6604
EGR3	-0.118542	-0.129436	-5.49828	6.3163e-08	2.03344e-07	7.28349
ANXA2	0.118539	-0.0432119	4.10732	4.72464e-05	0.000103575	0.937095
TNFRSF10B	0.118518	0.0129595	6.15708	1.59554e-09	6.29558e-09	10.8538
ITIH2	0.118497	0.012494	4.1703	3.62571e-05	8.07745e-05	1.188
VAMP3	-0.118483	-0.0718307	-7.21142	2.24054e-12	1.24423e-11	17.2683
FAM107A	0.118462	0.104653	4.8222	1.92313e-06	5.08714e-06	3.99087
MYH9	0.118459	0.0467144	9.08234	2.99077e-18	3.33223e-17	30.5638
TFF1	0.118451	0.0878641	10.3899	6.81314e-23	1.37557e-21	41.1133
RUVBL1	-0.118335	-0.136012	-13.5717	1.29324e-35	2.08448e-33	70.1067
SNAP91	-0.11825	-0.161779	-5.24876	2.32655e-07	6.97245e-07	6.02358
LOC128977	-0.11822	-0.0915426	-13.2194	3.99344e-34	4.65308e-32	66.7079
LGMN	-0.118187	-0.111115	-8.70703	5.38464e-17	5.09539e-16	27.7162
UCHL5	-0.118169	-0.105958	-8.36726	6.84902e-16	5.7027e-15	25.2133
SYAP1	-0.118145	0.0171519	-11.1901	6.39513e-26	1.95102e-24	48.0046
SRPX2	0.118127	0.00826652	5.67306	2.46032e-08	8.33551e-08	8.19658
APOA2	0.118099	0.13607	11.1736	7.40704e-26	2.24205e-24	47.8593
NOPE	0.118083	0.0422259	6.62836	9.36664e-11	4.32902e-10	13.6177
FOXO4	0.118041	0.0967626	7.05047	6.43366e-12	3.40185e-11	16.2356
GPRASP1	-0.117875	-0.150042	-6.0939	2.30382e-09	8.90318e-09	10.4964
C4orf27	-0.11778	-0.106627	-9.81295	8.53292e-21	1.28439e-19	36.3431
FLJ22662	0.117727	0.018349	6.55213	1.49843e-10	6.73859e-10	13.1591
CRY1	-0.117712	-0.123258	-11.113	1.26747e-25	3.67547e-24	47.3281
C20orf191	-0.117693	-0.0573038	-13.2419	3.21162e-34	3.90248e-32	66.9237
ENDOGL1	-0.117667	-0.0446187	-13.6477	6.1414e-36	1.0606e-33	70.8447
GRID2IP	0.117542	0.167695	7.98225	1.11951e-14	8.10689e-14	22.4666
ZC3H8	-0.117508	-0.0996977	-12.587	1.70043e-31	1.25056e-29	60.7109
DIXDC1	-0.117495	-0.0929931	-11.5328	2.95236e-27	1.10724e-25	51.0471
C2orf25	-0.117459	-0.0893419	-12.8581	1.29047e-32	1.1143e-30	63.2647
POU2F2	0.117445	0.0446817	10.0443	1.25611e-21	2.11451e-20	38.2347
PDHX	-0.117444	-0.111578	-9.81147	8.63692e-21	1.29701e-19	36.3312
TNFRSF10D	0.117429	-0.00978059	4.94673	1.05415e-06	2.88802e-06	4.56829
SLC10A4	-0.11738	-0.143418	-5.39027	1.11751e-07	3.48513e-07	6.73174
TGIF1	0.117332	0.0131502	6.00774	3.78317e-09	1.41427e-08	10.0141
RASD2	0.117314	0.0553402	12.4357	7.08492e-31	4.66111e-29	59.2976
DEFA3	0.117095	-0.435894	2.72577	0.00665574	0.0106287	-3.65373
C11orf46	-0.117086	-0.129719	-8.63347	9.39497e-17	8.66559e-16	27.1682
TMEM63A	-0.117082	-0.0633184	-6.47766	2.36144e-10	1.03595e-09	12.7153
ETV1	-0.117072	-0.0207996	-10.4708	3.41507e-23	7.08738e-22	41.7957
C12orf29	-0.117024	-0.127311	-7.92699	1.65868e-14	1.17863e-13	22.0804
KLF9	-0.117015	-0.117847	-8.20256	2.28946e-15	1.79792e-14	24.0265
SAFB2	0.116997	0.0791411	10.5717	1.43645e-23	3.10433e-22	42.6515
PNMA1	-0.116986	-0.0977202	-8.47477	3.0869e-16	2.67503e-15	25.9974
PLLP	-0.116898	-0.0900999	-6.471	2.45896e-10	1.07556e-09	12.6759
DLEC1	0.116862	0.0284843	5.40474	1.03582e-07	3.2424e-07	6.80511
FCGR2A	0.116814	-0.0731298	4.0845	5.19584e-05	0.00011339	0.847083
FLJ40142	-0.116714	-0.0779184	-11.4455	6.49374e-27	2.30462e-25	50.2672
EIF2S2	-0.116705	-0.0893557	-13.6955	3.84075e-36	6.8154e-34	71.3098
SERPINH1	0.1166	0.00820299	4.68693	3.64199e-06	9.27863e-06	3.37874
PSMC2	-0.116567	-0.0799721	-12.9401	5.88647e-33	5.37057e-31	64.0423
DUSP1	0.116557	0.0357475	4.9329	1.12765e-06	3.07804e-06	4.50351
PRR18	-0.116553	-0.0924601	-5.90198	6.90081e-09	2.50376e-08	9.43004
RBM42	0.116547	0.0311723	11.1136	1.26167e-25	3.66413e-24	47.3326
MYLIP	-0.116481	-0.0780102	-12.8679	1.17562e-32	1.02891e-30	63.3571
FOXF1	0.116475	0.0801267	5.90367	6.83527e-09	2.48324e-08	9.43931
ZNF791	-0.116454	-0.074106	-12.7998	2.25181e-32	1.88548e-30	62.7133
MT1H	0.11644	0.0023428	4.48467	9.19753e-06	2.21985e-05	2.49312
LOC347273	-0.116425	-0.0722783	-11.4621	5.59408e-27	2.01116e-25	50.4148
MAP3K6	0.116358	0.0438005	9.85243	6.16537e-21	9.51721e-20	36.6639
ZNF512	-0.116338	-0.0596529	-12.258	3.74985e-30	2.20455e-28	57.6477
CIDEA	-0.116336	-0.216701	-5.2352	2.49382e-07	7.4357e-07	5.95659
MGC45438	0.116141	0.0833722	10.042	1.28038e-21	2.15162e-20	38.2158
KCNT1	-0.116132	-0.0901127	-6.02685	3.39078e-09	1.27596e-08	10.1205
ZNF75	-0.1161	-0.0890564	-12.1037	1.57635e-29	8.46937e-28	56.226
PTPRA	0.115878	0.0310898	14.4733	1.68409e-39	7.08125e-37	78.9742
KIDINS220	-0.115849	-0.0854824	-14.6871	1.9556e-40	1.0507e-37	81.1089
MCCC1	-0.115827	-0.0778793	-15.2928	4.12729e-43	4.98938e-40	87.2177
CUL7	0.115765	0.0373028	14.787	7.12216e-41	4.44377e-38	82.1103
PRKCSH	0.115679	0.0729583	10.5049	2.55021e-23	5.35572e-22	42.0843
PCDHGA1	0.115649	0.114078	13.1749	6.14004e-34	6.90469e-32	66.2816
OAT	-0.115627	-0.0934545	-9.31251	4.87706e-19	5.93658e-18	32.3516
MLL3	-0.115571	-0.0698401	-7.96516	1.2645e-14	9.11249e-14	22.347
SLC25A18	0.115535	0.0751594	7.09101	4.94119e-12	2.64524e-11	16.4939
PPP2R2A	-0.115469	-0.0867009	-13.409	6.33533e-35	9.01014e-33	68.5321
LRRC49	-0.115437	-0.126605	-7.58907	1.75683e-13	1.11209e-12	19.7637
CCL2	0.115426	-0.194667	3.71986	0.000223518	0.000443732	-0.527844
SLC25A41	0.115377	0.0483555	7.8388	3.09347e-14	2.12554e-13	21.4683
EML3	0.115372	0.0492934	9.04353	4.04837e-18	4.43395e-17	30.2654
EDC3	0.115349	0.0461168	10.6611	6.63869e-24	1.5178e-22	43.4143
NDUFA5	-0.115328	-0.0825103	-7.28232	1.39975e-12	7.95121e-12	17.7291
HCN2	0.115291	0.112844	13.0142	2.88975e-33	2.86634e-31	64.7471
LIG4	-0.11526	-0.0851774	-7.45339	4.43449e-13	2.68878e-12	18.8556
IQCG	-0.115174	-0.0893466	-12.1384	1.14273e-29	6.20864e-28	56.5444
NLGN4X	-0.115126	-0.0865867	-10.2365	2.50255e-22	4.62756e-21	39.828
GPR155	-0.115126	-0.123087	-7.23855	1.87222e-12	1.04873e-11	17.4442
PRIC285	0.115103	0.0827837	7.18066	2.74495e-12	1.50961e-11	17.0694
RNF125	-0.115091	-0.037571	-10.4644	3.6071e-23	7.46188e-22	41.7416
CREBL1	0.115021	0.0595066	9.2682	6.93126e-19	8.26028e-18	32.0051
CHN1	-0.115018	-0.0459733	-5.12118	4.44458e-07	1.28118e-06	5.39944
NRG3	-0.115016	-0.0984322	-7.82748	3.34969e-14	2.29344e-13	21.3902
GPC3	0.115001	0.0692442	7.81196	3.73573e-14	2.54155e-13	21.2831
COPS8	-0.11494	-0.0939227	-9.20847	1.11125e-18	1.30423e-17	31.5397
TMEFF2	-0.114939	-0.0538826	-8.02567	8.20835e-15	6.02985e-14	22.7715
SOX9	0.114933	0.0826123	6.85224	2.29963e-11	1.14255e-10	14.9897
BAT2	0.114924	0.00847462	8.63686	9.15728e-17	8.45845e-16	27.1934
GNG13	0.114908	0.0675767	9.6059	4.62739e-20	6.39308e-19	34.6747
MPZL2	0.114897	0.00883857	6.31601	6.24831e-10	2.61026e-09	11.7667
SLC44A2	0.114832	0.0814403	8.76937	3.35076e-17	3.25844e-16	28.1833
MST150	0.114795	0.0177907	6.08407	2.43858e-09	9.37901e-09	10.4411
SFMBT2	-0.11477	-0.0481129	-8.38675	5.93083e-16	4.97028e-15	25.3549
CPVL	0.114744	-0.0516298	4.96119	9.82266e-07	2.6991e-06	4.63619
LPGAT1	-0.114725	-0.10042	-12.0017	4.0565e-29	2.03794e-27	55.2903
GRIA1	-0.114717	-0.106799	-5.68723	2.27682e-08	7.75183e-08	8.27172
CPXM1	0.11463	0.0413015	6.48542	2.25258e-10	9.90438e-10	12.7614
ACTG1	-0.114627	-0.049067	-7.79711	4.14582e-14	2.80477e-13	21.1808
PRKCG	0.114572	0.0584291	8.76043	3.58727e-17	3.4762e-16	28.1162
LGI4	0.114551	0.0384185	7.82974	3.29705e-14	2.2606e-13	21.4057
PPP2CB	-0.114526	-0.0322037	-11.9355	7.468e-29	3.58427e-27	54.6862
DYNC1LI2	-0.114498	-0.0287343	-11.4459	6.47007e-27	2.30044e-25	50.2708
ACVR1C	-0.114496	-0.10108	-7.84824	2.89436e-14	1.99795e-13	21.5336
NPY	-0.11449	-0.170048	-5.25214	2.28664e-07	6.85921e-07	6.04028
MYC	0.114459	0.0031528	6.57585	1.29522e-10	5.88631e-10	13.3013
FRZB	0.11444	0.012511	4.36212	1.58563e-05	3.71973e-05	1.97397
LHCGR	0.114366	0.0297214	5.64112	2.92821e-08	9.81585e-08	8.02786
SEMA3E	-0.11436	-0.150558	-5.9798	4.43799e-09	1.64318e-08	9.85892
MICB	0.114353	0.048212	6.78404	3.54104e-11	1.72565e-10	14.5678
TMEM145	0.114276	0.0621045	13.5127	2.30243e-35	3.59142e-33	69.5351
PCDHGB5	0.114265	0.115678	13.7097	3.33777e-36	5.97771e-34	71.4489
PRKCQ	-0.114231	-0.0753995	-10.4382	4.51368e-23	9.2392e-22	41.5201
TXNDC10	-0.114184	-0.0852971	-9.77104	1.20374e-20	1.77731e-19	36.0035
IL10RA	0.114174	0.0252735	6.14271	1.735e-09	6.80695e-09	10.7723
CES2	0.114112	0.0673667	8.02063	8.50992e-15	6.2419e-14	22.7361
C21orf91	-0.114108	-0.0821586	-7.82234	3.47298e-14	2.37449e-13	21.3547
AQR	-0.114101	-0.0921786	-12.8156	1.93718e-32	1.6362e-30	62.8624
TIMM8A	-0.114054	-0.0715235	-8.11177	4.42008e-15	3.33958e-14	23.3798
POU3F1	0.114046	0.110404	8.53329	1.99436e-16	1.77112e-15	26.4273
ABHD12B	-0.113955	-0.0834924	-6.59035	1.18456e-10	5.41009e-10	13.3885
CTSL2	-0.113931	-0.111205	-5.94229	5.49363e-09	2.0136e-08	9.65157
STS-1	-0.113927	-0.128744	-6.85099	2.3179e-11	1.15133e-10	14.982
CADM3	0.113909	0.0770544	14.4934	1.37612e-39	6.18997e-37	79.1744
SLC26A2	0.11389	0.0462362	5.56531	4.41237e-08	1.44529e-07	7.63071
MGC2889	-0.113889	-0.101259	-5.75638	1.55633e-08	5.40634e-08	8.64064
PTGES3	-0.113885	-0.0842947	-10.1863	3.82186e-22	6.89574e-21	39.4098
ACSL3	-0.11388	-0.0704829	-11.0696	1.86272e-25	5.24436e-24	46.9473
FAIM2	-0.113855	-0.131109	-6.46497	2.55059e-10	1.11312e-09	12.6402
PDE4B	-0.113847	-0.106082	-10.5641	1.53321e-23	3.2987e-22	42.5871
PARP1	-0.113755	-0.0439704	-15.8043	2.1312e-45	3.43514e-42	92.4402
ENOPH1	-0.113677	-0.0691457	-11.6716	8.38148e-28	3.41294e-26	52.2931
CRYBB2	-0.113629	-0.124574	-4.57834	6.01429e-06	1.49235e-05	2.89884
SNORD116@	0.113597	0.116836	10.3438	1.0087e-22	1.98275e-21	40.7256
LOC388272	-0.113568	-0.0916622	-9.90633	3.95081e-21	6.21778e-20	37.1033
B3GALNT1	-0.113558	-0.104289	-7.58018	1.86738e-13	1.17843e-12	19.7038
OSGEPL1	-0.113553	-0.0890898	-11.572	2.0704e-27	7.94557e-26	51.3982
EIF4E	-0.113545	-0.0809283	-9.38584	2.7194e-19	3.43109e-18	32.9277
ZNF439	-0.113477	-0.0656181	-13.6282	7.43425e-36	1.229e-33	70.6553
ANKRD25	0.113417	0.0349227	5.72251	1.87602e-08	6.45544e-08	8.45945
MRPS30	-0.113412	-0.116368	-8.55035	1.75515e-16	1.56804e-15	26.553
TRPC3	-0.113348	-0.088152	-7.32711	1.03804e-12	6.00234e-12	18.022
IL1R1	0.113258	-0.0224192	5.56382	4.44775e-08	1.45589e-07	7.62298
KIAA0492	-0.113249	-0.0464292	-10.1225	6.53097e-22	1.13701e-20	38.8806
GATAD2B	0.113212	0.0887084	11.3028	2.33916e-26	7.73402e-25	48.9994
TMEM132A	0.113174	0.0878656	11.1564	8.6263e-26	2.58282e-24	47.7086
FXR2	0.113144	0.0700857	12.4692	5.16979e-31	3.47202e-29	59.6097
ELOVL1	-0.113108	-0.036673	-7.0628	5.93812e-12	3.1501e-11	16.3141
WDR23	-0.11298	-0.0829652	-13.0013	3.27172e-33	3.16408e-31	64.6241
CYP3A5	0.112901	0.0328155	7.37097	7.7349e-13	4.56481e-12	18.3103
CRLS1	-0.112899	-0.0857945	-11.5325	2.96146e-27	1.10794e-25	51.0441
SNAP25	-0.112801	0.0948464	-4.07801	5.33779e-05	0.000116213	0.821573
POU3F2	0.112735	0.0538488	7.56637	2.05297e-13	1.2884e-12	19.6109
LOC440061	0.112734	0.00793255	5.9032	6.85366e-09	2.48945e-08	9.4367
RAB3B	-0.112711	-0.189106	-4.86257	1.58483e-06	4.23569e-06	4.17658
LOC162073	0.11261	0.0421283	7.33708	9.70992e-13	5.645e-12	18.0874
YPEL3	0.112595	0.120405	15.6537	1.01003e-44	1.50277e-41	90.8971
KIAA1430	-0.112582	-0.0849266	-10.6823	5.5268e-24	1.28023e-22	43.5955
SLC25A27	-0.112558	-0.125581	-7.6397	1.23957e-13	7.98659e-13	20.1058
CABIN1	0.112554	0.0945148	12.9543	5.13659e-33	4.75182e-31	64.1773
MECP2	0.112542	0.0786257	13.0514	2.02149e-33	2.09089e-31	65.1011
LYSMD3	-0.112472	-0.0738784	-7.73907	6.22073e-14	4.14187e-13	20.7825
C2orf29	-0.112466	-0.0891748	-14.4885	1.44572e-39	6.35527e-37	79.1255
C15orf23	-0.112442	-0.135178	-7.91379	1.82144e-14	1.29001e-13	21.9885
FLJ12993	-0.112307	-0.0918341	-10.0471	1.22665e-21	2.06852e-20	38.2581
ANAPC7	-0.112307	-0.0928544	-13.1947	5.0727e-34	5.80569e-32	66.4708
C17orf80	-0.112304	-0.0799436	-11.9723	5.31855e-29	2.63773e-27	55.0221
PPP1R14BP1	0.112251	0.0525398	7.99067	1.05417e-14	7.65669e-14	22.5257
CD14	0.112234	-0.103934	4.24232	2.66763e-05	6.06172e-05	1.47925
VAMP8	0.112213	0.00176753	6.19061	1.31126e-09	5.24776e-09	11.0448
ARHGDIA	0.112178	0.0443628	10.2742	1.8198e-22	3.42731e-21	40.1427
TCF7L1	0.112134	0.0687679	8.36111	7.16673e-16	5.95186e-15	25.1687
AOC3	0.112108	0.0254146	5.61748	3.32918e-08	1.10679e-07	7.90352
NR3C1	-0.112092	-0.0919334	-9.33144	4.1958e-19	5.17576e-18	32.5
ACADL	0.112085	0.0274552	6.30033	6.8596e-10	2.85023e-09	11.6758
HNRNPU	-0.112083	-0.0671676	-10.8696	1.08168e-24	2.76015e-23	45.2079
H2AFZP2	-0.112061	-0.103546	-8.75559	3.72193e-17	3.59768e-16	28.0799
LCP1	0.11203	-0.0581809	3.99306	7.57203e-05	0.000161244	0.490982
IL15RA	0.112004	0.000381135	6.05979	2.80551e-09	1.06819e-08	10.3048
KLHL23	-0.111952	-0.0584179	-11.246	3.88673e-26	1.23444e-24	48.4972
GLT6D1	0.111945	0.115844	11.4221	8.01926e-27	2.82015e-25	50.0585
SUMO4	-0.111921	-0.0186869	-11.3446	1.60869e-26	5.43024e-25	49.3698
EEF1E1	-0.111823	-0.103591	-9.1513	1.74264e-18	1.98443e-17	31.0961
TCF7	0.11176	0.100551	7.46804	4.01513e-13	2.4437e-12	18.953
MINK1	0.111652	0.0902776	11.3033	2.32959e-26	7.71556e-25	49.0035
ORAI1	0.11165	0.0514598	8.69928	5.7104e-17	5.38258e-16	27.6584
SLC35E3	-0.111634	-0.067719	-11.9426	6.999e-29	3.39285e-27	54.7504
RPL6	-0.111617	-0.00924825	-12.4709	5.08781e-31	3.42887e-29	59.6255
C14orf43	0.111583	0.104596	10.927	6.54181e-25	1.6916e-23	45.7052
LOC284276	0.111526	0.02737	7.32036	1.08594e-12	6.25688e-12	17.9778
SELL	0.111522	-0.00408457	4.77488	2.40861e-06	6.28709e-06	3.77495
FSTL1	0.111469	0.0161719	6.03945	3.15403e-09	1.19407e-08	10.1909
SFTPB	0.111349	0.0739587	11.8215	2.13001e-28	9.36335e-27	53.6488
C2orf40	0.111283	0.0287489	5.63126	3.08949e-08	1.03207e-07	7.97591
CDH2	-0.111244	-0.0908963	-9.55253	7.12728e-20	9.62009e-19	34.2485
IGFBP2	0.111158	0.0292256	6.76734	3.93392e-11	1.90988e-10	14.465
PEG10	0.111126	0.0588988	13.3581	1.03927e-34	1.38996e-32	68.0416
SLC7A11	0.11109	0.0828023	7.79963	4.07328e-14	2.75859e-13	21.1981
LOC728535///LOC653391///LOC653080	-0.111058	-0.0930932	-6.82265	2.77453e-11	1.36691e-10	14.8062
PCDHGB6	0.111056	0.114706	12.9326	6.32399e-33	5.71582e-31	63.9713
SERPINA1	0.11097	-0.0127443	6.54783	1.53846e-10	6.90256e-10	13.1334
ACBD7	-0.110954	-0.0300715	-6.44808	2.82578e-10	1.22768e-09	12.5402
SLC25A13	-0.110948	-0.0745109	-9.09389	2.73261e-18	3.05339e-17	30.6527
DCLK1	-0.110901	-0.170102	-4.32699	1.84926e-05	4.2929e-05	1.82757
RUNX1	0.110845	-0.0121844	5.53876	5.0882e-08	1.656e-07	7.49274
ENG	0.11083	0.0187448	7.65498	1.11532e-13	7.22214e-13	20.2095
LYG2	0.110783	0.102274	5.96616	4.79679e-09	1.76993e-08	9.78337
CTSZ	0.110762	0.0369223	8.7025	5.5727e-17	5.26819e-16	27.6824
CDK5R2	-0.110717	-0.102426	-5.34195	1.43807e-07	4.42141e-07	6.48805
C6orf120	-0.110708	-0.0946269	-11.8553	1.56231e-28	7.04385e-27	53.9556
KIT	-0.110702	-0.070911	-6.26377	8.52098e-10	3.49995e-09	11.4645
PLDN	-0.110697	-0.113494	-10.0812	9.22947e-22	1.57561e-20	38.539
ENPP4	-0.110696	-0.101391	-9.36331	3.25499e-19	4.06969e-18	32.7504
SC4MOL	-0.110672	-0.131377	-6.19595	1.27087e-09	5.09773e-09	11.0753
SPCS2	-0.11064	-0.0512101	-14.965	1.17028e-41	8.38355e-39	83.901
MBOAT2	-0.110625	-0.0696895	-12.9659	4.59516e-33	4.31454e-31	64.2876
PCDHGB3	0.11055	0.145345	10.1078	7.38322e-22	1.27052e-20	38.7594
ZFPM1	0.110534	0.0702291	12.456	5.85599e-31	3.90575e-29	59.4863
STEAP4	0.110531	-0.00831908	5.66144	2.62145e-08	8.84415e-08	8.1351
CDC42SE2	-0.110435	-0.109902	-8.02552	8.21701e-15	6.03392e-14	22.7705
PBXIP1	0.110432	0.0850662	9.04978	3.8559e-18	4.23754e-17	30.3134
NXPH1	-0.110424	-0.0442904	-5.33485	1.49208e-07	4.57781e-07	6.45243
SNURF	-0.110415	-0.0635588	-7.41682	5.6796e-13	3.41164e-12	18.613
KIAA0265	-0.110415	-0.112381	-5.76168	1.5114e-08	5.25784e-08	8.66905
DMBT1	-0.110387	-0.13251	-5.03147	6.95101e-07	1.95133e-06	4.96882
MED4	-0.110244	-0.0747082	-13.3183	1.53107e-34	2.00094e-32	67.6577
PRTFDC1	-0.110141	-0.0654901	-8.77558	3.19571e-17	3.11707e-16	28.23
SCRN1	-0.110127	-0.0229653	-13.9994	1.91046e-37	4.39905e-35	74.2841
OLFM3	-0.110126	-0.174869	-4.00009	7.35765e-05	0.000156921	0.518112
SAR1B	-0.110087	-0.0708374	-9.59318	5.12985e-20	7.05199e-19	34.573
PSMB1	-0.110073	-0.0563852	-14.3749	4.52343e-39	1.45576e-36	77.9947
FAM129A	0.110068	0.0250344	6.06641	2.70049e-09	1.03186e-08	10.3419
MRC1	0.110054	-0.0436978	3.41983	0.000681439	0.00126382	-1.56821
PCDHGB1	0.110017	0.126697	13.2525	2.89692e-34	3.59148e-32	67.0259
GUF1	-0.110002	-0.109999	-7.97374	1.18947e-14	8.59425e-14	22.4071
PPIF	-0.109964	-0.0976025	-10.2891	1.60382e-22	3.05927e-21	40.2675
GLCE	-0.109891	-0.100252	-9.08807	2.85987e-18	3.18821e-17	30.6079
SULT1B1	0.109867	-0.0308395	5.89356	7.23659e-09	2.6148e-08	9.38389
RNASE2	0.10969	-0.132547	3.77165	0.000182953	0.000367616	-0.339925
MSX2	0.109659	0.0449704	5.88007	7.80771e-09	2.80596e-08	9.31013
CD24	-0.109633	-0.0674212	-6.73354	4.8644e-11	2.33351e-10	14.2576
TCHP	-0.109601	-0.0613041	-13.4347	4.93256e-35	7.28286e-33	68.7801
NR2F1	0.109594	0.0642777	9.71427	1.91557e-20	2.77535e-19	35.545
LOC126520	0.109579	0.0340836	6.88217	1.90068e-11	9.55625e-11	15.176
HMGN2	-0.10957	-0.0455779	-8.66053	7.65818e-17	7.13509e-16	27.3694
SCD	-0.109563	-0.085214	-8.10714	4.57029e-15	3.44768e-14	23.347
GDAP1	-0.109556	-0.164306	-5.63593	3.01209e-08	1.00743e-07	8.00049
IQWD1	-0.109542	-0.110757	-7.54863	2.31812e-13	1.44823e-12	19.4917
NCALD	-0.109498	-0.118308	-4.60478	5.32759e-06	1.32997e-05	3.01476
RANBP3L	0.10949	0.038456	4.74395	2.78765e-06	7.21611e-06	3.63485
SYTL4	0.109393	0.0217224	5.78326	1.34104e-08	4.69643e-08	8.78508
CLGN	-0.109384	-0.0907725	-5.95704	5.05221e-09	1.86027e-08	9.73295
DGKZ	0.109377	0.0749839	7.63165	1.31038e-13	8.42599e-13	20.0513
FMNL1	0.109357	0.0784309	10.2771	1.77492e-22	3.35258e-21	40.1674
PCDHGA6	0.109343	0.114723	13.3609	1.01197e-34	1.36878e-32	68.068
GABRA6	-0.109323	-0.0593848	-6.87016	2.05189e-11	1.02711e-10	15.1012
CYBRD1	0.10922	0.0584982	5.50097	6.22651e-08	2.00588e-07	7.29734
SMC2	-0.109176	-0.0901689	-8.69831	5.75289e-17	5.41999e-16	27.6511
ZNF705A	-0.109176	0.0170408	-11.581	1.90938e-27	7.38625e-26	51.4783
GGH	-0.109153	-0.111536	-7.64823	1.16862e-13	7.55715e-13	20.1637
MORF4L1	-0.109149	-0.0784835	-11.1382	1.01429e-25	2.99061e-24	47.5485
SERTAD3	0.109089	0.0328481	8.35476	7.51067e-16	6.22148e-15	25.1226
C21orf131	-0.109081	-0.0844607	-5.62141	3.259e-08	1.08451e-07	7.92416
ELMOD1	-0.109047	-0.167656	-4.38807	1.41441e-05	3.33548e-05	2.08279
NYD-SP21	0.10897	-0.00445134	4.84618	1.71461e-06	4.56552e-06	4.10102
CCDC88B	0.108924	0.0223411	7.40276	6.24455e-13	3.7313e-12	18.5201
DYNC1I1	-0.108916	-0.194084	-4.20336	3.15102e-05	7.08111e-05	1.32113
RASGEF1C	0.108901	0.038391	7.77084	4.98312e-14	3.34898e-13	21.0002
COL4A2	0.10886	0.0321273	9.7674	1.24012e-20	1.82823e-19	35.9741
RAB40B	-0.108859	-0.0392661	-12.3719	1.2913e-30	8.18896e-29	58.7032
CSNK2A1	-0.108853	-0.0938212	-12.6058	1.42374e-31	1.06737e-29	60.8868
SUPT5H	0.108832	0.0695936	12.1592	9.41764e-30	5.21937e-28	56.7359
HSF2	-0.10883	-0.101394	-9.17657	1.42868e-18	1.65372e-17	31.292
DGKG	0.108799	0.0470023	7.41505	5.74775e-13	3.44615e-12	18.6013
C1orf80	-0.108791	-0.0805486	-8.61666	1.06641e-16	9.76169e-16	27.0435
S100P	0.108745	0.0465102	7.11107	4.33427e-12	2.33454e-11	16.6222
RPL36	0.108713	0.0586967	12.3704	1.30891e-30	8.22213e-29	58.6898
DEPDC7	-0.108707	-0.0468473	-8.22129	1.99765e-15	1.58031e-14	24.1606
HIF3A	0.108702	0.0583797	7.33277	9.99401e-13	5.79449e-12	18.0592
HAPLN1	-0.108681	-0.119197	-6.17365	1.44821e-09	5.75655e-09	10.9481
PFN1	0.108593	0.0381021	8.84143	1.93107e-17	1.92331e-16	28.7261
ZNF292	0.108553	0.0671808	8.705	5.46802e-17	5.17175e-16	27.7011
GTF2H5	-0.108488	-0.116176	-11.3531	1.48996e-26	5.07374e-25	49.4456
ZNF277	-0.108474	-0.0350519	-11.0997	1.42672e-25	4.11875e-24	47.211
ZNF182	-0.108468	-0.0738518	-10.3136	1.30337e-22	2.51846e-21	40.4724
HAMP	0.108455	-0.185614	3.42117	0.000678178	0.00125814	-1.56376
CREB5	-0.108431	-0.081965	-7.18724	2.62844e-12	1.44965e-11	17.1119
CXorf21	0.108425	0.00497148	6.24604	9.46296e-10	3.86276e-09	11.3624
SELE	0.108407	-0.187429	3.24593	0.00125461	0.00224213	-2.13311
CPXM2	0.108383	0.0288588	5.186	3.20416e-07	9.42009e-07	5.71485
SSBP3	0.108364	0.0547697	13.6452	6.29351e-36	1.07389e-33	70.8204
PSMD8	-0.108258	-0.114571	-9.26396	7.16804e-19	8.53721e-18	31.9719
DCC	-0.108249	-0.137627	-6.02814	3.36586e-09	1.26757e-08	10.1277
MARCO	0.108215	-0.0500785	3.11756	0.00193586	0.0033654	-2.53206
IQSEC3	0.108094	0.112534	8.92095	1.04731e-17	1.07693e-16	29.3288
EML1	-0.108093	-0.106904	-11.2193	4.93034e-26	1.53174e-24	48.2619
KCNIP2	0.108083	0.143912	14.8189	5.15174e-41	3.3215e-38	82.4314
VCX3A	0.107975	0.11495	9.44739	1.66164e-19	2.14549e-18	33.4135
DLAT	-0.107966	-0.0527128	-9.31646	4.72658e-19	5.76791e-18	32.3825
COL1A2	0.107937	0.0266037	4.32782	1.8426e-05	4.27845e-05	1.83101
EDG8	-0.107841	-0.0903996	-5.51172	5.8795e-08	1.90042e-07	7.35284
LOC145663///GATM	-0.107771	-0.0452562	-10.226	2.73311e-22	5.02987e-21	39.7409
SCARA3	0.107723	0.00198967	7.13542	3.69527e-12	2.00544e-11	16.7784
HLA-DRB3	0.107689	-0.00869656	3.84912	0.000135009	0.000276449	-0.0542479
LILRB2	0.107683	0.0176157	5.27724	2.00993e-07	6.07154e-07	6.16476
GABRA5	-0.107577	-0.149729	-4.69771	3.46327e-06	8.84545e-06	3.42693
PCDHGA5	0.107546	0.0973867	12.0848	1.87909e-29	9.95761e-28	56.0521
LOC201229	-0.107509	-0.088653	-4.63191	4.70172e-06	1.18151e-05	3.13429
GNAI2	0.107475	0.0594655	9.07901	3.06953e-18	3.41408e-17	30.5382
MATK	0.107447	0.0209383	12.7038	5.61653e-32	4.48905e-30	61.808
DSTN	-0.107437	-0.0897326	-7.66626	1.03162e-13	6.72066e-13	20.286
EEF1A1	-0.107416	0.171414	-7.79886	4.09536e-14	2.77257e-13	21.1928
NCAPG2	-0.107396	-0.0682887	-11.265	3.2794e-26	1.05541e-24	48.6652
ATM	-0.107358	-0.0839134	-6.59544	1.14797e-10	5.25042e-10	13.4191
LENG4	0.107335	0.0545508	12.8642	1.21738e-32	1.06065e-30	63.3225
BCL7A	0.107307	0.0352385	12.9114	7.74741e-33	6.90554e-31	63.7702
NLRP5	0.107296	0.0774526	5.896	7.13747e-09	2.58188e-08	9.39729
PTMS	0.107288	0.127591	12.1446	1.07843e-29	5.92584e-28	56.6018
USP14	-0.107223	-0.0672287	-10.7618	2.7711e-24	6.61711e-23	44.2779
NCKIPSD	0.107213	0.0160372	10.1119	7.13835e-22	1.23277e-20	38.7927
HIST1H4E	0.107194	0.0273407	7.48247	3.64015e-13	2.22387e-12	19.0492
PCP4	-0.107185	-0.150152	-4.51948	7.86129e-06	1.9143e-05	2.64298
KCNJ13	0.107175	0.0442994	5.29236	1.85923e-07	5.6401e-07	6.24
FPR1	0.107164	-0.114851	3.69578	0.000245141	0.00048373	-0.614399
MOAP1	-0.107158	-0.145142	-5.20617	2.89199e-07	8.54911e-07	5.8137
GGTLA1	0.107156	0.100805	10.0714	1.00165e-21	1.69947e-20	38.4582
LOC202347	0.107117	0.0825788	13.4868	2.96607e-35	4.482e-33	69.2841
ZNF609	0.106935	0.0734158	10.4206	5.24204e-23	1.06728e-21	41.3723
PLEKHB2	-0.10689	-0.0908429	-7.48751	3.51765e-13	2.15311e-12	19.0827
RGR	0.106776	0.00738641	5.66038	2.63661e-08	8.8923e-08	8.12951
PKN1	0.106769	0.0731774	11.5097	3.64025e-27	1.34114e-25	50.8399
WBP4	-0.106757	-0.0720454	-10.3688	8.15037e-23	1.62186e-21	40.9362
PYGL	0.106752	-0.0606105	4.58057	5.95338e-06	1.47761e-05	2.90857
ACP1	-0.106737	-0.0277298	-8.41724	4.73261e-16	4.01307e-15	25.5769
LOC150166	0.106728	0.0251236	6.55177	1.50172e-10	6.75181e-10	13.1569
C3orf28	-0.106642	-0.10215	-6.55579	1.46516e-10	6.60125e-10	13.181
MGAT1	0.106635	0.0498923	9.01554	5.03355e-18	5.44818e-17	30.0507
PIK3C2A	-0.106634	-0.0501307	-7.35496	8.61316e-13	5.0392e-12	18.2049
ALPL	0.106592	0.0707701	11.6345	1.17403e-27	4.71124e-26	51.9596
HTATIP2	-0.106543	-0.0800892	-8.68104	6.55727e-17	6.15054e-16	27.5222
PCDHGB4	0.106525	0.118194	13.1343	9.08629e-34	9.87343e-32	65.8933
STYK1	-0.106521	-0.209862	-3.94501	9.20244e-05	0.000193471	0.306901
PCDHGB2	0.106499	0.105183	12.3508	1.57307e-30	9.7209e-29	58.5078
ERP29	-0.106473	-0.0926831	-10.6348	8.33109e-24	1.87154e-22	43.1899
PCDHGA12	0.10636	0.102116	13.3794	8.44757e-35	1.17225e-32	68.247
UBE2N	-0.106298	-0.0970309	-11.2869	2.69654e-26	8.78056e-25	48.8588
LOC643037	-0.10627	-0.133952	-5.09967	4.95065e-07	1.41646e-06	5.29556
DLX1	-0.106263	-0.123531	-5.0008	8.08709e-07	2.25001e-06	4.82317
GALNT5	-0.106258	-0.0730635	-9.44703	1.6664e-19	2.1502e-18	33.4107
C9orf16	0.106257	0.069786	10.9667	4.61367e-25	1.21483e-23	46.0504
F10	0.106241	0.0432874	6.65435	7.97249e-11	3.71507e-10	13.7751
CFL1	0.106239	0.109758	9.3702	3.08111e-19	3.86728e-18	32.8045
CSPG4	0.106237	0.0651846	6.97796	1.02855e-11	5.30936e-11	15.7766
XKR4	-0.106213	-0.128992	-6.87025	2.05073e-11	1.0268e-10	15.1017
NME5	-0.106203	-0.128743	-5.96661	4.78443e-09	1.7657e-08	9.78587
NP	0.106202	-0.0265536	4.83242	1.83141e-06	4.85849e-06	4.03776
CFI	0.10615	-0.0574095	3.94676	9.13745e-05	0.000192168	0.313588
NPTX2	-0.106105	-0.155606	-4.18358	3.42727e-05	7.66627e-05	1.24139
PDHB	-0.106101	-0.105594	-10.8917	8.91247e-25	2.28324e-23	45.3994
LOC728217	-0.10609	-0.0940368	-10.6547	7.01923e-24	1.5935e-22	43.3593
ZNF646	0.106085	0.0737101	10.7614	2.78017e-24	6.63059e-23	44.2747
HSP90AA5P	-0.106077	-0.0934349	-7.15533	3.24276e-12	1.77167e-11	16.9063
MGC20983	0.106071	0.0111609	8.76956	3.34599e-17	3.25544e-16	28.1847
GTF3C1	0.106069	0.0363306	12.6116	1.34717e-31	1.01785e-29	60.9415
CAP2	-0.106028	-0.185285	-4.29736	2.10365e-05	4.84678e-05	1.70498
NFYB	-0.105966	-0.0685806	-12.3584	1.4653e-30	9.11311e-29	58.5781
LANCL1	-0.105907	-0.0650854	-9.29444	5.62943e-19	6.79678e-18	32.2102
CHP	-0.105835	-0.0783404	-9.58392	5.52947e-20	7.54771e-19	34.499
NUDT6	-0.105828	-0.0430848	-8.78493	2.97561e-17	2.91709e-16	28.3003
WASL	-0.105799	-0.123899	-6.62312	9.67585e-11	4.46446e-10	13.586
YWHAZ	-0.105791	-0.06758	-7.52021	2.81518e-13	1.74635e-12	19.3012
PLEKHM2	0.105618	0.0823214	11.7895	2.85595e-28	1.23303e-26	53.3585
PLK2	-0.105551	-0.181001	-5.32094	1.6038e-07	4.90602e-07	6.3827
SNAPC5	-0.105522	-0.13076	-8.65151	8.19865e-17	7.60203e-16	27.3023
C9orf64	-0.105444	-0.0611624	-9.8645	5.58103e-21	8.6693e-20	36.7622
UBLCP1	-0.105415	-0.0724649	-7.75881	5.42011e-14	3.62753e-13	20.9177
LOC643008	-0.105394	-0.0807983	-6.12516	1.92165e-09	7.49972e-09	10.6729
TPM2	0.10537	0.0650408	7.30479	1.20502e-12	6.89162e-12	17.8758
CLTB	0.105311	0.0582136	11.9591	6.01224e-29	2.94402e-27	54.9008
BSG	0.105261	0.0709705	9.75881	1.33061e-20	1.95419e-19	35.9046
SOX13	0.10525	0.105316	8.8882	1.34803e-17	1.36798e-16	29.0802
RARRES2	0.10524	0.0432004	7.91207	1.84377e-14	1.3044e-13	21.9765
LOC285796	-0.105214	-0.104721	-5.04367	6.54362e-07	1.84312e-06	5.02695
CD99	0.105206	0.0733857	5.08548	5.3146e-07	1.5137e-06	5.22724
LOC51039///DMN	-0.105185	-0.0748613	-8.45474	3.58285e-16	3.07587e-15	25.8508
RNF170	-0.105156	-0.0125802	-10.6247	9.09415e-24	2.02649e-22	43.1033
SIN3B	0.105148	0.0553847	13.7841	1.60565e-36	3.10565e-34	72.1742
ANKRD13D	0.105144	0.0421404	7.93262	1.59363e-14	1.13532e-13	22.1197
C10orf116	0.1051	0.037439	5.28585	1.92276e-07	5.82186e-07	6.20756
PCDHGA7	0.105068	0.13816	13.2277	3.68351e-34	4.37095e-32	66.7879
OXCT1	-0.105042	-0.153958	-6.51574	1.87233e-10	8.31183e-10	12.9417
ATP10B	-0.105025	-0.084299	-6.50613	1.98546e-10	8.79184e-10	12.8845
ACTG2	0.105	-0.0744166	3.1162	0.00194461	0.0033791	-2.53619
CRK	-0.104973	-0.0887627	-12.3141	2.21916e-30	1.32325e-28	58.1671
TMEM102	0.104951	0.1557	8.86319	1.63398e-17	1.6435e-16	28.8907
TNNT2	0.104915	-0.00589517	8.47391	3.10664e-16	2.68853e-15	25.9911
TAF9B	-0.104896	-0.0773519	-11.7602	3.73486e-28	1.5842e-26	53.093
PVRL2	0.10485	0.0596731	9.53714	8.07092e-20	1.08108e-18	34.1259
TBPL1	-0.104841	-0.11325	-7.84789	2.90156e-14	2.0015e-13	21.5312
CLDN5	0.104836	0.0296852	5.40544	1.03199e-07	3.23093e-07	6.80869
MKL1	0.104827	0.0422389	13.8433	8.95369e-37	1.82297e-34	72.753
VEGFB	0.104817	0.0533577	9.77318	1.18281e-20	1.74773e-19	36.0208
PCDHGA3	0.1048	0.114931	12.9994	3.33278e-33	3.19819e-31	64.6058
RYBP	-0.104798	-0.131168	-7.49599	3.32036e-13	2.0414e-12	19.1393
FLJ20254	0.104794	0.0427129	11.9664	5.61776e-29	2.77191e-27	54.968
PHYHD1	0.104786	0.0499163	4.78493	2.29661e-06	6.01179e-06	3.82061
GABARAPL2	-0.104777	-0.0610845	-12.1937	6.82728e-30	3.93016e-28	57.0544
BACE1	-0.104745	-0.0567755	-11.4871	4.46386e-27	1.63214e-25	50.6381
PPP2R4	0.104744	0.0697478	14.7787	7.74506e-41	4.63426e-38	82.0272
CASK	-0.104716	-0.0564209	-11.5903	1.75376e-27	6.83894e-26	51.5625
CCNYL1	-0.104716	-0.0653512	-10.2117	3.08563e-22	5.65173e-21	39.6211
HSD17B3	-0.104701	-0.14185	-5.43459	8.85252e-08	2.80055e-07	6.95697
SIPA1	0.104695	0.0335864	6.50036	2.05655e-10	9.08793e-10	12.8502
PEX6	0.104691	-0.00478445	4.81094	2.02933e-06	5.34979e-06	3.93929
SEPN1	0.104652	0.0695748	12.1758	8.06965e-30	4.56384e-28	56.8889
CCNE2	-0.104651	-0.00487268	-6.63347	9.0749e-11	4.20222e-10	13.6486
TCEAL3	-0.104646	-0.0436073	-9.20229	1.16676e-18	1.36359e-17	31.4916
hCG_2023776	-0.104631	0.0478487	-11.0617	1.99592e-25	5.59494e-24	46.879
RABGGTB	-0.104586	-0.0631741	-12.6811	6.96854e-32	5.47908e-30	61.5944
RGS17	-0.104578	-0.127724	-6.34772	5.1705e-10	2.17882e-09	11.9512
NEK3	-0.10451	-0.0119399	-7.58262	1.83633e-13	1.15997e-12	19.7203
IL18	0.104469	-0.0683183	3.62466	0.000321061	0.000624243	-0.866925
PTGFR	0.104458	0.0342918	4.99766	8.2131e-07	2.28211e-06	4.8083
CNIH2	0.104455	0.321331	5.12805	4.29371e-07	1.24028e-06	5.43271
RSPRY1	-0.104341	-0.0702423	-13.3039	1.76098e-34	2.27073e-32	67.5191
PCGF1	0.104328	0.0267998	14.6154	4.03121e-40	1.99927e-37	80.3917
SDHB	-0.104328	-0.106137	-10.7779	2.40882e-24	5.79495e-23	44.4164
SVIL	0.104319	0.0292507	6.06033	2.7968e-09	1.06555e-08	10.3078
P4HA2	0.104311	0.00545232	6.76305	4.04152e-11	1.95967e-10	14.4387
NUP93	-0.104301	-0.0711193	-11.9002	1.0335e-28	4.8402e-27	54.3646
ADORA2B	0.104241	0.0171428	6.52449	1.77489e-10	7.90101e-10	12.9939
G6PC3	0.104181	0.0606058	10.7119	4.2751e-24	1.00108e-22	43.8494
GRHL1	-0.104129	-0.0884709	-6.16249	1.54587e-09	6.11332e-09	10.8846
ABHD14B	0.104086	0.0663303	10.1665	4.51114e-22	8.0866e-21	39.246
MRPS14	-0.104048	-0.0560715	-8.80842	2.48664e-17	2.45016e-16	28.4771
TMEM65	-0.103964	-0.128359	-6.85554	2.25184e-11	1.12082e-10	15.0103
C1orf19	-0.103921	-0.0789636	-12.6693	7.79858e-32	6.08226e-30	61.4829
LOC647509	-0.103906	-0.102587	-4.92577	1.16744e-06	3.17693e-06	4.47018
C2orf47	-0.103871	-0.0669014	-10.6625	6.55706e-24	1.50268e-22	43.4266
COPG	0.103862	0.0401884	11.3143	2.11095e-26	7.02754e-25	49.101
ZNF43	-0.103808	-0.0412	-9.9386	3.0245e-21	4.81877e-20	37.367
ZIC1	0.103762	-0.0121345	4.33002	1.82495e-05	4.24156e-05	1.84016
LOC645158	-0.103761	-0.0217724	-9.49376	1.14481e-19	1.50734e-18	33.781
C3orf26	-0.103713	-0.0837845	-7.6077	1.5455e-13	9.84297e-13	19.8894
SR140	-0.103704	-0.0729235	-10.1435	5.47455e-22	9.70566e-21	39.0548
PCSK4	0.103701	0.0403838	12.836	1.5948e-32	1.35888e-30	63.055
DDX1	-0.103681	-0.0922542	-8.74345	4.08248e-17	3.90908e-16	27.9888
PVRL3	-0.103664	-0.0783407	-10.7106	4.3214e-24	1.0107e-22	43.8387
CCDC100	-0.103646	-0.117341	-11.0678	1.89271e-25	5.32104e-24	46.9315
USP13	-0.103543	-0.0780977	-12.4538	5.97765e-31	3.97319e-29	59.4659
ALG5	-0.103542	-0.0940819	-12.8802	1.04446e-32	9.26692e-31	63.4743
PCDHGC4	0.103537	0.09197	12.1302	1.23331e-29	6.66332e-28	56.4689
PGD	-0.103492	-0.095127	-9.83396	7.17847e-21	1.09673e-19	36.5138
LPHN1	0.103488	0.0933544	13.2036	4.65288e-34	5.3569e-32	66.5564
CCDC50	0.103425	0.0755437	7.7438	6.01895e-14	4.01305e-13	20.8148
PABPC3	-0.103346	0.140745	-10.8311	1.51417e-24	3.79367e-23	44.8754
C22orf36	0.103335	0.0539047	12.14	1.12532e-29	6.14859e-28	56.5596
MT1F	0.10333	0.007773	4.12862	4.32155e-05	9.52673e-05	1.02157
NRXN2	0.103328	0.0732759	11.3644	1.347e-26	4.60312e-25	49.5454
GNG3	-0.103259	-0.169059	-3.9295	9.79622e-05	0.00020513	0.247924
NFKB2	0.103255	0.0551546	10.4385	4.50052e-23	9.23107e-22	41.523
JPH4	0.103223	0.125458	10.0295	1.42035e-21	2.36831e-20	38.1133
LOC642817	-0.103116	0.02002	-11.1676	7.81286e-26	2.35384e-24	47.8066
ZNF281	-0.103111	-0.063588	-10.039	1.31221e-21	2.19746e-20	38.1915
TRIM47	0.103068	0.0142047	6.49976	2.06407e-10	9.11906e-10	12.8466
FURIN	0.103018	0.066189	12.9683	4.48982e-33	4.2362e-31	64.3106
DSN1	-0.10301	-0.105681	-10.0089	1.68704e-21	2.78183e-20	37.9434
TSLP	0.102967	0.0195932	5.35839	1.3201e-07	4.08533e-07	6.57074
LOC643327	-0.102954	-0.0319219	-11.1662	7.90584e-26	2.37815e-24	47.7949
FUT8	-0.102916	-0.0549268	-11.0972	1.4582e-25	4.20335e-24	47.1894
CALML3	-0.10285	0.0303603	-8.99204	6.04152e-18	6.45252e-17	29.8709
SLC26A6	0.102804	0.0374287	7.36771	7.90658e-13	4.65254e-12	18.2888
IGF1	-0.102793	-0.0899359	-4.18513	3.40491e-05	7.61802e-05	1.2476
AZIN1	-0.102783	-0.0702607	-9.50973	1.00665e-19	1.3336e-18	33.9079
BECN1	-0.102775	-0.0839352	-10.0438	1.26126e-21	2.12132e-20	38.2306
LRFN4	0.102751	0.076724	10.7743	2.48425e-24	5.94682e-23	44.386
LYVE1	0.1027	0.00995907	5.55522	4.65818e-08	1.52142e-07	7.57822
ALDH1L1	0.102662	-0.0142712	5.22989	2.56242e-07	7.62733e-07	5.93041
TGFA	-0.102615	-0.0495822	-6.52358	1.78473e-10	7.94117e-10	12.9885
PKD1	0.102577	0.0942798	13.7576	2.08343e-36	3.95076e-34	71.916
PRX	0.102576	0.138138	6.81865	2.84568e-11	1.40089e-10	14.7815
STOM	0.102571	0.0274845	5.56761	4.358e-08	1.42869e-07	7.64271
SLC25A5	-0.102541	-8.39716e-05	-10.0158	1.59209e-21	2.63424e-20	38.0006
BLOC1S1	0.102537	0.0693256	12.3202	2.09544e-30	1.2587e-28	58.2239
OXR1	-0.102511	-0.106919	-7.4278	5.27345e-13	3.17655e-12	18.6858
CCDC53	-0.102507	-0.0874039	-13.2309	3.5731e-34	4.2661e-32	66.818
E2F3	-0.102439	-0.105418	-7.7622	5.29336e-14	3.54761e-13	20.9409
C20orf177	-0.102436	-0.0817476	-9.69213	2.29496e-20	3.29785e-19	35.3667
UCHL3	-0.102403	-0.0817402	-9.98673	2.02835e-21	3.31634e-20	37.7615
GABRD	-0.102368	-0.0927256	-5.53393	5.22163e-08	1.69831e-07	7.46768
SERPING1	0.10236	0.0208603	5.71153	1.99282e-08	6.83425e-08	8.40088
SRRM1	-0.10235	-0.0744219	-14.2427	1.69728e-38	4.82776e-36	76.6838
SCARA5	0.102331	-0.000158392	6.04334	3.08431e-09	1.16836e-08	10.2126
CCND1	0.102267	0.06382	7.59424	1.69547e-13	1.07556e-12	19.7986
BMP5	0.102251	0.0425589	4.4921	8.89517e-06	2.15036e-05	2.52503
ABO	-0.102232	-0.0658979	-10.6159	9.81181e-24	2.16644e-22	43.0282
CUL4B	-0.102229	-0.098161	-8.76982	3.33936e-17	3.25063e-16	28.1867
DLEU7	-0.102224	-0.132421	-5.47571	7.12168e-08	2.27644e-07	7.16738
ABCA9	-0.102211	-0.0372056	-7.84156	3.03379e-14	2.08676e-13	21.4874
PPFIBP1	0.102159	0.0421536	10.9736	4.34098e-25	1.15652e-23	46.1107
AXL	0.102133	0.0641518	8.56603	1.56046e-16	1.39859e-15	26.6687
PI15	0.102045	-0.0734553	5.61985	3.28674e-08	1.09343e-07	7.91595
TMEM16B	0.102044	0.0535206	7.258	1.64553e-12	9.27115e-12	17.5706
EIF3A	-0.101889	-0.0614072	-18.5446	5.79284e-58	5.60225e-54	121.141
THAP9	-0.101838	-0.0877159	-7.62056	1.41453e-13	9.05356e-13	19.9763
PLEKHG2	0.101798	0.0325303	7.06451	5.87242e-12	3.11788e-11	16.325
UBC///SCARB1	0.101753	0.0578286	6.83092	2.63278e-11	1.30006e-10	14.8575
PRPH2	-0.101673	-0.184481	-4.12266	4.43097e-05	9.75238e-05	0.99788
PDGFB	0.101648	0.0980402	8.15608	3.20836e-15	2.47235e-14	23.6948
BLVRA	-0.101647	-0.099792	-7.17069	2.93116e-12	1.60744e-11	17.0052
TCTN1	0.101626	0.185741	8.76517	3.46001e-17	3.35962e-16	28.1517
FOSB	0.101625	-0.0618893	6.20058	1.23681e-09	4.9714e-09	11.1017
PCDHGA11	0.101614	0.121513	13.1658	6.70922e-34	7.4716e-32	66.1938
SSBP4	0.101602	0.0871501	8.96566	7.41198e-18	7.7872e-17	29.6694
CMPK	-0.101529	-0.10005	-9.89287	4.41565e-21	6.93243e-20	36.9934
ANGPT2	0.101482	-0.0760179	3.18322	0.00155346	0.00273827	-2.32992
LAMB2	0.101479	0.0805209	9.73743	1.5851e-20	2.31214e-19	35.7319
TMBIM1	0.101448	0.0086496	4.82389	1.90768e-06	5.04834e-06	3.99861
SLC11A1	0.101408	-0.0672631	4.61462	5.09189e-06	1.27574e-05	3.05803
PRMT5	-0.101379	-0.0848561	-12.9874	3.73985e-33	3.56336e-31	64.4916
ETNK1	-0.101343	-0.127821	-7.63172	1.30973e-13	8.42458e-13	20.0518
UAP1	-0.101332	-0.103868	-7.91433	1.81452e-14	1.28559e-13	21.9922
RAB21	-0.101267	-0.0701367	-13.6589	5.49824e-36	9.58081e-34	70.9543
VASP	0.101128	0.025439	6.51566	1.87329e-10	8.31417e-10	12.9412
SLC2A11	-0.101068	-0.0809078	-8.65439	8.02201e-17	7.44895e-16	27.3237
NDUFA4	-0.101061	-0.0122113	-6.11203	2.07392e-09	8.06144e-09	10.5987
CCNC	-0.101001	-0.0461571	-10.517	2.29782e-23	4.84673e-22	42.1872
GALNACT-2	-0.100966	-0.0720916	-10.0392	1.31087e-21	2.19713e-20	38.1925
LMBRD1	-0.100957	-0.0891813	-11.6333	1.1873e-27	4.75461e-26	51.9485
FAM73A	-0.100941	-0.0219196	-6.56861	1.35419e-10	6.13125e-10	13.2579
FANCC	0.100914	0.00437075	6.61836	9.96504e-11	4.58586e-10	13.5572
ANKRD13C	-0.100907	0.024603	-9.01995	4.86389e-18	5.27636e-17	30.0845
ZNF660	0.100898	0.105419	9.85402	6.08504e-21	9.4007e-20	36.6769
HES1	0.10089	0.0924691	5.77813	1.37973e-08	4.82757e-08	8.75748
KIF2A	-0.10083	-0.0965977	-11.0881	1.58116e-25	4.51739e-24	47.1094
WEE1	0.100824	0.0254832	6.30671	6.60396e-10	2.74933e-09	11.7128
CLEC5A	0.100799	0.0694923	5.11845	4.50598e-07	1.2981e-06	5.38622
SLC27A4	-0.100737	-0.0806767	-8.00978	9.19654e-15	6.7175e-14	22.6598
SOX15	0.100737	0.120533	11.8341	1.89704e-28	8.41572e-27	53.7634
GPR175	0.100625	0.106593	12.5332	2.82797e-31	1.98904e-29	60.2071
PPFIA3	0.100589	0.0397482	13.8336	9.8499e-37	1.98455e-34	72.6585
FIGN	0.100579	0.0792384	6.57761	1.28129e-10	5.82576e-10	13.3119
MED31	-0.10051	-0.0869946	-8.53334	1.99348e-16	1.77112e-15	26.4277
NET1	-0.100505	-0.0633997	-6.66213	7.59667e-11	3.55258e-10	13.8222
TRIM44	-0.10048	-0.0527781	-10.6356	8.27474e-24	1.86105e-22	43.1966
RRAGB	-0.100467	-0.134663	-9.88951	4.54018e-21	7.11062e-20	36.966
ANPEP	0.100462	0.069993	7.73502	6.39856e-14	4.25441e-13	20.7548
PPP1R13L	0.100349	0.065243	11.1621	8.20245e-26	2.45972e-24	47.7585
COL4A1	0.100348	-0.0832049	3.88265	0.000118181	0.000244333	0.0710859
HCG22	-0.100348	-0.0884462	-4.16325	3.73535e-05	8.30736e-05	1.15975
CLIC1	0.100329	-0.0196055	4.54128	7.12143e-06	1.74402e-05	2.73738
IMMT	-0.100224	-0.0608745	-9.13188	2.02946e-18	2.28885e-17	30.946
ACCN3	0.100197	0.0401919	11.9699	5.43832e-29	2.69023e-27	55.0001
SLC39A9	-0.100179	-0.0604576	-8.81388	2.38488e-17	2.3583e-16	28.5182
BEX5	-0.100173	-0.179712	-4.06604	5.60945e-05	0.000121716	0.774596
B3GAT3	0.100111	0.020494	13.0271	2.55283e-33	2.58518e-31	64.8699
MS4A6A	0.100086	-0.031263	4.34302	1.72418e-05	4.02475e-05	1.89422
KLK5	-0.100072	-0.129257	-4.44787	1.08463e-05	2.59222e-05	2.33583
CHRM3	-0.100055	-0.183215	-5.0323	6.92248e-07	1.94388e-06	4.97278
SSR3	-0.100019	-0.0453131	-9.31717	4.70003e-19	5.74276e-18	32.3881
TTC3	-0.100009	-0.0632148	-9.62906	3.83442e-20	5.32929e-19	34.8602
ZNF135	-0.0999729	-0.0196024	-14.1231	5.58734e-38	1.36798e-35	75.5027
CDC40	-0.099971	-0.110003	-6.66822	7.31423e-11	3.43128e-10	13.8592
DLGAP3	0.0999605	0.0551155	9.63995	3.50974e-20	4.92994e-19	34.9475
MIST	0.0999093	0.12181	9.77398	1.17504e-20	1.73891e-19	36.0273
PPARD	0.0998907	0.0921521	12.0289	3.15501e-29	1.6059e-27	55.5391
PAR5	-0.0998857	-0.120358	-4.88884	1.39626e-06	3.7582e-06	4.29823
MAPK15	0.0998726	0.144223	13.153	7.58975e-34	8.38862e-32	66.0716
ANKRD39	-0.0998649	-0.0987999	-6.08519	2.42294e-09	9.32626e-09	10.4474
ROR2	0.09986	0.0652513	10.5161	2.31544e-23	4.87857e-22	42.1797
RIT2	-0.0998539	-0.134625	-4.57016	6.24344e-06	1.54485e-05	2.8631
TEAD3	0.0998426	0.0291799	9.30158	5.31927e-19	6.44241e-18	32.2661
RBMX	-0.0998157	-0.0816636	-9.94256	2.92673e-21	4.68616e-20	37.3995
PID1	-0.0998016	-0.115021	-7.32066	1.08378e-12	6.24624e-12	17.9797
STMN1	-0.0997591	-0.130384	-6.57447	1.30626e-10	5.93091e-10	13.293
DLST	0.0997528	0.065481	12.7889	2.49927e-32	2.08366e-30	62.61
SPSB1	0.0997225	0.0542532	6.87242	2.02249e-11	1.0137e-10	15.1153
ZNF155	-0.099671	-0.0386165	-9.31379	4.82795e-19	5.8842e-18	32.3616
TMEM30B	0.0996594	0.0330007	6.79467	3.31147e-11	1.61825e-10	14.6333
RANGAP1	-0.0996491	-0.0735636	-8.30398	1.09115e-15	8.90132e-15	24.7552
NDN	-0.099632	-0.0976294	-7.01219	8.24572e-12	4.30818e-11	15.9928
KCNA6	-0.0996265	-0.0878102	-6.7749	3.7511e-11	1.82434e-10	14.5115
EAF1	-0.0996115	-0.0947545	-8.72256	4.78526e-17	4.55943e-16	27.8324
PSD	0.0995783	0.0610493	11.2248	4.69271e-26	1.47348e-24	48.3108
TBC1D10B	0.099521	0.0829414	14.3821	4.20627e-39	1.42733e-36	78.0667
ACSS2	-0.0995002	-0.0808986	-8.29862	1.13491e-15	9.23883e-15	24.7166
FUNDC2	-0.0994822	-0.059725	-12.5233	3.10592e-31	2.16877e-29	60.1143
HEBP2	0.0994483	0.0338393	6.84063	2.47563e-11	1.22527e-10	14.9177
KIAA0232	-0.0994365	-0.0904244	-12.1701	8.50837e-30	4.7863e-28	56.8365
WSB2	-0.0994287	-0.0431583	-6.88917	1.81775e-11	9.16314e-11	15.2196
TFCP2	-0.0994283	-0.0537999	-13.1375	8.81711e-34	9.6898e-32	65.9231
ETV5	-0.0993902	-0.0328448	-5.53392	5.22173e-08	1.69831e-07	7.46766
PCDHGA8	0.0993789	0.105944	12.3706	1.3062e-30	8.22213e-29	58.6919
PTER	-0.0993543	-0.0789649	-7.22468	2.05238e-12	1.14434e-11	17.3542
GOT2	-0.0993469	-0.11393	-8.4761	3.05632e-16	2.6521e-15	26.0072
CSF3	0.0993163	0.0592232	10.2867	1.63645e-22	3.11232e-21	40.2476
POLR2A	0.0993029	0.0710407	11.9367	7.38608e-29	3.55377e-27	54.6971
PARK2	-0.0992708	-0.0592447	-9.34571	3.74532e-19	4.65266e-18	32.612
SPAG6	-0.0992381	-0.122699	-6.02307	3.46512e-09	1.30216e-08	10.0995
TNFRSF1B	0.0991605	0.00396156	4.94859	1.04464e-06	2.86317e-06	4.57701
GOLGA7	-0.0991145	-0.0358538	-8.28307	1.272e-15	1.02598e-14	24.6044
SNORD47	-0.0990891	-0.0762969	-7.26327	1.58895e-12	8.96018e-12	17.6049
PAR4	0.0990734	0.112039	9.54147	7.79348e-20	1.04536e-18	34.1604
CMTM5	-0.0990531	-0.0493199	-5.2961	1.8237e-07	5.53751e-07	6.25863
YAF2	-0.099048	-0.111356	-10.7824	2.31602e-24	5.60656e-23	44.4553
OPTN	-0.0990276	-0.0514327	-9.88252	4.8098e-21	7.50856e-20	36.909
DLL4	0.0990259	0.0458363	5.09928	4.96019e-07	1.41839e-06	5.29371
FIGNL1	-0.0990173	-0.0813161	-8.60524	1.1622e-16	1.05834e-15	26.9588
KCNS1	0.0990032	-0.00598568	7.09988	4.66319e-12	2.50404e-11	16.5506
ZNF514	-0.0989682	0.00583558	-7.55715	2.18691e-13	1.3689e-12	19.5489
LOC344382	-0.0989644	-0.0870164	-10.1257	6.35648e-22	1.10863e-20	38.9073
CCDC39	0.098956	0.0120462	10.3889	6.87346e-23	1.3863e-21	41.1046
C13orf33	0.0989512	-0.0679275	4.10591	4.75242e-05	0.00010416	0.931543
GLRA2	-0.0989478	-0.0626969	-5.93984	5.57055e-09	2.04102e-08	9.63806
ZNF816A	-0.0989084	-0.100265	-9.95123	2.72377e-21	4.39026e-20	37.4704
KIAA1305	0.098889	0.0582768	9.53484	8.22157e-20	1.09897e-18	34.1076
PDLIM4	0.0988714	-0.052047	4.24537	2.63283e-05	5.98686e-05	1.49172
SACS	-0.0988602	-0.0853708	-6.36162	4.75745e-10	2.01134e-09	12.0324
ZNF253	-0.0988515	-0.0127655	-10.958	4.98167e-25	1.30918e-23	45.9745
FMR1	-0.0987637	-0.0699909	-10.2943	1.53419e-22	2.94388e-21	40.3113
HIST1H2BD	0.0987502	-0.0351147	5.13113	4.22781e-07	1.22288e-06	5.44762
LOC221091	0.0987206	0.0878921	7.95738	1.33645e-14	9.5917e-14	22.2926
AFMID	-0.0987084	-0.0865508	-7.39907	6.40197e-13	3.81946e-12	18.4957
DNAJA5	-0.0986829	-0.0837299	-13.1345	9.06885e-34	9.87343e-32	65.8952
IGHG3	0.098659	0.0317809	5.44956	8.17942e-08	2.5978e-07	7.03344
ATP8A2	-0.0986461	-0.157857	-4.645	4.42561e-06	1.1172e-05	3.1922
PELI3	0.0986415	0.0227264	8.46668	3.27831e-16	2.8295e-15	25.9382
SIX5	0.0985702	0.0471399	6.37076	4.50389e-10	1.91124e-09	12.0858
SYNJ2	-0.0985684	-0.0983552	-7.41528	5.73889e-13	3.44405e-12	18.6028
EIF1AY	-0.0985372	-0.0782295	-2.95933	0.00323941	0.00544651	-3.0025
TNK1	0.0985367	0.0701217	11.3667	1.31898e-26	4.51534e-25	49.5662
AKAP13	0.0985133	0.013485	10.9683	4.54957e-25	1.20052e-23	46.0643
LIMK1	0.0984967	0.0568694	8.592	1.28391e-16	1.16479e-15	26.8607
HSPA12A	-0.0984777	-0.0189519	-9.51143	9.93029e-20	1.31736e-18	33.9214
MLL2	0.0984763	0.0793667	16.3209	9.92818e-48	3.20051e-44	97.7654
FOXP4	0.0984708	0.0700658	14.4423	2.29956e-39	9.07716e-37	78.6654
PAIP2	-0.0984454	-0.0795896	-14.4555	2.0142e-39	8.11641e-37	78.7967
LOC729409	-0.0984395	-0.0915391	-10.7828	2.30744e-24	5.5928e-23	44.4589
MYH14	0.0984389	0.0429448	9.58463	5.49738e-20	7.51451e-19	34.5047
PTPRU	0.0984356	0.0582211	10.4605	3.72913e-23	7.70607e-22	41.7088
TSN	-0.0984288	-0.0578081	-13.7199	3.02027e-36	5.51113e-34	71.548
GJB1	-0.0983608	-0.0876745	-5.3416	1.44064e-07	4.42862e-07	6.48633
KIAA1394	-0.0983504	-0.0894277	-5.04572	6.47728e-07	1.82549e-06	5.03676
C1QTNF1	0.098345	0.0616775	9.33158	4.19102e-19	5.17576e-18	32.5011
SEMA3F	0.0983089	0.0300767	7.57194	1.97603e-13	1.24173e-12	19.6483
PPP1R14B	0.0982875	0.0779957	7.66097	1.07012e-13	6.96206e-13	20.2501
MOBKL2A	0.0982073	0.0846433	10.1732	4.26687e-22	7.65582e-21	39.301
KIAA1383	-0.0981767	-0.00370273	-5.60525	3.55719e-08	1.17862e-07	7.83935
STIM1	0.0981565	0.00526828	10.7978	2.02575e-24	4.93477e-23	44.5877
LOC284933	0.0981337	0.0876145	4.7754	2.4027e-06	6.27336e-06	3.77731
USF1	0.0981335	0.0350927	6.75942	4.13492e-11	2.00144e-10	14.4163
MAGI1	-0.098068	-0.094361	-8.37589	6.42656e-16	5.37873e-15	25.2759
2019-03-01	-0.0979807	-0.0763715	-9.84997	6.29136e-21	9.68849e-20	36.644
JOSD2	0.0979566	0.0902533	11.9627	5.81251e-29	2.85344e-27	54.9342
MFAP2	0.0979173	0.046922	7.61127	1.50806e-13	9.62035e-13	19.9135
GLTP	-0.0977827	-0.0508489	-6.72725	5.05985e-11	2.42306e-10	14.2191
CASP4	0.0976551	-0.00639507	5.41849	9.63603e-08	3.02959e-07	6.87497
TTLL7	-0.0976413	-0.0780188	-9.41631	2.13146e-19	2.7105e-18	33.1679
LRP4	0.0976117	0.050103	4.8934	1.36581e-06	3.68086e-06	4.3194
UHMK1	0.0976051	0.0288214	5.10552	4.80776e-07	1.37929e-06	5.32377
ZNF545	-0.0975841	-0.0531595	-9.99361	1.91546e-21	3.13708e-20	37.818
GLP1R	0.0975794	0.0798284	5.43692	8.74413e-08	2.76807e-07	6.96888
ZRANB1	-0.09755	-0.0470285	-11.0326	2.58189e-25	7.09361e-24	46.6244
CENPH	-0.0974985	-0.0839796	-8.43165	4.25301e-16	3.62546e-15	25.6821
C1orf172	0.0974863	-0.0170325	7.13195	3.78051e-12	2.04998e-11	16.756
WBSCR22	-0.0974787	-0.0857726	-13.4127	6.11047e-35	8.88636e-33	68.5679
C10orf132	0.0974737	0.0191652	11.581	1.90934e-27	7.38625e-26	51.4784
GNAZ	-0.0974709	-0.0797298	-10.3851	7.09605e-23	1.4284e-21	41.0731
CHCHD3	-0.0974265	-0.0708781	-12.9384	5.98141e-33	5.43157e-31	64.0264
PTS	-0.0974248	-0.0656573	-9.02665	4.61697e-18	5.03106e-17	30.1359
CAMSAP1	-0.0974082	-0.110737	-10.3775	7.56864e-23	1.51232e-21	41.0094
FGFR4	0.0973738	0.0434741	6.43337	3.08882e-10	1.33536e-09	12.4535
GBL	0.0973373	0.0433491	11.3672	1.31328e-26	4.5038e-25	49.5705
NRD1	-0.0973182	-0.0402831	-12.0595	2.37655e-29	1.24236e-27	55.8196
GRIK1	-0.0973117	-0.0889361	-6.16674	1.50798e-09	5.97569e-09	10.9088
EPC1	-0.0972908	-0.0611379	-10.2403	2.4231e-22	4.48924e-21	39.8599
FLJ12529	0.0972857	0.0467869	13.1656	6.72142e-34	7.4716e-32	66.192
MOCS1	0.0972731	0.0380369	10.7037	4.59161e-24	1.06872e-22	43.7788
GOPC	-0.0972567	-0.0815742	-7.30389	1.21226e-12	6.93099e-12	17.87
CST4	0.0972562	0.092444	7.70965	7.6345e-14	5.03466e-13	20.5815
TSPAN5	-0.0972346	-0.146037	-5.66149	2.6208e-08	8.84415e-08	8.13534
LNX1	-0.0971359	-0.147869	-5.33662	1.47843e-07	4.53828e-07	6.46132
CSF1R	0.0970945	0.00755879	4.56986	6.25209e-06	1.54679e-05	2.86178
SMS	-0.0970908	-0.0996126	-8.93447	9.43499e-18	9.76936e-17	29.4317
NGB	0.0970673	0.0251199	8.48781	2.80106e-16	2.44265e-15	26.093
TBL1X	0.0970366	0.0773339	7.31591	1.11873e-12	6.42281e-12	17.9486
DOPEY2	-0.0969876	-0.10783	-6.58239	1.24415e-10	5.66355e-10	13.3406
TBC1D4	-0.0969827	-0.0531822	-8.29461	1.1688e-15	9.48279e-15	24.6876
WDR64	0.0969717	-0.0414146	5.01772	7.43995e-07	2.07983e-06	4.90341
CARTPT	-0.0969408	-0.235714	-2.59766	0.00968197	0.0150695	-3.98892
NNMT	0.0969308	-0.0137743	5.2477	2.33924e-07	7.00612e-07	6.01833
ENPP5	-0.0969257	-0.0877495	-5.59702	3.71892e-08	1.22938e-07	7.79629
RAD54L2	0.0969178	0.0425991	11.2854	2.73199e-26	8.86614e-25	48.8459
PLEC1	0.0968665	0.0305603	10.9077	7.74427e-25	1.99454e-23	45.5383
ABCA2	0.0968361	0.0993782	5.83203	1.02211e-08	3.63211e-08	9.04863
ZNF536	-0.0968242	-0.0578763	-9.69052	2.32517e-20	3.3363e-19	35.3538
PIK3CD	0.0967796	0.0163082	9.23778	8.81701e-19	1.04241e-17	31.7678
C20orf7	-0.0967595	-0.0949115	-8.45127	3.67647e-16	3.15205e-15	25.8254
SELM	0.0966953	0.046043	10.1897	3.71202e-22	6.71816e-21	39.4386
TSPAN14	0.0966785	0.067465	9.73208	1.65607e-20	2.41202e-19	35.6887
RYR1	0.0966713	0.0632788	8.26785	1.42193e-15	1.14052e-14	24.4949
ICHTHYIN	-0.0966668	-0.0688456	-5.96692	4.77591e-09	1.76323e-08	9.78761
PDCD7	-0.0965768	-0.0753122	-13.2519	2.91523e-34	3.59148e-32	67.0197
B4GALT4	0.0965674	0.0648297	9.34932	3.63908e-19	4.5265e-18	32.6404
IL13RA2	-0.0965247	-0.100901	-5.40767	1.01997e-07	3.19592e-07	6.82002
C9orf166	0.0965241	0.0476406	8.23075	1.86445e-15	1.48099e-14	24.2284
LOC157503	-0.0964952	-0.100385	-5.29186	1.86404e-07	5.65291e-07	6.2375
SC5DL	-0.0964799	-0.0931184	-8.50068	2.54462e-16	2.23211e-15	26.1875
ASB8	-0.0964321	-0.0560068	-12.5812	1.79572e-31	1.31203e-29	60.6569
ROM1	0.0964256	0.00959888	5.11273	4.63714e-07	1.33311e-06	5.35858
PTPRM	-0.0964158	-0.0986188	-9.97113	2.30907e-21	3.75628e-20	37.6335
GABRE	0.096359	0.00133683	6.35035	5.08978e-10	2.14574e-09	11.9666
TMCO3	-0.096343	-0.0305542	-11.87	1.36443e-28	6.22423e-27	54.0896
TMEM14B	-0.096312	-0.0687638	-8.57748	1.43193e-16	1.29121e-15	26.7533
OGFR	0.0962452	0.0532954	10.6543	7.03862e-24	1.59603e-22	43.3565
C5orf13	-0.0962132	-0.0528962	-5.77495	1.40434e-08	4.90745e-08	8.74033
SDHD	-0.0962084	-0.0277097	-12.2053	6.1303e-30	3.55007e-28	57.161
ZFYVE16	-0.0962029	-0.0853854	-7.52104	2.79917e-13	1.73698e-12	19.3068
HLTF	-0.0961801	-0.0726425	-6.74974	4.39426e-11	2.12219e-10	14.3569
FTH1	-0.0960924	0.165504	-6.9839	9.8989e-12	5.11937e-11	15.814
MND1	-0.096089	-0.0896644	-6.51947	1.83012e-10	8.13003e-10	12.964
DUSP6	-0.0960666	-0.0398499	-4.99659	8.25655e-07	2.29385e-06	4.80322
C21orf66	-0.0960461	-0.0838084	-9.47053	1.3799e-19	1.80459e-18	33.5968
RARRES3	0.0960317	-0.0316613	4.26166	2.45471e-05	5.60554e-05	1.55827
ARAF	0.0960253	0.0618226	9.19226	1.26268e-18	1.4686e-17	31.4137
SYT11	-0.0960185	-0.0901116	-9.72819	1.70961e-20	2.48813e-19	35.6573
OR7A5	0.0959689	-0.0185226	3.78959	0.000170597	0.000344112	-0.274246
EGLN1	-0.0959649	-0.0529897	-9.69896	2.17059e-20	3.12317e-19	35.4217
TCEAL5	-0.0959493	-0.076563	-7.27787	1.44188e-12	8.17377e-12	17.7
HRBL	0.0959377	0.0524773	9.34165	3.86812e-19	4.79597e-18	32.5802
MTF2	-0.0959187	-0.0774225	-8.36606	6.91011e-16	5.74861e-15	25.2046
TAGLN2	0.0958982	0.0514315	6.66536	7.44561e-11	3.48886e-10	13.8418
GAPDH	-0.0958658	0.0657458	-7.63589	1.2726e-13	8.19397e-13	20.08
FLJ30375	0.0958569	0.133482	11.7796	3.12746e-28	1.33535e-26	53.2686
GOLGA	-0.0958487	-0.0639312	-7.85781	2.70559e-14	1.87838e-13	21.5999
SAMD1	0.0958167	0.0654575	10.9722	4.39546e-25	1.16835e-23	46.0983
SIAH2	-0.0958119	-0.10221	-7.46243	4.17081e-13	2.53287e-12	18.9157
NCSTN	0.0958025	0.0687131	9.54293	7.70225e-20	1.03384e-18	34.172
MNT	0.0957807	0.0246712	9.67573	2.62311e-20	3.72513e-19	35.2348
ZWILCH	-0.0957655	-0.0806369	-6.03316	3.27019e-09	1.23443e-08	10.1557
ATCAY	-0.0957595	-0.0925216	-4.4479	1.08449e-05	2.59222e-05	2.33595
GNS	-0.0957308	-0.0846705	-8.16689	2.96662e-15	2.29338e-14	23.7718
NEGR1	-0.0957279	-0.178735	-3.92326	0.000100453	0.000209959	0.22425
IARS	-0.095719	-0.116129	-8.14423	3.49582e-15	2.68531e-14	23.6104
HMHA1	0.0957095	0.0269076	5.57222	4.25125e-08	1.39653e-07	7.66673
CPLX1	0.0956774	0.0423581	8.02864	8.03564e-15	5.90971e-14	22.7924
HNT	-0.0956773	-0.0543611	-10.3165	1.27183e-22	2.45997e-21	40.4966
PLA2R1	0.0956677	0.0494357	6.21447	1.13981e-09	4.59777e-09	11.1812
RHOBTB1	-0.0956668	-0.0705804	-10.7776	2.41552e-24	5.80386e-23	44.4137
ZFHX3	0.0956623	0.0179782	7.40378	6.20185e-13	3.70692e-12	18.5268
ANKRD46	-0.0956579	-0.0462229	-7.53177	2.60148e-13	1.61845e-12	19.3786
COL6A1	0.0956236	0.0824323	8.78595	2.95266e-17	2.89606e-16	28.3079
ZNF569	-0.0956155	-0.0981672	-10.4483	4.13772e-23	8.53217e-22	41.606
TMCO4	0.0956109	0.027376	6.88608	1.85391e-11	9.33566e-11	15.2004
EMP3	0.0955957	-0.0279576	4.90306	1.30347e-06	3.52217e-06	4.36428
THSD4	0.0955908	0.0262582	7.40899	5.98794e-13	3.58239e-12	18.5612
PPP2R1A	0.0955603	0.0487236	7.88568	2.22245e-14	1.55579e-13	21.7931
FGD2	0.0955318	0.00507198	4.92862	1.15139e-06	3.13709e-06	4.48349
DDAH2	0.0954889	0.053954	7.04059	6.85992e-12	3.61538e-11	16.1728
SGIP1	-0.0954779	-0.111845	-6.94818	1.24578e-11	6.38471e-11	15.5891
FRMPD4	-0.095461	-0.18881	-4.87983	1.45838e-06	3.9156e-06	4.25642
PAPLN	0.0954328	0.0570635	5.09153	5.1563e-07	1.47186e-06	5.25636
PRPS2	-0.0954304	-0.138528	-5.42581	9.27156e-08	2.92164e-07	6.91225
LOC284214	-0.0954186	-0.0838654	-4.46477	1.00569e-05	2.4128e-05	2.4079
PALM	0.0953796	0.0219901	8.82027	2.27096e-17	2.2491e-16	28.5664
LOC642031	0.0953775	0.0817434	7.85061	2.84642e-14	1.96908e-13	21.55
CEL	0.0953548	0.064314	10.9312	6.30604e-25	1.6372e-23	45.7415
TJAP1	-0.0953313	0.0377831	-6.62413	9.61566e-11	4.43881e-10	13.5921
SLC6A16	0.0952928	0.0678083	8.61892	1.04843e-16	9.61081e-16	27.0602
FUZ	0.095273	0.047259	10.3055	1.39582e-22	2.68905e-21	40.4047
FAM89B	0.0952596	0.0302124	13.0574	1.90847e-33	2.00618e-31	65.1581
PRPF8	-0.0952423	-0.0824621	-11.3155	2.08795e-26	6.96296e-25	49.1118
EXOC8	-0.0952417	-0.091858	-8.30276	1.10097e-15	8.97385e-15	24.7464
PSMC3	-0.0952056	-0.0673095	-10.1214	6.58982e-22	1.14623e-20	38.8717
MARVELD3	0.0951778	0.0443112	6.69979	6.00796e-11	2.85238e-10	14.0513
EGFLAM	0.0950936	0.0493848	7.53317	2.5767e-13	1.60459e-12	19.388
TNFAIP2	0.0950934	0.0433631	9.17048	1.49878e-18	1.72659e-17	31.2448
MAPKAPK2	0.0950931	0.0588471	6.09216	2.32712e-09	8.98607e-09	10.4866
ATP6V1C1	-0.0950496	-0.125821	-7.20215	2.38212e-12	1.3202e-11	17.2083
PROK2	0.0950312	-0.00801623	3.56435	0.000402214	0.000771329	-1.07742
RGMA	0.0949623	0.0735872	8.12276	4.08308e-15	3.1068e-14	23.4578
BMP6	0.0949356	-0.00281291	5.67977	2.37172e-08	8.05228e-08	8.23213
SFPQ	-0.0949334	-0.0482754	-8.39237	5.68957e-16	4.7743e-15	25.3958
RINT1	-0.0949281	-0.0540837	-7.90226	1.9765e-14	1.39422e-13	21.9082
ATP2B1	-0.0949097	-0.14128	-5.28926	1.88923e-07	5.7248e-07	6.22455
LOC283378	-0.094896	-0.0784399	-9.8317	7.31331e-21	1.11381e-19	36.4954
MAPRE2	-0.0948658	-0.0743034	-11.5609	2.28932e-27	8.71653e-26	51.2988
ZNF675	-0.0948477	-0.0788384	-8.62391	1.00973e-16	9.27802e-16	27.0972
LOC283624	0.0948446	0.00160617	9.04916	3.87462e-18	4.2557e-17	30.3086
LOC348692	0.0948242	0.0490546	12.2506	4.01818e-30	2.34802e-28	57.5792
PDE1B	0.094824	0.0428076	8.29312	1.18168e-15	9.5752e-15	24.6769
HNRNPA1	-0.0947678	-0.013857	-12.4941	4.09051e-31	2.81561e-29	59.8416
INSRR	0.0947663	0.0785649	9.34284	3.83169e-19	4.75385e-18	32.5895
C14orf112	-0.0947554	-0.063541	-10.7786	2.3932e-24	5.76455e-23	44.4229
SMN1	-0.094688	-0.0908659	-8.48528	2.85431e-16	2.48537e-15	26.0745
LOC730092	-0.0946809	-0.0593491	-8.26929	1.40696e-15	1.13012e-14	24.5053
FNIP1	-0.0946475	-0.00538128	-11.2174	5.01234e-26	1.55367e-24	48.2456
ZNF574	0.0946297	0.060625	11.6961	6.70459e-28	2.76504e-26	52.514
HBG1	0.0945267	-0.00182087	3.11946	0.00192362	0.00334694	-2.52624
METTL2B	-0.0944851	-0.0815906	-11.4566	5.8787e-27	2.10566e-25	50.3657
HAP1	0.0944528	0.0484852	7.22372	2.06547e-12	1.15131e-11	17.348
PRO2852	-0.0944453	-0.068487	-7.78831	4.4095e-14	2.97587e-13	21.1203
ZNF493	-0.0944136	-0.0404064	-10.3112	1.33026e-22	2.56786e-21	40.4522
TMEM5	-0.0944068	0.0403872	-9.15457	1.6984e-18	1.93923e-17	31.1215
SIDT1	-0.0943509	-0.112057	-5.00954	7.74641e-07	2.16113e-06	4.86457
FUT11	-0.0943194	-0.0525342	-12.0188	3.46342e-29	1.75365e-27	55.4467
FCGRT	0.0942931	0.0620998	9.19897	1.19767e-18	1.39718e-17	31.4658
ADAM10	-0.0942235	0.00172744	-10.4816	3.11226e-23	6.46587e-22	41.8874
KHDRBS1	-0.0942199	-0.0620511	-9.7937	9.9952e-21	1.49172e-19	36.187
NFIX	0.0941096	0.0608478	8.8848	1.38375e-17	1.40201e-16	29.0544
C10orf105	0.09407	-0.00813964	3.68164	0.000258737	0.000508948	-0.664963
ZNF486	-0.0940686	0.000136801	-8.17621	2.77271e-15	2.15035e-14	23.8382
TCEAL7	-0.0940345	-0.0795698	-6.5263	1.75528e-10	7.81734e-10	13.0047
SCARF1	0.0940087	0.0318065	8.29368	1.17683e-15	9.53993e-15	24.6809
NUTF2	0.0939766	0.0730564	9.17597	1.43542e-18	1.65953e-17	31.2873
PRRX2	0.0939615	0.0555978	5.83768	9.90323e-09	3.52175e-08	9.0793
RECQL	-0.0939459	-0.0446321	-8.56306	1.5956e-16	1.4288e-15	26.6468
TFE3	0.0939393	0.0801081	8.65774	7.82157e-17	7.28031e-16	27.3486
RP11-144G6.7	-0.0938938	-0.0870644	-8.22462	1.94979e-15	1.54561e-14	24.1844
HCN1	-0.0938593	-0.130425	-4.40246	1.32728e-05	3.13687e-05	2.14337
LPPR4	-0.0938267	-0.119937	-4.51143	8.15276e-06	1.9798e-05	2.60822
CXCR7	0.0937731	0.0587161	6.91448	1.5462e-11	7.85155e-11	15.3779
PTP4A3	0.0937602	0.010562	7.21536	2.18298e-12	1.21436e-11	17.2938
FOXJ1	0.0937386	0.0121573	4.03529	6.36877e-05	0.000136994	0.65452
SS18	-0.0937308	-0.0498088	-8.31327	1.01918e-15	8.34232e-15	24.8224
CCDC112	-0.0937108	-0.0664239	-11.6738	8.21158e-28	3.35081e-26	52.3133
CD180	0.0937013	0.00106886	4.84361	1.73583e-06	4.61886e-06	4.08921
PRKD2	0.0936428	0.0387442	8.21268	2.12686e-15	1.67431e-14	24.0989
EIF2AK4	0.0936377	0.0462399	12.6696	7.77608e-32	6.08226e-30	61.4858
MOSPD3	0.0936344	0.0851513	9.91077	3.80827e-21	6.00322e-20	37.1395
PERQ1	0.0936112	0.0635179	11.3813	1.15686e-26	4.00286e-25	49.6959
SP8	-0.0936094	0.0460588	-4.04942	6.00859e-05	0.000129853	0.709572
KLC2	0.0935966	0.058995	10.075	9.72069e-22	1.65218e-20	38.4878
NAPE-PLD	-0.0935753	-0.0927598	-9.1634	1.58461e-18	1.81896e-17	31.1899
ALS2CR8	-0.0935502	-0.0738456	-10.2904	1.58702e-22	3.03022e-21	40.2779
SCRT1	0.0935002	0.0430739	9.13713	1.94764e-18	2.20171e-17	30.9865
SERINC2	0.0934944	0.0334032	7.15384	3.2745e-12	1.78762e-11	16.8967
SRC	0.0934803	0.085902	11.4249	7.81834e-27	2.7545e-25	50.0836
MGRN1	0.0934466	0.0954747	9.16604	1.55208e-18	1.78268e-17	31.2103
SLC39A12	0.0934374	-0.0236395	3.83058	0.000145259	0.000295873	-0.123099
C11orf77	-0.0934303	-0.0686873	-6.70527	5.80553e-11	2.7617e-10	14.0848
AIFM3	0.0933851	0.0798854	7.38981	6.81401e-13	4.05528e-12	18.4345
ZW10	-0.0933079	-0.0870565	-14.1085	6.46449e-38	1.56295e-35	75.3582
TNXB	0.0932973	0.0177313	8.76092	3.5739e-17	3.46498e-16	28.1198
MMP9	0.0932054	0.14837	10.1371	5.77504e-22	1.0201e-20	39.002
KCTD8	-0.0931483	-0.132172	-5.93878	5.60416e-09	2.05139e-08	9.63221
BCAS2	-0.0931373	-0.115359	-6.81286	2.95188e-11	1.44949e-10	14.7457
H1F0	0.093125	-0.01247	4.67942	3.77167e-06	9.5888e-06	3.34524
TARBP1	-0.0931174	-0.0311958	-5.30226	1.7666e-07	5.37003e-07	6.28934
OTOS	0.0931044	-0.006436	5.70164	2.10402e-08	7.19646e-08	8.34824
ProSAPiP1	0.0930545	0.0649599	6.91646	1.5268e-11	7.75507e-11	15.3902
PPP1R2	-0.0930285	-0.10274	-7.64132	1.2258e-13	7.90548e-13	20.1168
SOX7	0.0930209	0.0686746	6.60924	1.05423e-10	4.84116e-10	13.5023
A2BP1	-0.092957	-0.149829	-4.77398	2.419e-06	6.31167e-06	3.77082
GPSM2	-0.0929424	-0.0350379	-8.21362	2.11243e-15	1.66363e-14	24.1056
SLC25A22	0.0929147	0.0955927	8.01013	9.17351e-15	6.70321e-14	22.6623
C9orf80	-0.0928907	-0.0603991	-13.3746	8.85405e-35	1.20602e-32	68.2004
DGKA	0.0928885	0.0685831	12.6937	6.18544e-32	4.9234e-30	61.7124
RFPL3S	-0.0928813	-0.0640669	-7.47539	3.81969e-13	2.32841e-12	19.002
KLRC2	-0.0927568	-0.0623045	-4.76428	2.53262e-06	6.59388e-06	3.72682
OGDH	0.0927458	0.0740711	11.8387	1.81959e-28	8.09067e-27	53.8047
PRR14	0.0927311	0.0550622	11.8981	1.05433e-28	4.92581e-27	54.3448
HP1BP3	-0.0927213	-0.09853	-7.18678	2.63638e-12	1.45361e-11	17.109
MYH11	0.0927052	-0.00980033	2.45887	0.0142985	0.0216351	-4.33434
KCTD3	-0.0926711	-0.0820931	-7.57585	1.92377e-13	1.21046e-12	19.6746
HSP90B1	-0.0926511	-0.0737284	-7.96024	1.30957e-14	9.41624e-14	22.3126
GSTM5	0.0926399	0.0628317	4.01257	6.99156e-05	0.000149641	0.566333
LOC441242	-0.0926369	-0.06206	-11.4852	4.54138e-27	1.65735e-25	50.621
LOC283999	-0.092609	-0.0751531	-7.35624	8.53937e-13	4.99905e-12	18.2133
LOC439949	-0.0925549	-0.0781477	-6.70117	5.95638e-11	2.82998e-10	14.0598
CCDC102A	0.0925338	0.0197389	5.81173	1.14465e-08	4.03715e-08	8.93874
UPK3B	0.092531	0.0760223	11.1268	1.12248e-25	3.28955e-24	47.4482
NINJ1	0.0924752	0.0168098	8.17755	2.74583e-15	2.13036e-14	23.8478
ZSWIM7	-0.0924682	-0.0746568	-6.20323	1.21769e-09	4.89861e-09	11.1169
C1QTNF5	0.092459	0.050064	8.91659	1.08312e-17	1.11257e-16	29.2957
SLC44A3	0.0924577	-0.0181275	4.58909	5.72559e-06	1.42436e-05	2.94587
CC2D1A	0.0924438	0.0359594	13.2244	3.80291e-34	4.45793e-32	66.7563
TMEM54	0.0924236	0.0622285	11.1717	7.53207e-26	2.27278e-24	47.8428
CRTC2	0.0924093	0.0448373	9.45254	1.59432e-19	2.06547e-18	33.4543
GPRC5C	0.092389	0.039473	6.46091	2.61423e-10	1.14064e-09	12.6161
BZW1	-0.0923802	-0.083747	-9.98369	2.08028e-21	3.3955e-20	37.7365
PRMT6	-0.092366	-0.0613544	-6.54413	1.57376e-10	7.05437e-10	13.1112
MLSTD2	-0.0923641	-0.086533	-10.3635	8.53176e-23	1.69253e-21	40.891
hCG_1644608	-0.0923618	-0.000149267	-12.9539	5.15915e-33	4.75182e-31	64.1729
SRFBP1	-0.0922963	-0.00385111	-9.60453	4.67903e-20	6.4552e-19	34.6638
MDK	0.0922963	-0.00361685	5.89633	7.12429e-09	2.57855e-08	9.39908
ATP5D	0.0922634	0.0282822	12.3139	2.22342e-30	1.32325e-28	58.1652
PLEKHH1	-0.0922425	-0.077478	-4.78314	2.31612e-06	6.05874e-06	3.8125
C18orf1	-0.0921981	-0.0628582	-10.652	7.18138e-24	1.62459e-22	43.3367
DUSP8	0.0921823	0.127321	6.13043	1.86366e-09	7.2822e-09	10.7027
PECAM1	0.0921782	-0.0177232	4.576	6.07901e-06	1.50705e-05	2.88861
DOK4	-0.0921558	-0.0780986	-8.27859	1.31435e-15	1.05882e-14	24.5722
UTS2	0.0921432	0.0461593	9.28606	6.01656e-19	7.22809e-18	32.1446
NME4	0.0921175	0.0745043	10.5222	2.19678e-23	4.64881e-22	42.2317
FAM45B	-0.0921131	-0.0843501	-11.5328	2.95386e-27	1.10724e-25	51.0466
TAGLN	0.0921062	0.0186992	6.20221	1.22502e-09	4.92605e-09	11.1111
HSPB3	-0.0920926	-0.173934	-3.80004	0.00016377	0.000331101	-0.235869
LGALS8	-0.0920795	-0.138817	-5.72904	1.80976e-08	6.2352e-08	8.49432
PAK4	0.092022	0.0433713	12.5665	2.06532e-31	1.49058e-29	60.5184
ARPC5	-0.0919936	-0.0369694	-14.0311	1.39534e-37	3.25164e-35	74.5955
P76	0.0919617	0.0226782	6.82321	2.76466e-11	1.36239e-10	14.8097
C16orf79	0.09196	0.0279452	10.972	4.40405e-25	1.16849e-23	46.0964
CA2	-0.0919291	-0.0670608	-4.50884	8.24871e-06	2.00259e-05	2.59705
LASS1	0.091883	0.0868822	6.93323	1.37123e-11	6.99058e-11	15.4953
TMEM86B	0.0918777	0.0603308	8.19239	2.46521e-15	1.92733e-14	23.9538
PCDHGA4	0.0918546	0.124346	12.4901	4.24747e-31	2.90299e-29	59.8043
INPP1	-0.0918052	-0.0496233	-10.7181	4.05113e-24	9.50934e-23	43.9026
CD177	0.0917977	0.0492164	7.51803	2.85728e-13	1.77133e-12	19.2866
PPCS	-0.0917607	-0.0550957	-8.88045	1.43088e-17	1.4475e-16	29.0214
MYL9	0.09176	0.0421839	5.58502	3.96791e-08	1.30723e-07	7.73352
MON2	-0.0917395	-0.0860077	-9.70216	2.11452e-20	3.04762e-19	35.4475
TMED10P	-0.0917329	-0.0413734	-7.54527	2.37215e-13	1.48102e-12	19.4691
TRIM8	0.0917316	0.0292753	9.31648	4.72572e-19	5.76791e-18	32.3827
SERAC1	-0.0917291	-0.102445	-8.0265	8.15963e-15	5.99861e-14	22.7774
RP11-50D16.3	-0.0917204	-0.0871659	-10.5428	1.84163e-23	3.93165e-22	42.4059
SFRP2	0.0917024	0.0198443	3.91725	0.000102906	0.000214854	0.201502
EMILIN3	0.0916656	0.037611	7.20767	2.29681e-12	1.27474e-11	17.244
COL1A1	0.0916529	0.0456712	5.0226	7.26279e-07	2.03325e-06	4.9266
ZNF14	-0.0916129	-0.0495517	-11.0872	1.59298e-25	4.54445e-24	47.102
EPB41L2	-0.0916057	-0.0485152	-8.42915	4.33275e-16	3.69019e-15	25.6638
HNRPA1L-2///HNRNPA1	-0.0915994	-0.0108989	-11.8474	1.67892e-28	7.49969e-27	53.8843
VSTM2L	0.0915894	0.0522284	7.51796	2.85855e-13	1.77155e-12	19.2862
CPNE1	0.0915777	0.0740579	12.7569	3.38817e-32	2.76515e-30	62.3086
DKFZP434B0335	0.0915694	0.0144439	8.00451	9.54939e-15	6.96998e-14	22.6228
TAF13	-0.0915666	-0.0317066	-8.1499	3.35537e-15	2.58153e-14	23.6507
GPR85	-0.0915487	-0.0792747	-5.8557	8.95251e-09	3.196e-08	9.17728
HIST1H1C	0.0914855	-0.0213816	4.02073	6.76155e-05	0.000144991	0.597947
PIP5K1C	0.0914556	0.0815627	9.64986	3.23791e-20	4.5647e-19	35.027
IL3RA	0.0914049	0.0138949	4.74055	2.83274e-06	7.3288e-06	3.61947
MARCKS	-0.0913524	-0.0563753	-10.1344	5.9093e-22	1.03813e-20	38.9793
SETD6	-0.091302	-0.0698276	-8.99341	5.97739e-18	6.39591e-17	29.8814
CA7	0.0912856	0.0541399	11.554	2.43837e-27	9.22953e-26	51.2364
TMEM118	-0.091264	-0.0958093	-6.29852	6.9336e-10	2.88036e-09	11.6653
KIAA0500	-0.0912633	-0.0914981	-4.154	3.884e-05	8.61815e-05	1.12275
ATP1B2	0.0912584	0.11664	7.10373	4.54735e-12	2.44455e-11	16.5752
TIA1	-0.0912277	-0.0609021	-9.88472	4.72345e-21	7.3857e-20	36.9269
C9orf165	0.0912143	0.0949477	6.31128	6.4268e-10	2.68135e-09	11.7393
HNRPDL	-0.091178	-0.0442853	-11.4688	5.26456e-27	1.89976e-25	50.4748
DOCK10	-0.0911681	-0.0644523	-7.93345	1.58431e-14	1.12951e-13	22.1255
LOC158376	0.0911494	0.0274576	5.2857	1.92422e-07	5.82446e-07	6.20683
HDAC7A	0.0911432	0.0363731	7.79282	4.27242e-14	2.88437e-13	21.1513
TGIF2	0.0911402	0.0580191	8.02153	8.45495e-15	6.20393e-14	22.7424
PCYOX1	-0.0911266	-0.0685135	-6.59157	1.1757e-10	5.37344e-10	13.3958
CIR	-0.0911207	-0.110233	-11.3395	1.68447e-26	5.66626e-25	49.3242
GDPD5	0.0910909	0.0383399	13.4775	3.2494e-35	4.87208e-33	69.1937
FASN	0.0910472	0.0743037	11.117	1.2237e-25	3.56459e-24	47.3628
DNM1	0.0909936	0.103028	6.65169	8.10567e-11	3.77419e-10	13.7589
PNOC	-0.0909782	-0.0769559	-4.72799	3.0051e-06	7.74273e-06	3.56287
LMTK3	0.0909776	0.087957	10.9168	7.15168e-25	1.84437e-23	45.617
CDK8	-0.0909312	-0.101406	-9.63136	3.76328e-20	5.24419e-19	34.8787
ADNP2	-0.090928	-0.0657458	-10.1991	3.43086e-22	6.24857e-21	39.5164
FAM59B	0.0909169	0.0364345	5.19419	3.07374e-07	9.05044e-07	5.75492
SLC25A40	-0.0909086	-0.098211	-6.85257	2.2948e-11	1.14044e-10	14.9918
PLA2G6	0.0909062	0.0599985	11.8244	2.07452e-28	9.14017e-27	53.6749
TMEM16D	-0.0908811	-0.0494719	-8.13088	3.85043e-15	2.946e-14	23.5155
FLNA	0.0908551	0.0595879	5.53524	5.18506e-08	1.68695e-07	7.47448
OSBPL1A	-0.090798	-0.047807	-10.7624	2.75637e-24	6.59006e-23	44.2832
TFF3	0.0907929	0.0413254	6.64629	8.38158e-11	3.89703e-10	13.7262
TOX3	-0.0907897	-0.0917644	-5.98775	4.24132e-09	1.57609e-08	9.90297
GNAL	-0.0907738	-0.0709556	-6.77123	3.83868e-11	1.86552e-10	14.489
GMFB	-0.0907374	-0.0825841	-7.90803	1.89733e-14	1.34131e-13	21.9484
LOC256374	-0.0907282	-0.0409409	-7.36841	7.86922e-13	4.63197e-12	18.2934
SLC16A9	0.0906859	0.0231204	3.69175	0.000248945	0.000490885	-0.628825
PRRG1	-0.0906679	-0.0669818	-6.15473	1.61757e-09	6.37079e-09	10.8405
IMPA2	0.0906337	0.0359383	5.9921	4.13714e-09	1.54004e-08	9.92714
PTPN23	0.0906166	0.0674492	12.7648	3.14366e-32	2.58743e-30	62.3828
LOC284454	0.0906164	0.030331	5.78764	1.30882e-08	4.58692e-08	8.80867
PRUNE2	-0.0905591	-0.0906808	-8.98325	6.46752e-18	6.86956e-17	29.8037
STXBP5	-0.0905414	-0.0954307	-6.72147	5.2462e-11	2.5061e-10	14.1838
MTIF2	-0.0905406	-0.0880171	-10.6704	6.12572e-24	1.4055e-22	43.4938
NRN1	-0.0905036	-0.0950823	-4.38705	1.42083e-05	3.34938e-05	2.07848
BCL9	0.0904968	0.0556211	15.0212	6.60587e-42	5.32378e-39	84.468
BHLHB4	0.0904935	0.0858796	5.89951	6.99784e-09	2.53563e-08	9.41648
C4orf16	-0.0904917	-0.109319	-7.32566	1.04813e-12	6.05344e-12	18.0125
CMTM7	0.0904738	0.0223831	7.45242	4.46394e-13	2.70494e-12	18.8491
TSPAN18	0.09042	0.0599676	6.51331	1.90035e-10	8.42653e-10	12.9272
TNS1	0.0904152	0.0150287	5.46208	7.65523e-08	2.43652e-07	7.0975
ANKRD35	0.0903819	0.0425776	9.33919	3.94478e-19	4.88789e-18	32.5608
DDEF2	-0.0903331	-0.0662948	-11.1477	9.31752e-26	2.77261e-24	47.6324
MOV10L1	0.0902983	0.125438	5.62347	3.22288e-08	1.07329e-07	7.93496
NDUFC2	-0.0902797	-0.0641336	-6.79632	3.277e-11	1.60222e-10	14.6436
AKTIP	-0.0902723	-0.0648352	-11.4201	8.16391e-27	2.85029e-25	50.0408
INTS7	-0.0902352	0.0262207	-8.4278	4.37619e-16	3.72227e-15	25.654
ACBD4	0.0902349	0.0696771	10.8408	1.39166e-24	3.49577e-23	44.9588
TFAP2A	0.0902139	0.236845	8.5975	1.23192e-16	1.12078e-15	26.9014
FXC1	-0.090211	-0.0450702	-8.39963	5.39194e-16	4.54625e-15	25.4486
FKBP4	-0.090199	-0.0526182	-6.72754	5.05058e-11	2.41922e-10	14.2209
MAP3K7	-0.090182	-0.0720739	-10.4522	4.002e-23	8.26112e-22	41.639
SUMO1	-0.0901763	-0.091743	-9.63526	3.6459e-20	5.10267e-19	34.9099
VDAC2	-0.0901524	-0.0960916	-6.32487	5.92665e-10	2.48393e-09	11.8182
CPSF1	0.0901274	0.0334674	8.87749	1.46381e-17	1.47761e-16	28.999
CLIC6	0.090126	0.0473981	6.86689	2.09498e-11	1.04787e-10	15.0809
HSPB2	0.0900831	0.0461478	6.64662	8.36444e-11	3.89e-10	13.7282
C10orf38	-0.0900741	-0.0506855	-10.1346	5.89797e-22	1.03758e-20	38.9812
HPRT1	-0.0900331	-0.0994867	-4.34277	1.72605e-05	4.02863e-05	1.89319
LY6G5C	0.0900308	0.0561255	10.232	2.5982e-22	4.79414e-21	39.7909
CD47	-0.0900257	-0.114124	-6.53658	1.64827e-10	7.36617e-10	13.0661
CLEC11A	0.0900251	0.0287585	10.1543	5.00041e-22	8.91409e-21	39.1443
FAM117A	0.0900244	0.0620616	10.561	1.57487e-23	3.36959e-22	42.5606
COL14A1	0.0900203	0.0934438	7.18903	2.59746e-12	1.43379e-11	17.1235
ARL1	-0.0900118	-0.0149897	-8.25604	1.55019e-15	1.23797e-14	24.4099
ZNF532	-0.0900096	-0.0420704	-12.8753	1.09446e-32	9.6223e-31	63.4279
KLC1	-0.0899828	-0.0702167	-9.47887	1.29045e-19	1.69105e-18	33.6629
OR52E4	0.0899797	0.102869	5.76598	1.47585e-08	5.14062e-08	8.69215
ITGA2	-0.0899684	0.169434	-6.92558	1.44014e-11	7.33415e-11	15.4473
EIF4EBP3	0.0899454	0.0343204	9.6697	2.7553e-20	3.90997e-19	35.1863
NR1D1	0.0899392	0.0354038	14.73	1.26735e-40	7.20973e-38	81.5389
COPS3	-0.0898724	-0.109346	-9.744	1.50216e-20	2.19447e-19	35.7849
SRPK1	-0.0898622	-0.10484	-8.67839	6.69005e-17	6.26932e-16	27.5025
DUSP2	-0.0898446	-0.0460296	-4.91515	1.22926e-06	3.33424e-06	4.4206
LRRC37A2	0.0898422	0.047341	4.75074	2.69989e-06	6.99831e-06	3.6655
HIPK1	0.0898095	0.068774	13.8669	7.09328e-37	1.46981e-34	72.9839
CD37	0.0897902	0.0171564	5.42711	9.2082e-08	2.90405e-07	6.91888
KIAA1450	-0.0897878	-0.10265	-10.6779	5.73904e-24	1.32622e-22	43.5583
COPS7B	0.0897843	0.0820889	12.8132	1.98095e-32	1.66589e-30	62.8402
TOP3B	0.0897391	0.0966688	4.09357	5.0035e-05	0.000109428	0.882792
ZNF213	0.0897328	0.0718581	11.2074	5.47948e-26	1.68496e-24	48.1575
GNG5	0.0897202	0.0352613	6.35701	4.89092e-10	2.06506e-09	12.0054
GSK3A	0.0896965	0.0660453	10.0583	1.11733e-21	1.88581e-20	38.3503
STAR	-0.0896872	-0.120231	-4.9075	1.27572e-06	3.45345e-06	4.38496
TACSTD1	-0.0896762	-0.104848	-3.55456	0.000417071	0.000797764	-1.11126
PCDHGA9	0.0896258	0.0951781	11.2511	3.71397e-26	1.18433e-24	48.5421
C1RL	0.0896251	-0.0138716	6.81844	2.84948e-11	1.40241e-10	14.7802
PLCH2	-0.0896195	0.0293153	-6.85839	2.21146e-11	1.10214e-10	15.028
MAPK6	-0.0896144	-0.0934861	-8.21494	2.09228e-15	1.65044e-14	24.1151
ARHGDIB	0.0895801	0.0059424	5.46251	7.63799e-08	2.43224e-07	7.09968
FBXO9	-0.0895584	-0.0408025	-9.71979	1.83111e-20	2.66096e-19	35.5895
DDEF1	-0.089534	-0.0598493	-10.3465	9.85242e-23	1.94059e-21	40.7489
UBE2T	-0.0895262	-0.130587	-4.77948	2.35674e-06	6.15833e-06	3.79583
SLC43A1	0.0895015	0.0242935	8.00103	9.79023e-15	7.13499e-14	22.5984
WDR41	-0.0894822	-0.0742263	-6.41326	3.48762e-10	1.49839e-09	12.3351
KCNJ6	-0.0894809	-0.132566	-5.1081	4.74599e-07	1.36319e-06	5.33623
LOC440396	-0.0894533	-0.0854259	-12.6462	9.70296e-32	7.44741e-30	61.2665
SLC16A4	0.0894474	0.0317284	8.17103	2.8789e-15	2.23003e-14	23.8013
VPS35	-0.0894361	-0.106837	-7.62085	1.41175e-13	9.03875e-13	19.9782
MXI1	0.0894296	0.0326519	7.19073	2.56861e-12	1.41868e-11	17.1345
ITGBL1	0.0894222	0.000752036	5.0797	5.46992e-07	1.55564e-06	5.1995
CLDND1	-0.0894119	-0.0341063	-4.82107	1.93356e-06	5.11193e-06	3.98568
GRRP1	0.0893923	0.0722621	5.89159	7.31741e-09	2.64202e-08	9.37311
CDS1	-0.089367	-0.066648	-5.97358	4.59823e-09	1.69958e-08	9.82445
TUBGCP5	-0.089365	-0.0785771	-8.52381	2.14077e-16	1.89418e-15	26.3575
DGCR6	0.0892589	0.0554619	5.9792	4.45327e-09	1.64852e-08	9.85558
RIN3	0.0892581	0.0312148	5.98389	4.33569e-09	1.60807e-08	9.88158
BRI3	0.089249	0.0642717	10.288	1.6195e-22	3.08615e-21	40.2579
[truncated: 11,693 more rows]
